# Supplementary material for: The asymmetric vinylogous Mannich reaction of noncyclic dicyanoolefins catalyzed by a bifunctional thiourea–ammonium salt phase transfer catalyst
Source: Royal Society of Chemistry journal article supplement (doi:10.1039/c9nj01635j), 2019-01-01
Supplement: c9nj01635j1.pdf [file c9nj01635j1.pdf]

## Supporting Information

### The asymmetric vinylogous Mannich reaction of noncyclic dicyanoolefins catalyzed by a bifunctional thiourea-ammonium salt phase transfer catalyst

Yanhong Fang, Zhonglin Wei, Ying Wang<sup>b</sup>, Shuo Liu, Jungang Cao, Dapeng Liang, Yingjie Lin, and Haifeng Duan

<sup>a</sup>*Department of Organic Chemistry, College of Chemistry, Jilin University, 2699 Qianjin Street, Changchun 130012, China.*

<sup>b</sup>*Department of Ophthalmology, the second Hospital of Jilin University, Changchun, 130041, China*

E-mail: linyj@jlu.edu.cn; duanhf@jlu.edu.cn; Tel: 0431-85168398;

#### Table of Contents

|                                                                                                                                                                                       |    |
|---------------------------------------------------------------------------------------------------------------------------------------------------------------------------------------|----|
| <b>1. General Information</b> .....                                                                                                                                                   | 1  |
| <b>2. Starting materials</b> .....                                                                                                                                                    | 1  |
| <b>3. General procedure for preparation of catalyst 1g-1i.</b> .....                                                                                                                  | 2  |
| <b>3.1 Preparation of catalyst 1g-1i.</b> .....                                                                                                                                       | 2  |
| <b>3.2 Characterization of catalysts 1g.</b> .....                                                                                                                                    | 3  |
| <b>4. General procedure for vinylogous Mannich reaction of dicyanoalkylidenes with <math>\alpha</math>-amido sulfones and characterization of products 4a-4t, derivative 5a</b> ..... | 5  |
| <b>5. NMR spectra of addition products 4a-4t and derivative 5a</b> .....                                                                                                              | 16 |
| <b>6. HPLC traces of all compounds 4a-4t and derivative 5a</b> .....                                                                                                                  | 37 |
| <b>7. Reference</b> .....                                                                                                                                                             | 58 |

## 1. General Information

Unless otherwise stated, all reagents were purchased from commercial suppliers and used without purification. All solvents were obtained from commercial sources and were purified according to standard procedures. For thin-layer chromatography (TLC), silica gel plates (HSGF 254) were used and compounds were visualized by irradiation with UV light. Purification of reaction products was carried out by flash column chromatography using silica gel (200-300 mesh).  $^1\text{H}$  and  $^{13}\text{C}$  NMR spectra were recorded on a Varian Mercury-300BB (300 MHz), a Bruker NMR Spectrometer (400 MHz) or a Bruker NMR Spectrometer (500 MHz). All chemical shifts ( $\delta$ ) were given in ppm. Chemical shifts ( $\delta$  ppm) are relative to the resonance of the deuterated solvent as the internal standard ( $\text{CDCl}_3$ ,  $\delta$  7.26 ppm for proton NMR,  $\delta$  77.16 ppm for carbon NMR;  $\text{CD}_3\text{OD-d}_4$ ,  $\delta$  3.31 ppm for proton NMR,  $\delta$  49.00 ppm for carbon NMR). Data are presented as follows: chemical shift, integration, multiplicity (br = broad, s = singlet, d = doublet, t = triplet, q = quartet, m = multiplet) and coupling constant in Hertz (Hz). Mass spectra were recorded on the Bruker Agilent 1290 MicroTOF Q II. Melting points were measured on a melting point apparatus and were uncorrected. The ee values determination was carried out using chiral HPLC (Waters) with Chiracel AD-H column, Chiracel OD-H column and Chiracel AS-H column. Optical rotations were measured on a Shanghai ShenGuang SGW-2 Polarimeter at  $\lambda = 589$  nm. Optical rotations are reported as follows:  $[\alpha]_{\text{D}}^{25}$  (c=g/100 mL, solvent).

## 2. Starting materials

Urea **1o** and compound **1i'** were prepared according to reported procedure.<sup>1, 2</sup> All  $\alpha,\alpha$ -dicyanoolefins were prepared according to literature procedure.<sup>3</sup> Differently substituted dicyanoolefins were also in accordance with similar synthetic method. All amidosulfones were prepared using reported procedures from corresponding aldehydes.<sup>4-6</sup> All phase-transfer catalysts **1a**<sup>7</sup>, **1b-1e**<sup>8, 9</sup> were synthesized according to procedures reported previously. *m*-xylene was dried over 4Å M.S.

### 3. General procedure for preparation of catalyst **1g-1i**.

#### 3.1 Preparation of catalyst **1g-1i**.

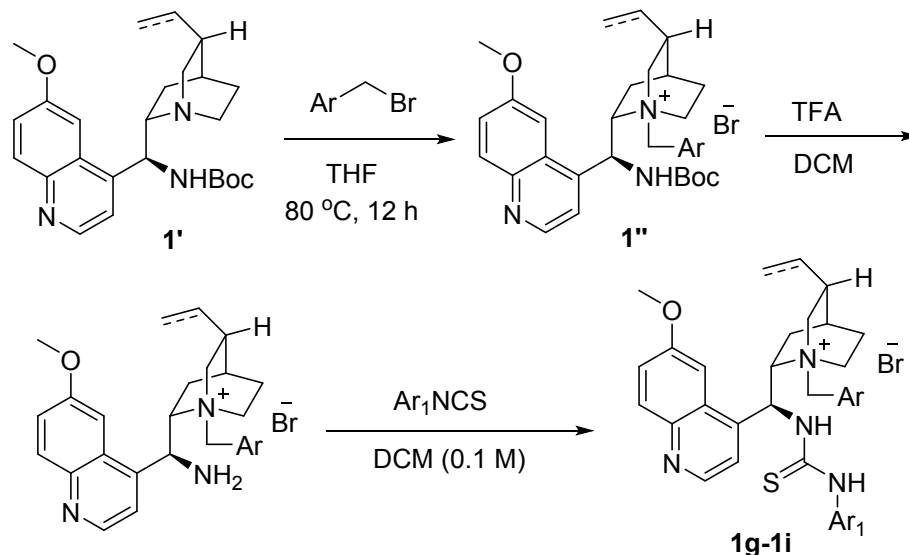

Under argon protection, **1i''** (500 mg, 1.18 mmol, 1 eq.) was dissolved in 8 mL anhydrous THF, benzyl bromide ( 1.3 mmol, 1.1 eq.) was added, the mixture was heated to reflux, after 12 h, the mixture was concentrated under reduced pressure and purified by flash chromatography (Et<sub>2</sub>O/MeOH = 10:1 to 8:1) to afford the desired product **1i''**.

Under argon protection, TFA (2.4 mL) was added to a solution of **1i''** (0.24 mmol) in 2.4 mL anhydrous CH<sub>2</sub>Cl<sub>2</sub> while stirring, the mixture was stirred overnight and concentrated to dryness under reduced pressure. The residue was redissolved in 10 mL CH<sub>2</sub>Cl<sub>2</sub>, the mixture was adjusted to pH 7-8 by aqueous ammonia and extracted by CH<sub>2</sub>Cl<sub>2</sub> (2×5 mL). The organic phases were combined, dried over anhydrous Na<sub>2</sub>SO<sub>4</sub>, evaporated under reduced pressure. The crude free amine was dried under vacuum and dissolved in 2.4 mL anhydrous CH<sub>2</sub>Cl<sub>2</sub>, Aryl isothiocyanate (0.26 mmol, 1.1 eq.) was added and the resulting mixture was stirred at rt overnight. After evaporation of the volatiles, the crude reaction mixture was purified by flash column chromatography (DCM/MeOH = 50:1 to 30:1) to give catalyst **1g-1i**.

### 3.2 Characterization of catalysts 1g.

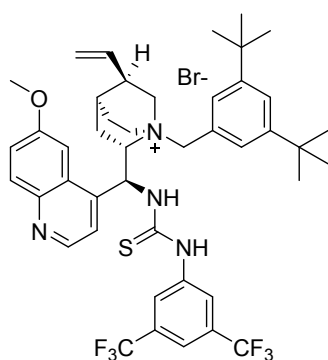

Light yellow solid, 130 mg, 62 % yield for two steps.

**m.p.** = 144-145°C,  $[\alpha]_D^{25} = -48.5$  (c = 0.5, CHCl<sub>3</sub>).

**<sup>1</sup>H NMR** (300 MHz, cd<sub>3</sub>od) δ 8.79 (d, J = 4.7 Hz, 1H), 8.14 (d, J = 2.5 Hz, 1H), 8.00 (d, J = 9.2 Hz, 1H), 7.94 (s, 2H), 7.71 (d, J = 4.8 Hz, 1H), 7.62 (d, J = 5.9 Hz, 2H), 7.49 (dd, J = 9.3, 2.5 Hz, 1H), 7.41 (d, J = 1.5 Hz, 2H),

7.27 (d, J = 10.6 Hz, 1H), 5.97 – 5.80 (m, 1H), 5.36 – 5.14 (m, 3H), 5.09 – 4.86 (m, 2H), 4.55 (d, J = 12.9 Hz, 1H), 4.05 (s, 3H), 3.90 – 3.80 (m, 1H), 3.57 – 3.46 (m, 1H), 3.40 – 3.29 (m, 1H), 2.73 (q, J = 16.2, 7.8 Hz, 1H), 2.26 – 2.02 (m, 3H), 1.89 (s, 1H), 1.33 (s, 18H), 1.26 – 1.11 (m, 2H).

**<sup>13</sup>C NMR** (101 MHz, MeOD) δ 180.61, 159.19, 152.12, 147.26, 144.46, 143.62, 140.93, 136.14, 131.56, 131.27, 130.50, 127.67, 127.23, 126.41, 124.48, 123.33, 123.17, 119.51, 117.60, 116.80, 102.38, 69.20, 66.32, 60.20, 55.50, 54.13, 49.81, 49.49, 36.97, 34.46, 30.30, 27.48, 26.56, 24.02.

**HRMS** (ESI): calculated for C<sub>44</sub>H<sub>51</sub>F<sub>6</sub>N<sub>4</sub>OS [M-Br]<sup>+</sup>: 797.3682, found 797.3690.

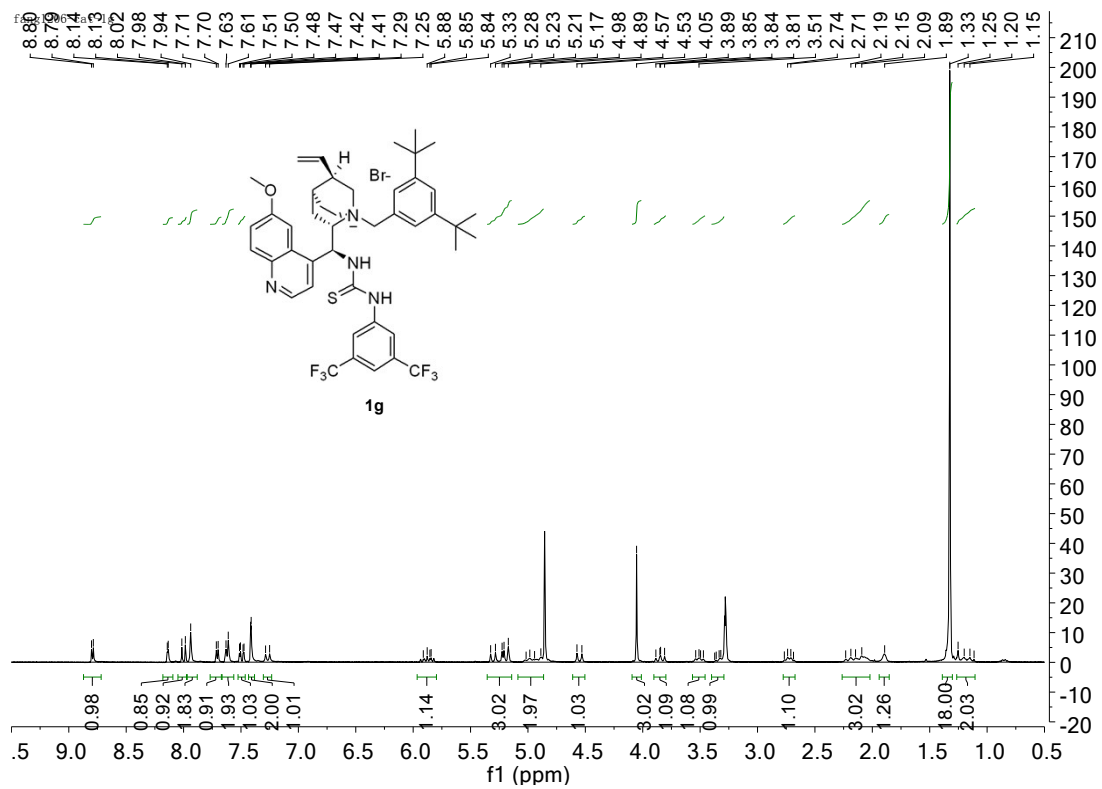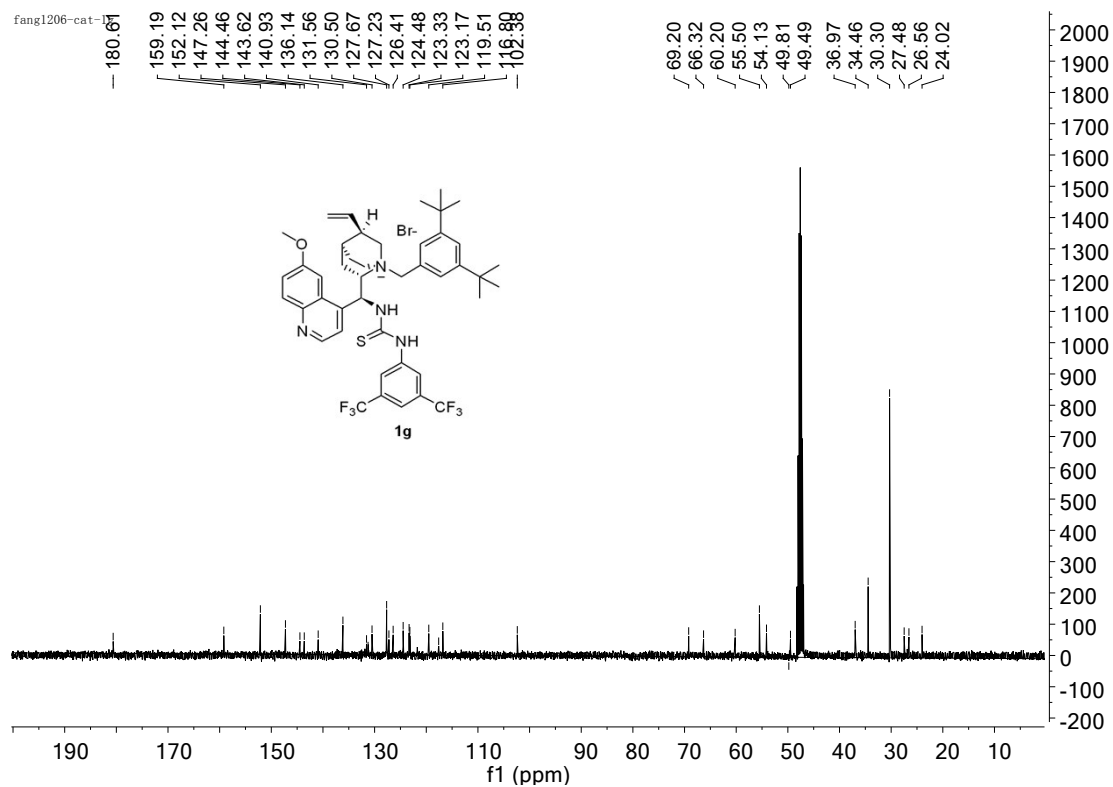

#### 4. General procedure for vinylogous Mannich reaction of dicyanoalkylidenes with $\alpha$ -amido sulfones and characterization of products 4a-4t, derivative 5a

Dicyanoalkylidenes **2** (0.1 mmol),  $\alpha$ -amido sulfones **3** (0.11 mmol) and catalyst **1g** (8.8 mg, 0.01 mmol, 10 mol%) were dissolved in dry *m*-xylene (1 mL), the mixture was cooled to  $-30^{\circ}\text{C}$ , freshly grounded  $\text{K}_3\text{PO}_4$  (106 mg, 0.5 mmol, 5 eq.) was added in one portion, the resulting suspension was vigorously stirred for 48h, 1 mL sat. aq.  $\text{NH}_4\text{Cl}$  was added and the solution was allowed to warm to room temperature, the aqueous was extracted with EA (3 $\times$ 5 mL), then the organic layer was dried over  $\text{Na}_2\text{SO}_4$ , filtered and concentrated under reduced pressure. The crude product was purified by flash chromatography (PE/EA = 5:1).

##### tert-butyl (R)-(4,4-dicyano-1,3-diphenylbut-3-en-1-yl)carbamate (**4a**)

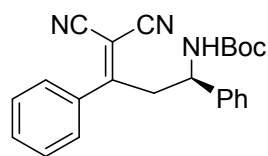

Colorless solid, 37.0 mg, 99% yield, **m.p.** =  $41\text{--}42^{\circ}\text{C}$ ,  $[\alpha]_{\text{D}}^{25} = +41.6$  ( $c = 0.5$ ,  $\text{CHCl}_3$ ). The ee value was 91% (Chiralpak AD-H, hexane/*i*-PrOH = 80:20, 230 nm, 1 mL/min,  $t_{\text{major}} = 6.414$  min.,  $t_{\text{minor}} = 5.264$  min).

**$^1\text{H NMR}$**  (300 MHz,  $\text{CDCl}_3$ )  $\delta$  7.66 – 7.31 (m, 5H), 7.30 – 7.17 (m, 3H), 7.16 – 6.92 (m, 2H), 4.77 (d,  $J = 4.9$  Hz, 1H), 4.53 (q,  $J = 7.5, 5.1$  Hz, 1H), 3.76 – 3.53 (m, 1H), 3.30 (dd,  $J = 13.5, 6.5$  Hz, 1H), 1.36 (s, 9H).

**$^{13}\text{C NMR}$**  (101 MHz,  $\text{CDCl}_3$ )  $\delta$  176.13, 154.80, 139.05, 134.13, 132.29, 129.21, 129.17, 128.65, 128.00, 126.46, 112.51, 86.31, 80.26, 54.10, 44.29, 28.32.

**HRMS** (ESI): calculated for  $(\text{C}_{23}\text{H}_{23}\text{N}_3\text{NaO}_2)^+$ : 396.1682, found 396.1681.

##### tert-butyl (R)-(4,4-dicyano-1-(2-methoxyphenyl)-3-phenylbut-3-en-1-yl)carbamate (**4b**)

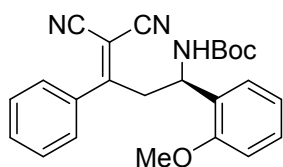

Colorless solid, 39.9 mg, 99% yield, **m.p.** =  $40\text{--}41^{\circ}\text{C}$ ,  $[\alpha]_{\text{D}}^{25} = +55.3$  ( $c = 0.38$ ,  $\text{CHCl}_3$ ). The ee value was 88% (Chiralpak AS,

hexane/*i*-PrOH = 80:20, 230 nm, 1 mL/min, *t*<sub>major</sub> = 8.249 min., *t*<sub>minor</sub> = 10.802 min).

<sup>1</sup>H NMR (300 MHz, CDCl<sub>3</sub>) δ 7.73 – 7.37 (m, 5H), 7.35 – 7.26 (m, 1H), 7.06 – 6.80 (m, 2H), 6.799 – 6.713 (m, 1H), 5.70 (d, *J* = 9.7 Hz, 1H), 4.72 (q, *J* = 16.6, 8.0 Hz, 1H), 3.91 (s, 3H), 3.75 – 3.58 (m, 1H), 3.51 (dd, *J* = 13.1, 7.3 Hz, 1H), 1.44 (s, 9H).

<sup>13</sup>C NMR (101 MHz, CDCl<sub>3</sub>) δ 176.37, 157.08, 154.97, 144.31, 134.28, 132.22, 129.76, 129.08, 128.17, 126.46, 120.69, 112.88, 111.10, 85.90, 79.85, 55.33, 53.05, 42.81, 28.40.

HRMS (ESI): calculated for (C<sub>24</sub>H<sub>25</sub>N<sub>3</sub>NaO<sub>3</sub>)<sup>+</sup>: 426.1788, found 426.1789.

tert-butyl (R)-(4,4-dicyano-1-(2-fluorophenyl)-3-phenylbut-3-en-1-yl)carbamate (**4c**)

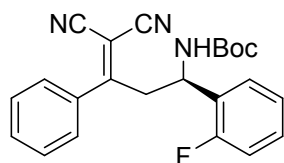

Colorless oil, 37.6 mg, 96% yield, [*a*]<sub>D</sub><sup>25</sup> = +13.9 (*c* = 0.49, CHCl<sub>3</sub>). The ee value was 95% (Chiralpak AD-H, hexane/*i*-PrOH = 80:20, 230 nm, 1 mL/min, *t*<sub>major</sub> = 7.360 min., *t*<sub>minor</sub> = 6.236 min).

<sup>1</sup>H NMR (300 MHz, CDCl<sub>3</sub>) δ 7.65 – 7.41 (m, 5H), 7.36 – 7.27 (m, 1H), 7.17 – 6.98 (m, 3H), 5.14 (d, *J* = 9.0 Hz, 1H), 4.86 (q, *J* = 15.2, 8.1 Hz, 1H), 3.71 – 3.54 (m, 1H), 3.42 (dd, *J* = 13.6, 6.5 Hz, 1H), 1.43 (s, 9H).

<sup>13</sup>C NMR (101 MHz, CDCl<sub>3</sub>) δ 175.51, 161.78, 154.69, 134.04, 132.39, 130.27 (d, *J* = 8.5 Hz), 129.24, 128.55, 128.01, 124.70 (d, *J* = 3.4 Hz), 116.32 (d, *J* = 21.2 Hz), 112.53, 104.21, 80.40, 77.24, 50.35, 43.51, 28.29.

HRMS (ESI): calculated for (C<sub>23</sub>H<sub>22</sub>FN<sub>3</sub>NaO<sub>2</sub>)<sup>+</sup>: 414.1588, found 414.1583.

tert-butyl (R)-(4,4-dicyano-1-(3-methoxyphenyl)-3-phenylbut-3-en-1-yl)carbamate (**4d**)

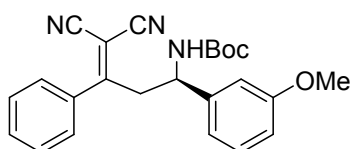

Colorless solid, 39.1 mg, 97% yield, *m.p.* = 42-43 °C, [*a*]<sub>D</sub><sup>25</sup> = +46.8 (*c* = 0.53, CHCl<sub>3</sub>). The ee value was

87% (Chiralpak AD-H, hexane/*i*-PrOH = 80:20, 230 nm, 1 mL/min,  $t_{\text{major}} = 7.689$  min.,  $t_{\text{minor}} = 6.252$  min).

$^1\text{H NMR}$  (400 MHz,  $\text{CDCl}_3$ )  $\delta$  7.70 – 7.38 (m, 5H), 7.357 – 7.212 (m, 1H), 6.946 – 6.883 (m, 1H), 6.72 (d,  $J = 7.0$  Hz, 1H), 6.67 (s, 1H), 4.90 (d,  $J = 6.3$  Hz, 1H), 4.59 (d,  $J = 5.7$  Hz, 1H), 3.81 (s, 3H), 3.78 – 3.59 (m, 1H), 3.41 (dd,  $J = 13.3, 7.0$  Hz, 1H), 1.47 (s, 9H).

$^{13}\text{C NMR}$  (101 MHz,  $\text{CDCl}_3$ )  $\delta$  176.05, 160.04, 154.83, 140.51, 134.10, 132.31, 130.28, 129.21, 128.04, 118.56, 114.21, 112.55, 112.06, 86.32, 80.27, 55.31, 54.10, 44.18, 28.32.

**HRMS** (ESI): calculated for  $(\text{C}_{24}\text{H}_{25}\text{N}_3\text{NaO}_3)^+$ : 426.1788, found 426.1786.

tert-butyl (R)-(1-(3-chlorophenyl)-4,4-dicyano-3-phenylbut-3-en-1-yl)carbamate (**4e**)

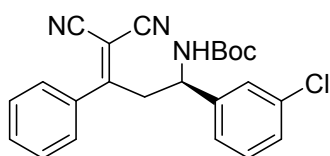

Colorless solid, 39.2 mg, 96% yield, **m.p.** = 40-41 °C,  $[\alpha]_{\text{D}}^{25} = +28.8$  ( $c = 0.5$ ,  $\text{CHCl}_3$ ). The ee value was 93% (Chiralpak AD-H, hexane/*i*-PrOH = 80:20, 230 nm, 1 mL/min,  $t_{\text{major}} = 6.443$  min.,  $t_{\text{minor}} = 5.542$  min).

$^1\text{H NMR}$  (300 MHz,  $\text{cdCl}_3$ )  $\delta$  7.65 – 7.50 (m, 2H), 7.480 – 7.428 (m, 2H), 7.338 – 7.272 (m, 3H), 7.115 – 6.982 (m, 2H), 4.82 (d,  $J = 6.2$  Hz, 1H), 4.61 (q,  $J = 11.8, 4.3$  Hz, 1H), 3.92 – 3.44 (m, 1H), 3.35 (dd,  $J = 13.5, 6.6$  Hz, 1H), 1.44 (s, 9H).

$^{13}\text{C NMR}$  (101 MHz,  $\text{CDCl}_3$ )  $\delta$  178.48, 154.68, 141.35, 134.95, 134.00, 132.44, 130.48, 129.32, 128.74, 127.94, 126.78, 124.46, 112.37, 86.87, 80.54, 53.52, 44.19, 28.28.

**HRMS** (ESI): calculated for  $(\text{C}_{23}\text{H}_{22}\text{ClN}_3\text{NaO}_2)^+$ : 430.1293, found 430.1293.

tert-butyl (R)-(4,4-dicyano-3-phenyl-1-(*p*-tolyl)but-3-en-1-yl)carbamate (**4f**)

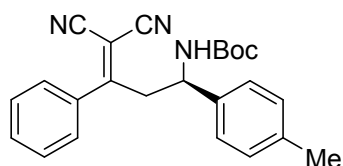

Colorless solid, 36.4 mg, 94% yield, **m.p.** = 41-42 °C,  $[\alpha]_{\text{D}}^{25} = +59.2$  ( $c = 0.5$ ,  $\text{CHCl}_3$ ). The ee value was 93%



(Chiralpak AD-H, hexane/*i*-PrOH = 80:20, 230 nm, 1 mL/min,  $t_{\text{major}} = 6.542$  min.,  $t_{\text{minor}} = 5.675$  min).

$^1\text{H NMR}$  (400 MHz,  $\text{CDCl}_3$ )  $\delta$  7.62 – 7.52 (m, 3H), 7.503 – 7.452 (m, 2H), 7.17 (d,  $J = 7.9$  Hz, 2H), 7.02 (d,  $J = 7.9$  Hz, 2H), 4.84 (d,  $J = 6.5$  Hz, 1H), 4.57 (q,  $J = 14.4, 7.1$  Hz, 1H), 3.80 – 3.67 (m, 1H), 3.40 (dd,  $J = 13.6, 7.3$  Hz, 1H), 2.38 (s, 3H), 1.46 (s, 9H).

$^{13}\text{C NMR}$  (101 MHz,  $\text{CDCl}_3$ )  $\delta$  175.89, 154.79, 138.52, 136.01, 134.70, 134.11, 132.24, 129.80, 129.18, 128.01, 126.38, 86.21, 80.15, 53.83, 44.24, 28.32, 21.14.

**HRMS** (ESI): calculated for  $(\text{C}_{24}\text{H}_{25}\text{N}_3\text{NaO}_2)^+$ : 410.1839, found 410.1838.

tert-butyl (R)-(4,4-dicyano-1-(4-methoxyphenyl)-3-phenylbut-3-en-1-yl)carbamate(**4g**)

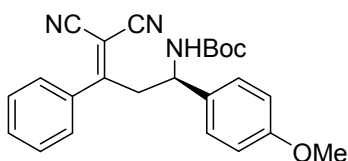

Colorless solid, 39.1 mg, 97% yield, **m.p.** = 43–44 °C,  
 $[\alpha]_{\text{D}}^{25} = +30.6$  ( $c = 0.51$ ,  $\text{CHCl}_3$ ). The ee value was 88%  
(Chiralpak AD-H, hexane/*i*-PrOH = 80:20, 230 nm, 1 mL/min,  $t_{\text{major}} = 7.155$  min.,  $t_{\text{minor}} = 6.577$  min).

$^1\text{H NMR}$  (400 MHz,  $\text{CDCl}_3$ )  $\delta$  7.63 – 7.45 (m, 4H), 7.32 – 7.24 (m, 1H), 6.93 – 6.84 (m, 1H), 6.72 (d,  $J = 7.6$  Hz, 1H), 6.68 – 6.63 (m, 1H), 4.90 (d,  $J = 7.4$  Hz, 1H), 4.59 (q, 1H), 3.81 (s, 3H), 3.78 – 3.60 (m, 1H), 3.41 (dd,  $J = 13.6, 7.2$  Hz, 1H), 1.46 (s, 9H).

$^{13}\text{C NMR}$  (101 MHz,  $\text{CDCl}_3$ )  $\delta$  176.16, 160.04, 140.52, 134.10, 132.31, 130.28, 129.21, 128.04, 118.56, 114.21, 112.05, 86.34, 80.24, 55.31, 54.13, 44.18, 28.32.

**HRMS** (ESI): calculated for  $(\text{C}_{24}\text{H}_{25}\text{N}_3\text{NaO}_3)^+$ : 426.1788, found 426.1788.

tert-butyl (R)-(4,4-dicyano-1-(4-fluorophenyl)-3-phenylbut-3-en-1-yl)carbamate(**4h**)

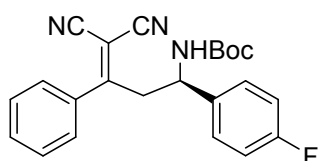

Colorless solid, 36 mg, 92% yield, **m.p.** = 42–43 °C,  
 $[\alpha]_{\text{D}}^{25} = +31.8$  ( $c = 0.44$ ,  $\text{CHCl}_3$ ). The ee value was 93%  
(Chiralpak AD-H, hexane/*i*-PrOH = 80:20, 230 nm, 1

mL/min,  $t_{\text{major}} = 10.542$  min.,  $t_{\text{minor}} = 7.176$  min).

$^1\text{H NMR}$  (300 MHz,  $\text{CDCl}_3$ )  $\delta$  7.63 – 7.49 (m, 3H), 7.486 – 7.384 (m, 2H), 7.19 – 7.08 (m, 2H), 7.07 – 6.95 (m, 2H), 4.79 (d,  $J = 7.5$  Hz, 1H), 4.59 (q,  $J = 13.8, 6.8$  Hz, 1H), 3.76 – 3.62 (m, 1H), 3.36 (dd,  $J = 13.6, 7.2$  Hz, 1H), 1.43 (s, 9H).

$^{13}\text{C NMR}$  (101 MHz,  $\text{CDCl}_3$ )  $\delta$  175.76, 163.79, 161.32, 155.49 (d,  $J = 17.7$  Hz), 134.00, 132.40, 129.30, 128.26 (d,  $J = 8.5$  Hz), 127.94, 116.10 (d,  $J = 21.6$  Hz), 112.40, 86.56, 80.43, 53.41, 44.15, 28.29.

**HRMS** (ESI): calculated for  $(\text{C}_{23}\text{H}_{22}\text{FN}_3\text{NaO}_2)^+$ : 414.1588, found 414.1588.

tert-butyl (R)-(1-(4-chlorophenyl)-4,4-dicyano-3-phenylbut-3-en-1-yl)carbamate (**4i**)

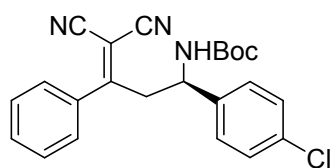

Colorless solid, 40.4 mg, 99% yield, **m.p.** = 45-46 °C,  $[\alpha]_{\text{D}}^{25} = +37.1$  ( $c = 0.48$ ,  $\text{CHCl}_3$ ). The ee value was 97% (Chiralpak AD-H, hexane/*i*-PrOH = 80:20, 230 nm, 1 mL/min,  $t_{\text{major}} = 8.245$  min.,  $t_{\text{minor}} = 5.700$  min).

$^1\text{H NMR}$  (300 MHz,  $\text{CDCl}_3$ )  $\delta$  7.65 – 7.50 (m, 3H), 7.50 – 7.40 (m, 2H), 7.38 – 7.28 (m, 2H), 7.13 – 7.01 (m, 2H), 4.80 (d,  $J = 7.1$  Hz, 1H), 4.60 (q, 1H), 3.77 – 3.59 (m, 1H), 3.36 (dd,  $J = 13.7, 7.0$  Hz, 1H), 1.44 (s, 9H).

$^{13}\text{C NMR}$  (101 MHz,  $\text{CDCl}_3$ )  $\delta$  175.59, 154.68, 137.68, 134.50, 133.96, 132.44, 129.35, 129.33, 127.93, 127.85, 112.36, 86.51, 80.51, 53.42, 44.03, 28.29.

**HRMS** (ESI): calculated for  $(\text{C}_{23}\text{H}_{22}\text{ClN}_3\text{NaO}_2)^+$ : 430.1293, found 430.1293.

tert-butyl (R)-(1-(4-bromophenyl)-4,4-dicyano-3-phenylbut-3-en-1-yl)carbamate (**4j**)

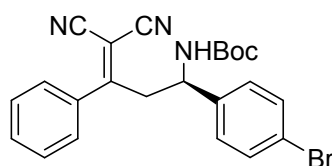

Colorless solid, 39.8 mg, 88% yield, **m.p.** = 42-43°C,  $[\alpha]_{\text{D}}^{25} = +36.3$  ( $c = 0.49$ ,  $\text{CHCl}_3$ ). The ee value was 95% (Chiralpak AD-H, hexane/*i*-PrOH = 80:20, 230 nm, 1

mL/min,  $t_{\text{major}} = 9.731$  min.,  $t_{\text{minor}} = 6.549$  min).

$^1\text{H NMR}$  (300 MHz,  $\text{CDCl}_3$ )  $\delta$  7.72 – 7.50 (m, 3H), 7.50 – 7.35 (m, 4H), 6.99 (d,  $J = 8.3$  Hz, 2H), 4.80 (d,  $J = 21.4$  Hz, 1H), 4.55 (q, 1H), 3.75 – 3.53 (m, 1H), 3.34 (dd,  $J = 13.6$ , 7.0 Hz, 1H), 1.42 (s, 9H).

$^{13}\text{C NMR}$  (101 MHz,  $\text{CDCl}_3$ )  $\delta$  175.61, 154.68, 138.24, 133.97, 132.44, 132.29, 129.33, 128.16, 127.93, 122.57, 112.36, 86.56, 80.50, 53.49, 43.99, 28.29.

**HRMS** (ESI): calculated for  $(\text{C}_{23}\text{H}_{22}\text{BrN}_3\text{NaO}_2)^+$ : 474.0788, found 474.0787.

tert-butyl(R)-(4,4-dicyano-3-phenyl-1-(4-(trifluoromethyl)phenyl)but-3-en-1-yl)carbamate (**4k**)

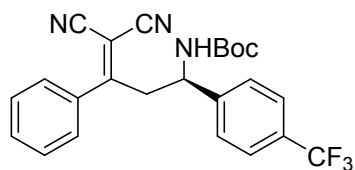

Colorless solid, 43.3 mg, 98% yield, **m.p.** = 58-59°C,  $[\alpha]_{\text{D}}^{25} = +22.9$  ( $c = 0.48$ ,  $\text{CHCl}_3$ ). The ee value was 97% (Chiralpak AD-H, hexane/*i*-PrOH = 80:20, 230 nm, 1 mL/min,  $t_{\text{major}} = 9.000$  min.,  $t_{\text{minor}} = 6.567$  min).

$^1\text{H NMR}$  (300 MHz,  $\text{CDCl}_3$ )  $\delta$  7.70 – 7.50 (m, 5H), 7.50 – 7.43 (m, 2H), 7.31 – 7.26 (m, 2H), 4.84 (d,  $J = 6.8$  Hz, 1H), 4.72 (q,  $J = 13.4$ , 6.4 Hz, 1H), 3.72 – 3.58 (m, 1H), 3.38 (dd,  $J = 13.7$ , 6.4 Hz, 1H), 1.43 (s, 9H).

$^{13}\text{C NMR}$  (101 MHz,  $\text{CDCl}_3$ )  $\delta$  182.46, 154.66, 143.41, 136.83, 133.95, 132.50, 129.39, 127.87, 126.84, 126.15 (q,  $J = 7.2$ , 3.9 Hz), 112.30, 86.86, 80.84, 53.56, 44.05, 28.26.

**HRMS** (ESI): calculated for  $(\text{C}_{24}\text{H}_{22}\text{F}_3\text{N}_3\text{NaO}_2)^+$ : 464.1556, found 464.1557.

tert-butyl (R)-(4,4-dicyano-1-(4-nitrophenyl)-3-phenylbut-3-en-1-yl)carbamate (**4l**)

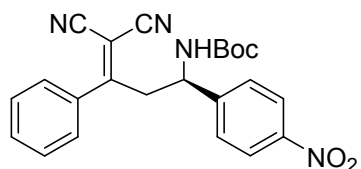

Colorless solid, 38.5 mg, 92% yield, **m.p.** = 46-47°C,  $[\alpha]_{\text{D}}^{25} = +12.3$  ( $c = 0.57$ ,  $\text{CHCl}_3$ ). The ee value was 98%

(Chiralpak AD-H, hexane/*i*-PrOH = 80:20, 230 nm, 1 mL/min,  $t_{\text{major}} = 18.407$  min.,  $t_{\text{minor}} = 9.091$  min).

$^1\text{H NMR}$  (300 MHz,  $\text{CDCl}_3$ )  $\delta$  8.24 (d,  $J = 8.3$  Hz, 2H), 7.72 – 7.52 (m, 3H), 7.515 – 7.415 (m, 2H), 7.36 (d,  $J = 8.2$  Hz, 2H), 4.83 (d,  $J = 19.6$  Hz, 2H), 3.72 – 3.54 (m, 1H), 3.40 (dd,  $J = 13.4, 6.1$  Hz, 1H), 1.44 (s, 9H).

$^{13}\text{C NMR}$  (101 MHz,  $\text{CDCl}_3$ )  $\delta$  177.82, 154.56, 147.83, 146.53, 133.80, 132.66, 129.51, 127.82, 127.38, 124.35, 112.09, 82.74, 80.96, 53.44, 43.88, 28.23.

**HRMS** (ESI): calculated for  $(\text{C}_{23}\text{H}_{23}\text{N}_3\text{NaO}_2)^+$ : 396.1682, found 396.1680.

tert-butyl (R)-(4,4-dicyano-1-(4-cyanophenyl)-3-phenylbut-3-en-1-yl)carbamate (**4m**)

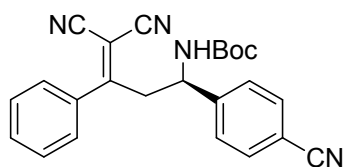

Colorless solid, 37.5 mg, 94% yield, **m.p.** = 52-53°C,  $[\alpha]_{\text{D}}^{25} = +14.1$  ( $c = 0.57$ ,  $\text{CHCl}_3$ ). The ee value was 97% (Chiralpak AD-H, hexane/*i*-PrOH = 80:20, 230 nm, 1 mL/min,  $t_{\text{major}} = 21.024$  min.,  $t_{\text{minor}} = 9.052$  min).

$^1\text{H NMR}$  (300 MHz,  $\text{CDCl}_3$ )  $\delta$  7.73 – 7.60 (m, 2H), 7.60 – 7.48 (m, 3H), 7.48 – 7.34 (m, 2H), 7.29 – 7.23 (m, 2H), 4.82 (d,  $J = 7.4$  Hz, 1H), 4.69 (q,  $J = 15.0, 8.2$  Hz, 1H), 3.73 – 3.45 (m, 1H), 3.34 (dd,  $J = 13.7, 6.2$  Hz, 1H), 1.40 (s, 9H).

$^{13}\text{C NMR}$  (126 MHz,  $\text{CDCl}_3$ )  $\delta$  174.92, 154.70, 133.86, 132.91, 132.60, 129.46, 127.82, 127.20, 118.14, 112.53, 112.13, 81.12, 77.25, 53.60, 43.89, 28.24.

**HRMS** (ESI): calculated for  $(\text{C}_{24}\text{H}_{22}\text{N}_4\text{NaO}_2)^+$ : 421.1635, found 421.1637.

tert-butyl (R)-(4,4-dicyano-3-phenyl-1-(thiophen-2-yl)but-3-en-1-yl)carbamate (**4n**)

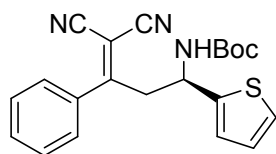

Colorless oil, 37.6 mg, 99% yield,  $[\alpha]_{\text{D}}^{25} = +26.4$  ( $c = 0.56$ ,  $\text{CHCl}_3$ ). The ee value was 82% (Chiralpak AD-H, hexane/*i*-PrOH = 80:20, 230 nm, 1 mL/min,  $t_{\text{major}} = 7.446$  min.,  $t_{\text{minor}} =$

6.588 min).

$^1\text{H NMR}$  (300 MHz,  $\text{CDCl}_3$ )  $\delta$  7.74 – 7.35 (m, 5H), 7.24 – 7.22 (m, 1H), 7.10 – 6.90 (m, 1H), 6.896 – 6.652 (m, 1H), 5.04 – 4.61 (m, 2H), 3.80 – 3.63 (m, 1H), 3.45 (dd,  $J = 13.8$ , 6.8 Hz, 1H), 1.43 (s, 9H).

$^{13}\text{C NMR}$  (126 MHz,  $\text{CDCl}_3$ )  $\delta$  177.73, 162.29, 142.37, 133.89, 132.29, 129.22, 127.95, 127.17, 125.43, 125.06, 112.31, 80.55, 78.59, 49.35, 44.61, 28.29.

**HRMS** (ESI): calculated for  $(\text{C}_{21}\text{H}_{21}\text{N}_3\text{NaO}_2\text{S})^+$ : 402.1247, found 402.1248.

tert-butyl (S)-(5,5-dicyano-1,4-diphenylpent-4-en-2-yl)carbamate (**4o**)

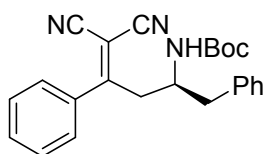

Colorless solid, 35.3 mg, 91% yield, **m.p.** = 125-126 °C,  $[\alpha]_D^{25} = +51.2$  ( $c = 0.5$ ,  $\text{CHCl}_3$ ). The ee value was 76% (Chiralpak AD-H, hexane/*i*-PrOH = 80:20, 230 nm, 1 mL/min,  $t_{\text{major}} = 6.309$  min.,  $t_{\text{minor}} = 5.397$  min).

$^1\text{H NMR}$  (300 MHz,  $\text{CDCl}_3$ )  $\delta$  7.47 – 7.35 (m, 5H), 7.35 – 7.29 (m, 3H), 7.29 – 7.25 (m, 2H), 5.06 – 5.00 (m, 1H), 4.85 (d,  $J = 9.0$  Hz, 1H), 3.38 – 3.33 (m, 1H), 3.05 (t, 2H), 2.16 – 2.11 (m, 1H), 1.42 (s, 9H).

$^{13}\text{C NMR}$  (101 MHz,  $\text{CDCl}_3$ )  $\delta$  183.24, 153.55, 145.69, 136.78, 134.75, 129.17, 128.68, 128.08, 127.44, 122.66, 115.80, 80.75, 71.22, 49.42, 48.02, 32.53, 27.85.

**HRMS** (ESI): calculated for  $(\text{C}_{24}\text{H}_{25}\text{N}_3\text{NaO}_2)^+$ : 410.1839, found 410.1834.

tert-butyl (R)-(4,4-dicyano-3-(2-methoxyphenyl)-1-phenylbut-3-en-1-yl)carbamate (**4p**)

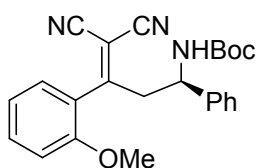

Colorless solid, 34.7 mg, 86% yield, **m.p.** = 39-40 °C,  $[\alpha]_D^{25} = +22.0$  ( $c = 0.5$ ,  $\text{CHCl}_3$ ). The ee value was 77% (Chiralpak AD-H, hexane/*i*-PrOH = 80:20, 230 nm, 1 mL/min,  $t_{\text{major}} = 9.429$  min.,  $t_{\text{minor}} = 6.331$  min).

**<sup>1</sup>H NMR** (300 MHz, cdcl<sub>3</sub>) δ 7.50 – 7.34 (m, 1H), 7.33 – 7.24 (m, 2H), 7.18 – 7.00 (m, 4H), 6.98 – 6.75 (m, 2H), 4.73 (d, 1H), 4.63 (q, 1H), 3.81 (s, 3H), 3.65 – 3.46 (m, 1H), 3.41 (dd, *J* = 14.2, 6.5 Hz, 1H), 1.39 (s, 9H).

**<sup>13</sup>C NMR** (101 MHz, CDCl<sub>3</sub>) δ 171.56, 155.89, 146.79, 133.01, 130.20, 129.86, 128.94, 128.75, 126.83, 126.35, 121.01, 120.56, 110.78, 82.75, 78.67, 63.78, 55.47, 43.61, 27.88.

**HRMS** (ESI): calculated for (C<sub>24</sub>H<sub>25</sub>N<sub>3</sub>NaO<sub>3</sub>)<sup>+</sup>: 426.1788, found 426.1788.

tert-butyl (R)-(3-(2-bromophenyl)-4,4-dicyano-1-phenylbut-3-en-1-yl)carbamate (**4q**)

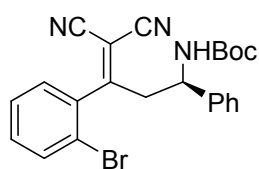

Colorless oil, 40.3 mg, 89% yield, [ $\alpha$ ]<sub>D</sub><sup>25</sup> = +20.0 (*c* = 0.57, CHCl<sub>3</sub>). The ee value was 70% (Chiralpak AD-H, hexane/*i*-PrOH = 95:5, 230 nm, 1 mL/min, *t*<sub>major</sub> = 18.702 min., *t*<sub>minor</sub> = 13.024 min).

**<sup>1</sup>H NMR** (300 MHz, cdcl<sub>3</sub>) δ 7.72 – 7.64 (m, 1H), 7.64 – 7.42 (m, 1H), 7.42 – 7.26 (m, 4H), 7.26 – 7.14 (m, 3H), 5.12 – 4.57 (m, 2H), 3.66 – 3.39 (m, 1H), 3.29 (dd, 1H), 1.46 (s, 9H).

**<sup>13</sup>C NMR** (126 MHz, CDCl<sub>3</sub>) δ 176.82, 155.17, 136.01, 133.76, 132.04, 131.81, 129.18, 128.40, 128.14, 127.76, 126.14, 119.64, 111.10, 91.11, 80.57, 52.67, 44.74, 28.30.

**HRMS** (ESI): calculated for (C<sub>23</sub>H<sub>22</sub>BrN<sub>3</sub>NaO<sub>2</sub>)<sup>+</sup>: 474.0788, found 474.0786.

tert-butyl (R)-(4,4-dicyano-3-(3-methoxyphenyl)-1-phenylbut-3-en-1-yl)carbamate (**4r**)

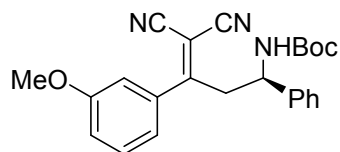

Colorless solid, 33.1 mg, 82% yield, **m.p.** = 38-39 °C, [ $\alpha$ ]<sub>D</sub><sup>25</sup> = +35.1 (*c* = 0.65, CHCl<sub>3</sub>). The ee value was 86% (Chiralpak OD-H, hexane/*i*-PrOH = 80:20, 230 nm, 1 mL/min, *t*<sub>major</sub> = 6.648 min, *t*<sub>minor</sub> = 6.092 min).

<sup>1</sup>H NMR (300 MHz, cdcl<sub>3</sub>) δ 7.46 – 7.39 (m, 1H), 7.39 – 7.30 (m, 3H), 7.21 – 7.12 (m, 2H), 7.11 – 6.92 (m, 3H), 4.84 (d, *J* = 8.0 Hz, 1H), 4.64 (q, *J* = 14.1, 6.3 Hz, 1H), 3.85 (s, 3H), 3.77 – 3.55 (m, 1H), 3.36 (dd, *J* = 13.5, 6.9 Hz, 1H), 1.44 (s, 9H).

<sup>13</sup>C NMR (101 MHz, CDCl<sub>3</sub>) δ 175.91, 159.78, 154.81, 139.16, 135.28, 130.35, 129.14, 128.62, 126.48, 120.07, 118.35, 113.26, 112.49, 83.80, 80.23, 55.49, 54.12, 44.35, 28.30.

HRMS (ESI): calculated for (C<sub>24</sub>H<sub>25</sub>N<sub>3</sub>NaO<sub>3</sub>)<sup>+</sup>: 426.1788, found 426.1788.

tert-butyl (R)-(3-(3-chlorophenyl)-4,4-dicyano-1-phenylbut-3-en-1-yl)carbamate (**4s**)

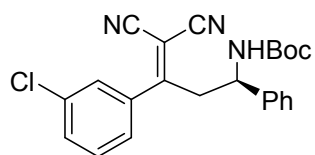

Colorless solid, 32.6 mg, 80% yield, **m.p.** = 39-40 °C, **[α]<sub>D</sub><sup>25</sup>** = +39.6 (*c* = 0.5, CHCl<sub>3</sub>). The ee value was 71% (Chiralpak AS-H, hexane/*i*-PrOH = 80:20, 230 nm, 1 mL/min, *t*<sub>major</sub> = 6.126 min, *t*<sub>minor</sub> = 5.261 min).

<sup>1</sup>H NMR (300 MHz, cdcl<sub>3</sub>) δ 7.56 – 7.46 (m, 2H), 7.43 – 7.32 (m, 5H), 7.22 – 7.08 (m, 2H), 4.85 (d, *J* = 7.8 Hz, 1H), 4.64 (q, *J* = 14.2, 6.9 Hz, 1H), 3.82 – 3.57 (m, 1H), 3.34 (dd, *J* = 13.5, 6.5 Hz, 1H), 1.45 (s, 9H).

<sup>13</sup>C NMR (101 MHz, CDCl<sub>3</sub>) δ 174.48, 154.86, 138.99, 135.95, 135.69, 135.29, 132.08, 130.55, 129.76, 129.26, 128.77, 126.40, 112.62, 87.91, 80.16, 53.92, 44.57, 28.30.

HRMS (ESI): calculated for (C<sub>23</sub>H<sub>22</sub>ClN<sub>3</sub>NaO<sub>2</sub>)<sup>+</sup>: 430.1293, found 430.1291.

tert-butyl (R)-(4,4-dicyano-3-(4-methoxyphenyl)-1-phenylbut-3-en-1-yl)carbamate (**4t**)

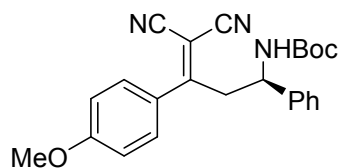

Colorless solid, 36.7 mg, 91% yield, **m.p.** = 44-45 °C, **[α]<sub>D</sub><sup>25</sup>** = +68.6 (*c* = 0.51, CHCl<sub>3</sub>). The ee value was 89% (Chiralpak AD-H, hexane/*i*-PrOH = 80:20, 230 nm, 1 mL/min, *t*<sub>major</sub> = 7.359 min, *t*<sub>minor</sub> = 6.597 min).

**<sup>1</sup>H NMR** (400 MHz, CDCl<sub>3</sub>) δ 7.54 (d, *J* = 8.3 Hz, 2H), 7.43 – 7.30 (m, 3H), 7.19 – 7.09 (m, 2H), 7.04 (d, *J* = 8.8 Hz, 2H), 4.89 (d, *J* = 6.1 Hz, 1H), 4.63 (q, *J* = 14.5, 7.2 Hz, 1H), 3.91 (s, 3H), 3.79 – 3.63 (m, 1H), 3.39 (dd, *J* = 13.7, 7.3 Hz, 1H), 1.47 (s, 9H).

**<sup>13</sup>C NMR** (101 MHz, CDCl<sub>3</sub>) δ 175.18, 163.09, 154.97, 139.02, 130.33, 129.14, 128.62, 126.48, 126.04, 114.66, 113.30, 83.80, 80.20, 55.57, 54.52, 43.83, 28.32.

**HRMS** (ESI): calculated for (C<sub>24</sub>H<sub>25</sub>N<sub>3</sub>NaO<sub>3</sub>)<sup>+</sup>: 426.1788, found 426.1786.

tert-butyl (R)-(4,4-dicyano-3-(4-fluorophenyl)-1-phenylbut-3-en-1-yl)carbamate (**4u**)

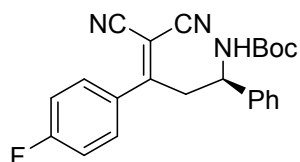

Colorless solid, 33.3 mg, 85% yield, **m.p.** = 35-36°C, [**a**]<sub>D</sub><sup>25</sup> = +89.2 (c = 0.37, CHCl<sub>3</sub>). The ee value was 91% (Chiralpak AS, hexane/*i*-PrOH = 90:10, 254 nm, 1 mL/min, *t*<sub>major</sub> = 8.751 min., *t*<sub>minor</sub> = 6.548 min).

**<sup>1</sup>H NMR** (300 MHz, cdcl<sub>3</sub>) δ 7.56 – 7.43 (m, 2H), 7.41 – 7.27 (m, 3H), 7.24 – 7.16 (m, 2H), 7.15 – 7.06 (m, 2H), 4.84 (d, *J* = 7.8 Hz, 1H), 4.56 (q, *J* = 15.2, 8.0 Hz, 1H), 3.78 – 3.60 (m, 1H), 3.36 (dd, *J* = 13.6, 7.0 Hz, 1H), 1.43 (s, 9H).

**<sup>13</sup>C NMR** (101 MHz, CDCl<sub>3</sub>) δ 174.71, 163.81 (d, *J* = 32.9 Hz), 155.06, 138.80, 130.57 (d, *J* = 9.2 Hz), 130.12, 129.26, 128.78, 126.46, 116.60 (d, *J* = 22.2 Hz), 112.43, 86.18, 80.38, 54.20, 44.33, 28.30.

**HRMS** (ESI): calculated for (C<sub>23</sub>H<sub>22</sub>FN<sub>3</sub>NaO<sub>2</sub>)<sup>+</sup>: 414.1588, found 414.1588.

tert-butyl ((1R,2R)-3-(dicyanomethylene)-2-methyl-1-phenylpentyl)carbamate (**4v**)

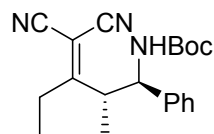

Colorless oil, 26.1 mg, 77% yield, [**a**]<sub>D</sub><sup>25</sup> = +80.8 (c = 0.5, CHCl<sub>3</sub>). The ee value was 83% (Chiralpak AD-H, hexane/*i*-PrOH = 95:5, 230 nm, 1 mL/min, major-*t*<sub>major</sub> = 11.793 min, *t*<sub>minor</sub> = 11.128 min, minor-*t*<sub>major</sub> = 6.704 min. *t*<sub>minor</sub> = 9.385min).



$^1\text{H}$  NMR (400 MHz,  $\text{CDCl}_3$ )  $\delta$  7.46 – 7.38 (m, 3H), 7.33 – 7.26 (m, 2H), 4.98 (d,  $J = 8.2$  Hz, 1H), 4.89 (t,  $J = 8.9$  Hz, 1H), 3.78 – 3.26 (m, 1H), 2.71 – 2.26 (m, 2H), 1.50 (s, 9H), 1.43 (d,  $J = 6.8$  Hz, 3H), 1.24 (t,  $J = 7.7$  Hz, 3H).

$^{13}\text{C}$  NMR (101 MHz,  $\text{CDCl}_3$ )  $\delta$  188.21, 155.24, 139.19, 129.26, 128.64, 126.43, 111.79, 111.45, 87.25, 80.40, 57.79, 48.46, 29.70, 28.30, 14.12, 13.70.

**HRMS** (ESI): calculated for  $(\text{C}_{20}\text{H}_{26}\text{N}_3\text{O}_2)^+$ : 340.2020, found 340.2027.

tert-butyl ((R)-((R)-2-(dicyanomethylene)cyclohexyl)(phenyl)methyl)carbamate (**4w**)

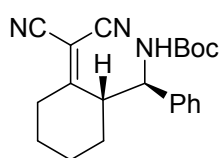

white solid, 25 mg, 71% yield, **m.p.** = 178-179 °C,  $[\alpha]_{\text{D}}^{25} = +79.6$  ( $c = 0.3$ ,  $\text{CHCl}_3$ ). The ee value was 93% (Chiralpak AD-H, hexane/*i*-PrOH = 95:5, 230 nm, 1 mL/min, major- $t_{\text{major}} = 17.708$  min,  $t_{\text{minor}} =$

16.507 min, minor- $t_{\text{major}} = 11.235$  min.  $t_{\text{minor}} = 13.904$  min).

$^1\text{H}$  NMR (300 MHz,  $\text{CDCl}_3$ )  $\delta$  7.41 – 7.39 (m, 3H), 7.34 – 7.29 (m, 2H), 5.20 (t, 1H), 4.86 (d, 1H), 3.59 – 3.54 (m, 1H), 3.53 – 3.06 (m, 2H), 2.43 (d,  $J = 12.8$  Hz, 1H), 1.66 – 1.63 (m, 1H), 1.41 – 1.35 (m, 4H), 1.32 (s, 9H).

$^{13}\text{C}$  NMR (101 MHz,  $\text{CDCl}_3$ )  $\delta$  183.62, 154.80, 139.40, 128.84, 127.31, 126.41, 112.62, 111.26, 89.25, 80.05, 55.54, 48.41, 31.58, 28.33, 28.20, 22.65, 16.55.

**HRMS** (ESI): calculated for  $(\text{C}_{21}\text{H}_{25}\text{N}_3\text{NaO}_2)^+$ : 374.1839, found 374.1837.

tert-butyl (R)-((R)-3-oxo-1,3-diphenylpropyl)carbamate (**5a**)

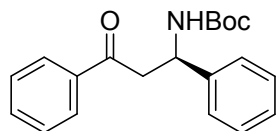

Colorless solid, 24.7 mg, 76% yield, **m.p.** = 39-40 °C,  $[\alpha]_{\text{D}}^{25} = +21.9$  ( $c = 0.53$ ,  $\text{CHCl}_3$ ). The ee value was 91% (Chiralpak AD-H, hexane/*i*-PrOH = 80:20, 230 nm, 1 mL/min,  $t_{\text{major}} = 11.479$  min.,  $t_{\text{minor}} = 10.026$  min).

**<sup>1</sup>H NMR** (300 MHz, cdcl<sub>3</sub>) δ 7.98 – 7.79 (m, 2H), 7.60 – 7.51 (m, 1H), 7.49 – 7.38 (m, 2H), 7.38 – 7.18 (m, 5H), 5.55 (d, *J* = 5.0 Hz, 1H), 5.25 (q, *J* = 12.3, 5.8 Hz, 1H), 3.81 – 3.55 (m, 1H), 3.44 (dd, *J* = 16.7, 6.1 Hz, 1H), 1.41 (s, 9H).

**<sup>13</sup>C NMR** (126 MHz, CDCl<sub>3</sub>) δ 184.50, 155.17, 146.54, 136.75, 133.33, 128.64, 128.59, 128.11, 127.31, 126.33, 79.73, 77.22, 44.30, 28.36.

**HRMS** (ESI): calculated for (C<sub>20</sub>H<sub>23</sub>NNaO<sub>3</sub>)<sup>+</sup>: 348.1570, found 348.1568.

### 5. NMR spectra of addition products 4a-4t and derivative 5a

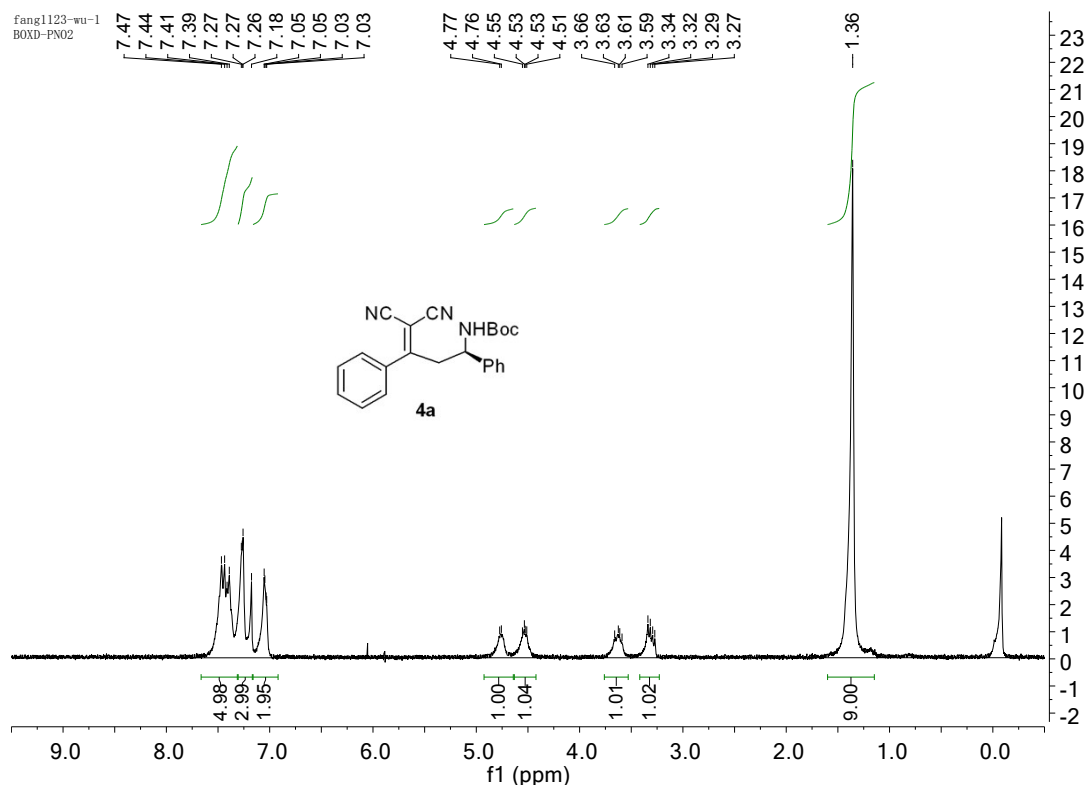

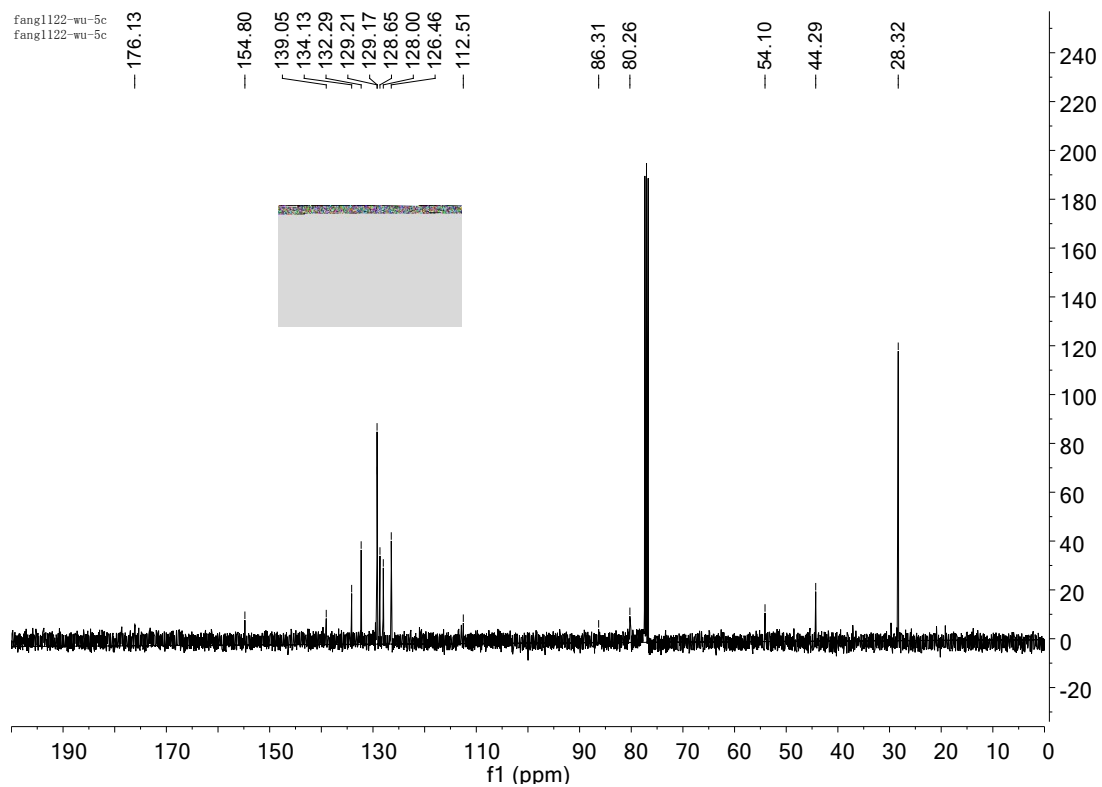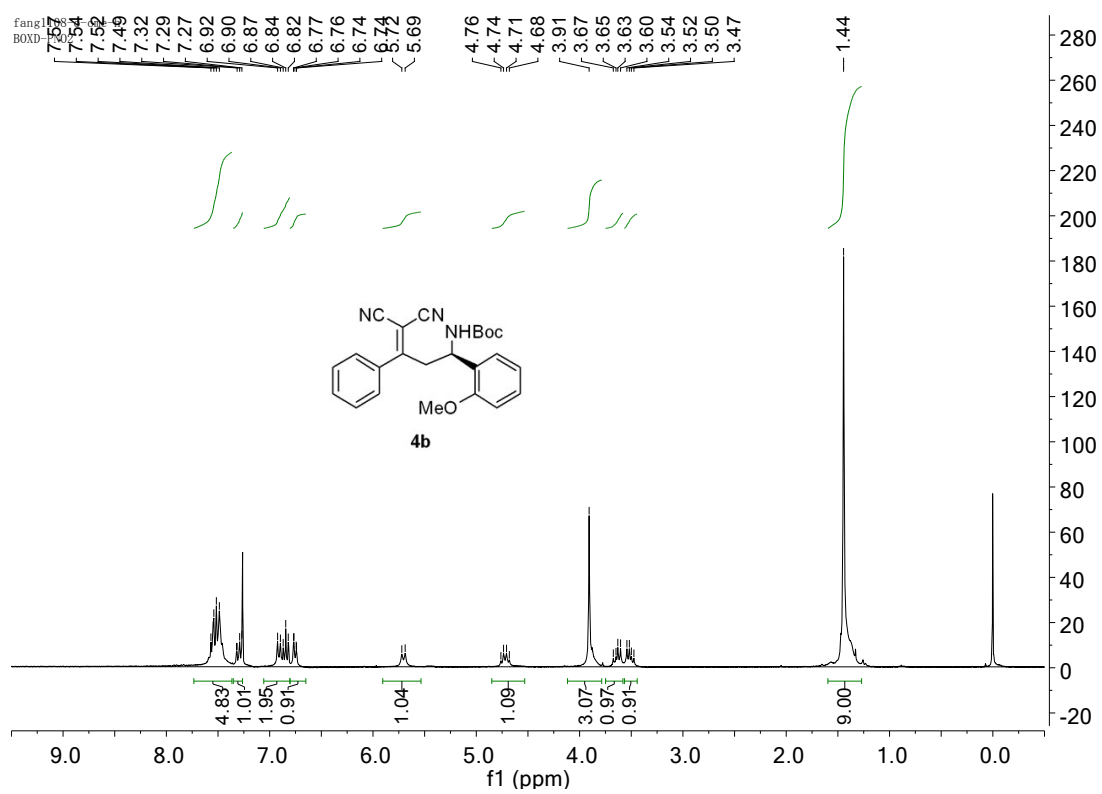

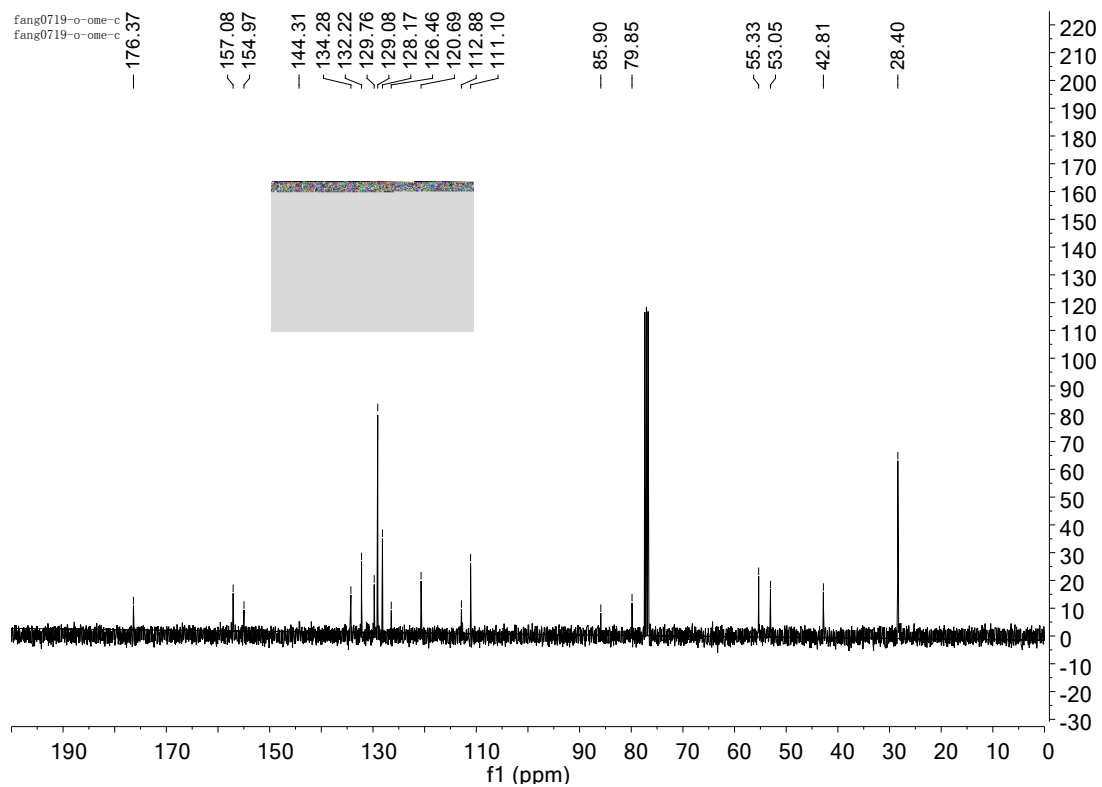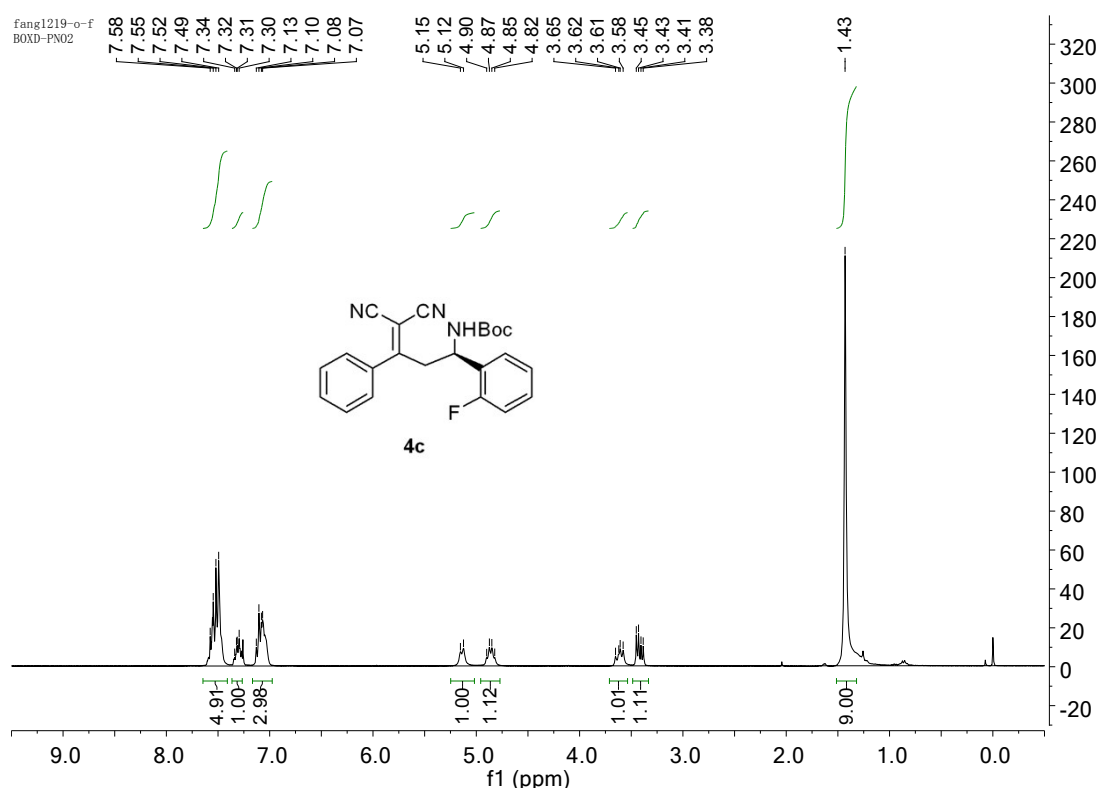

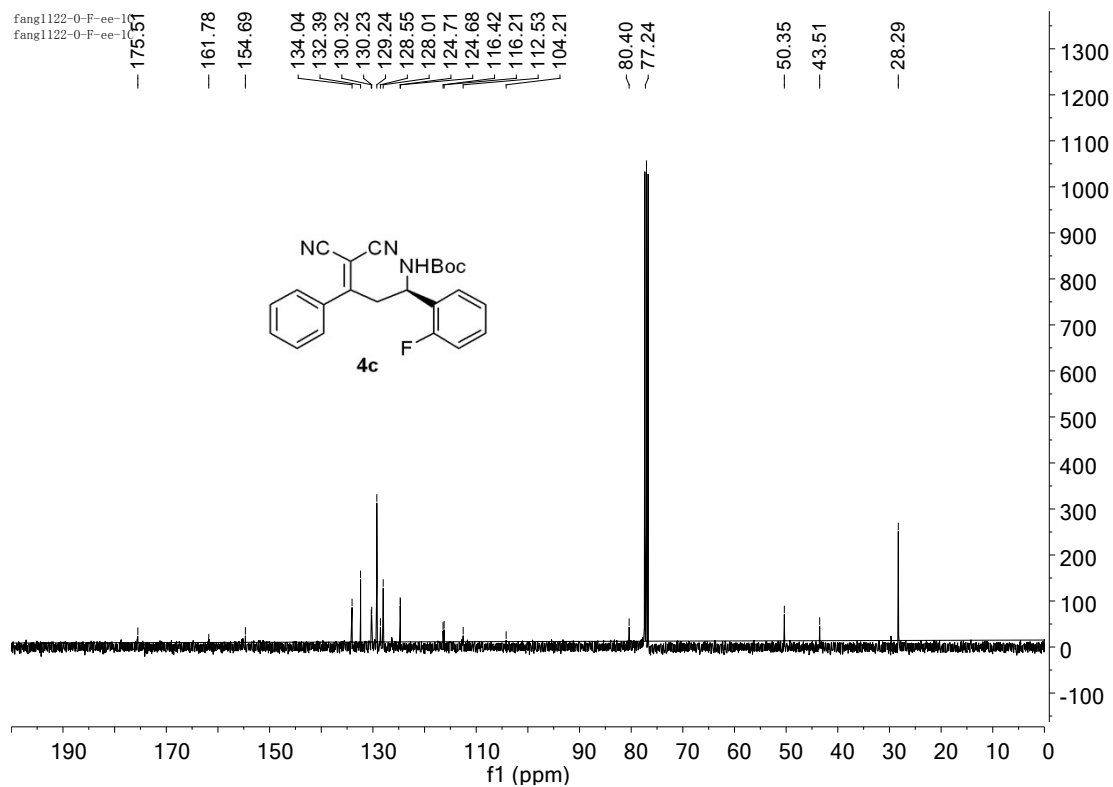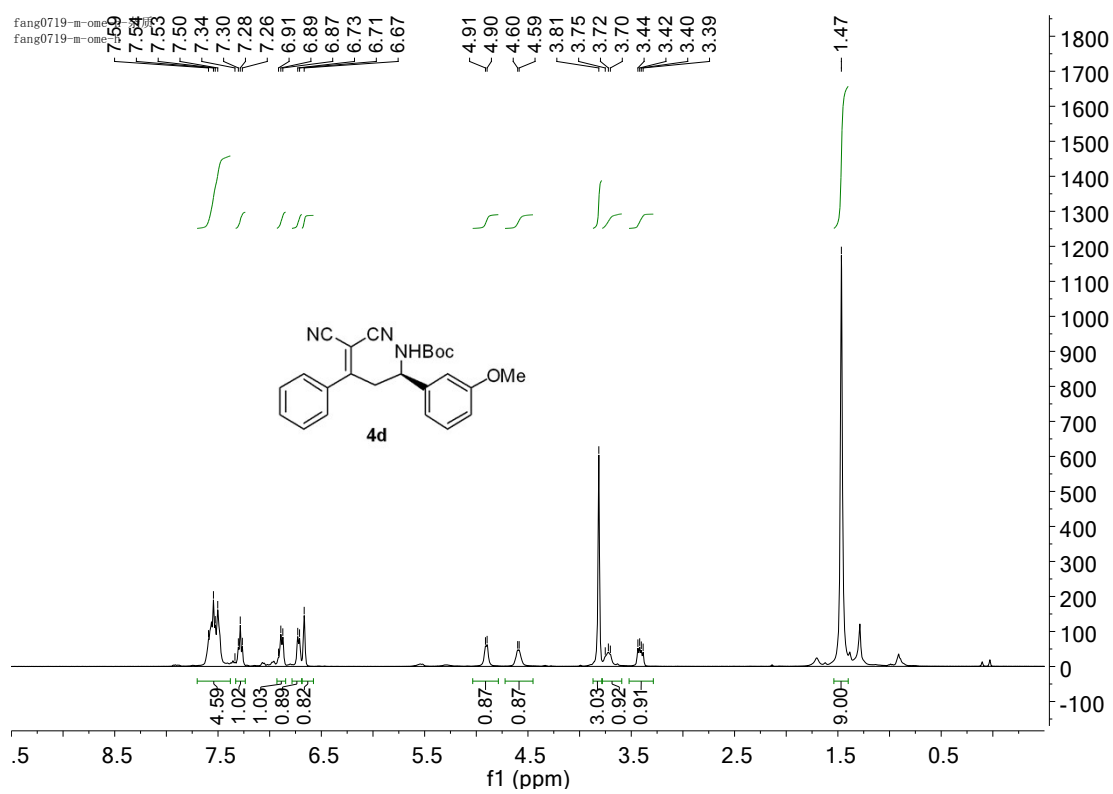

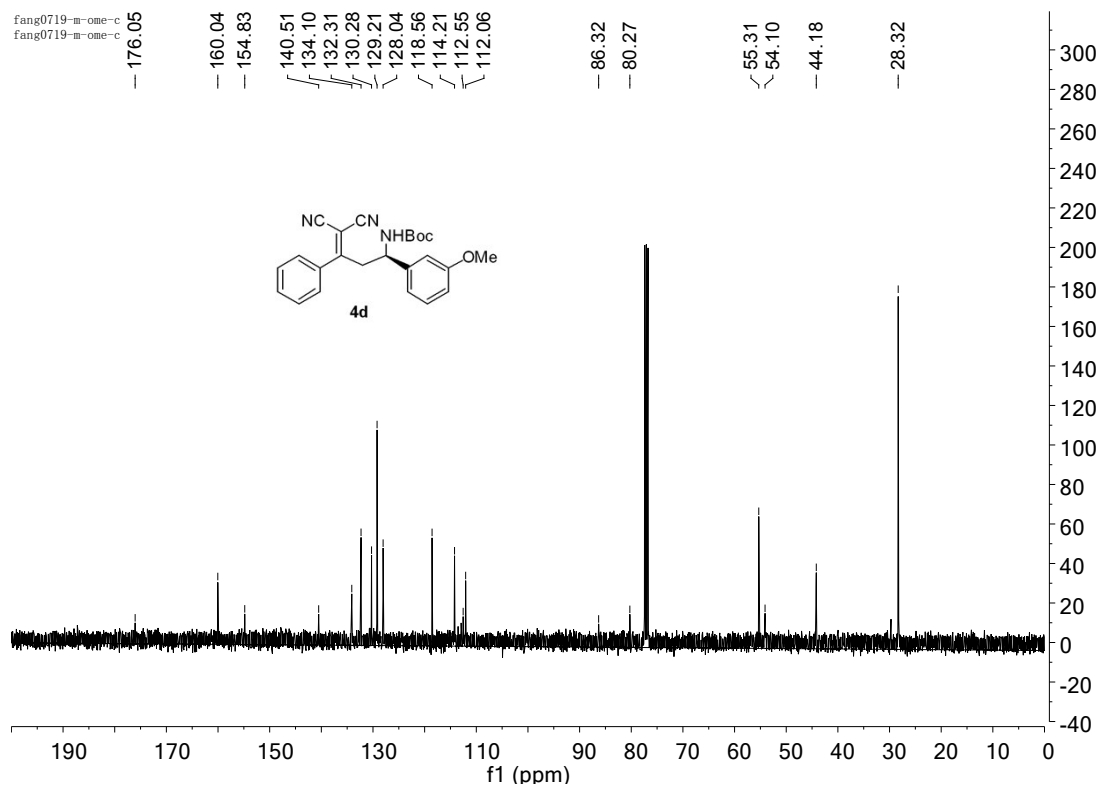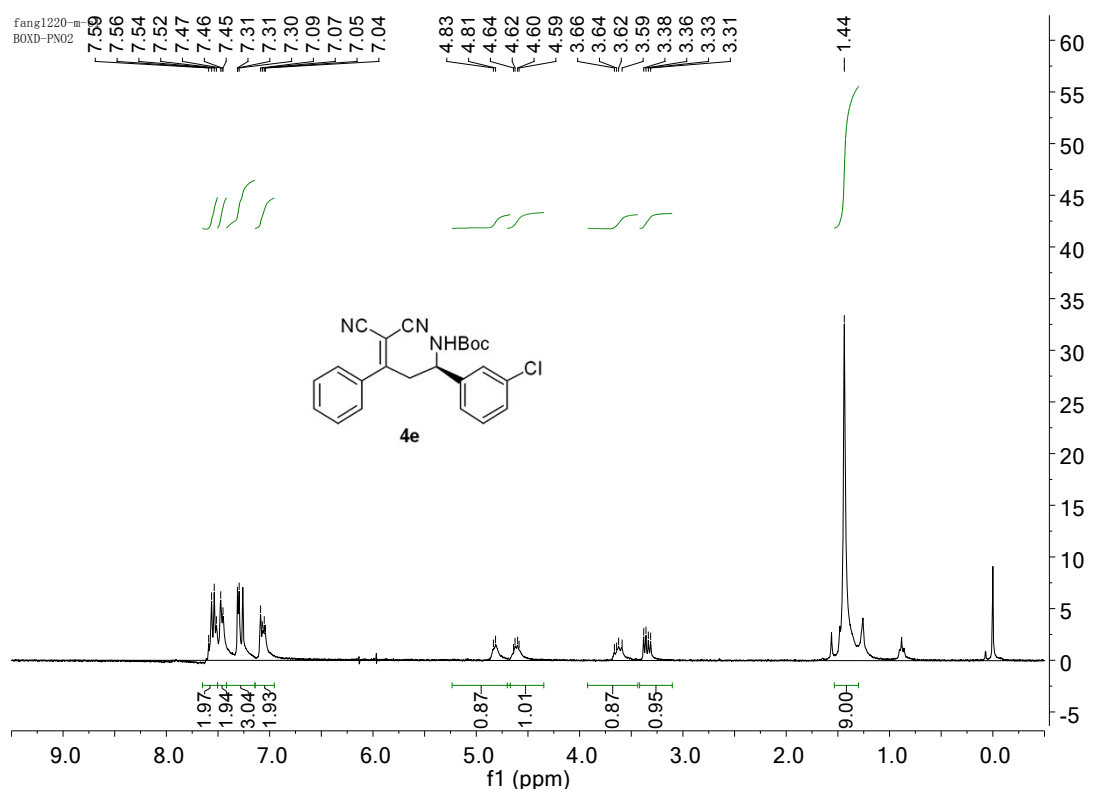

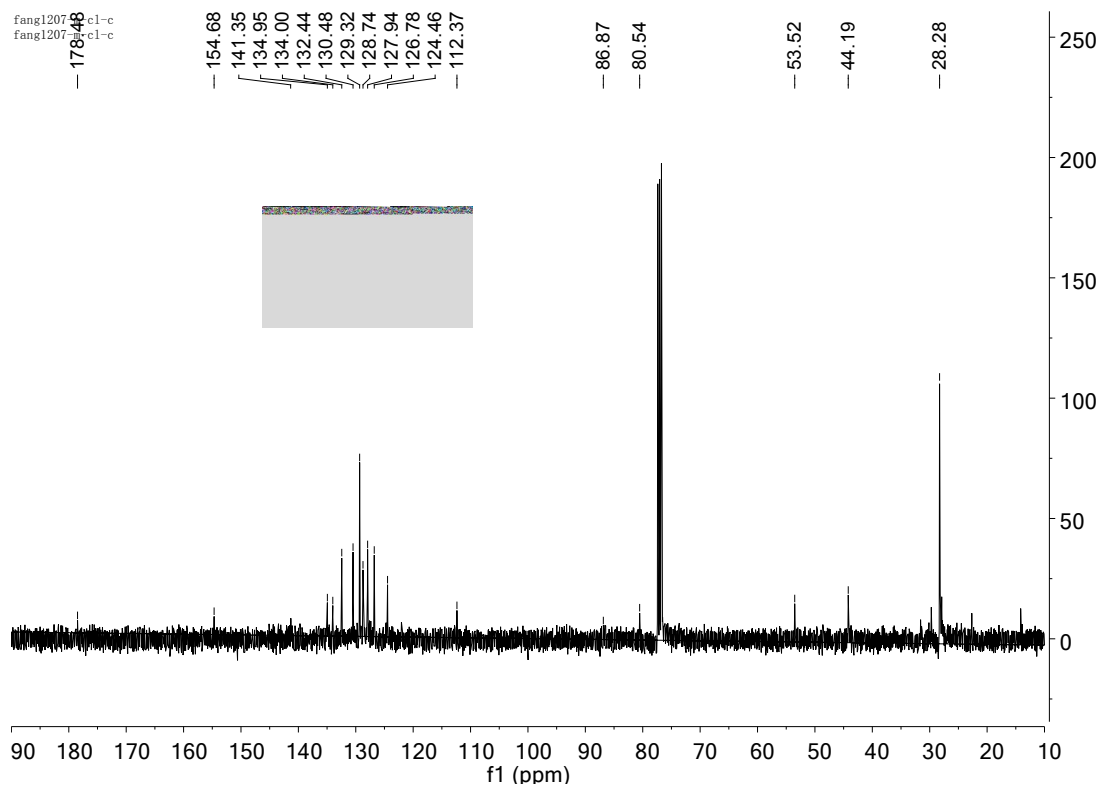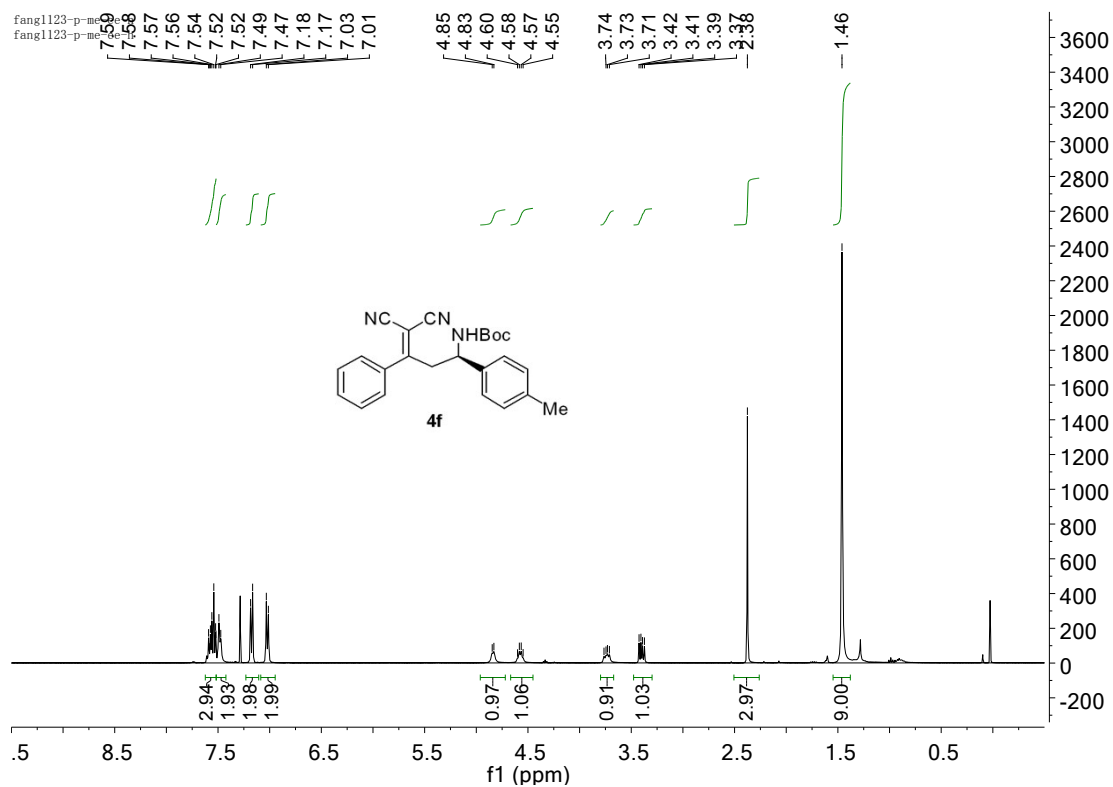

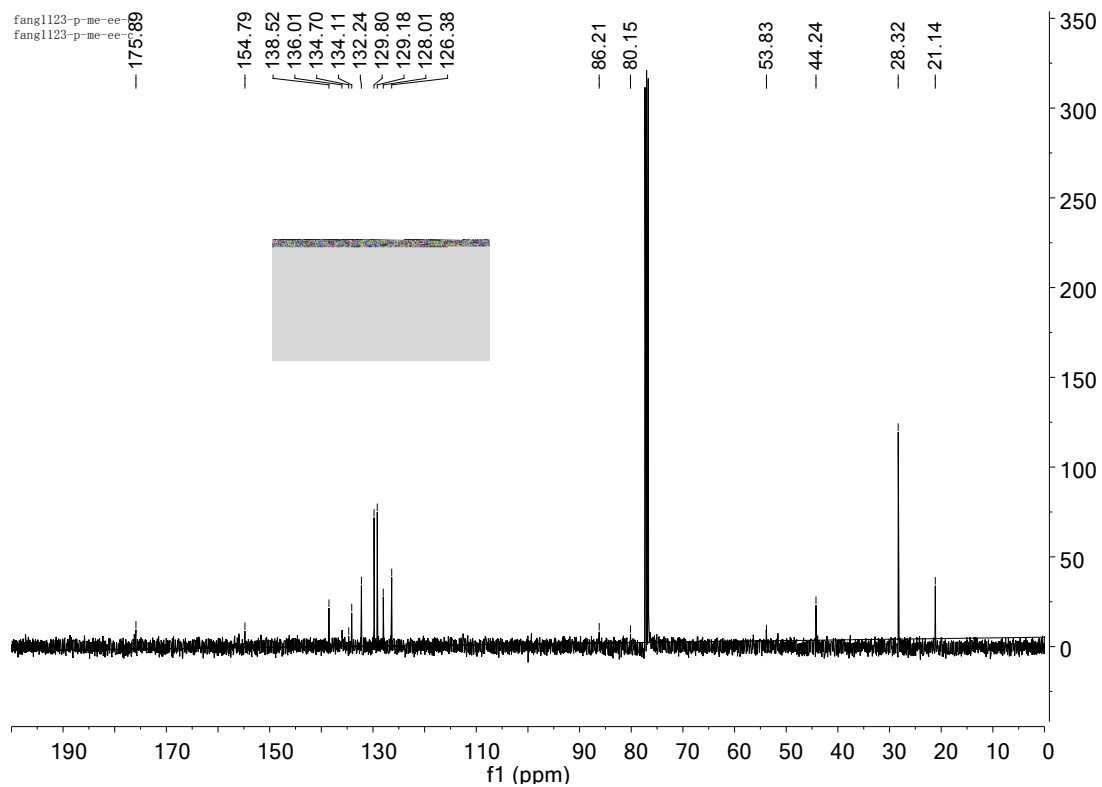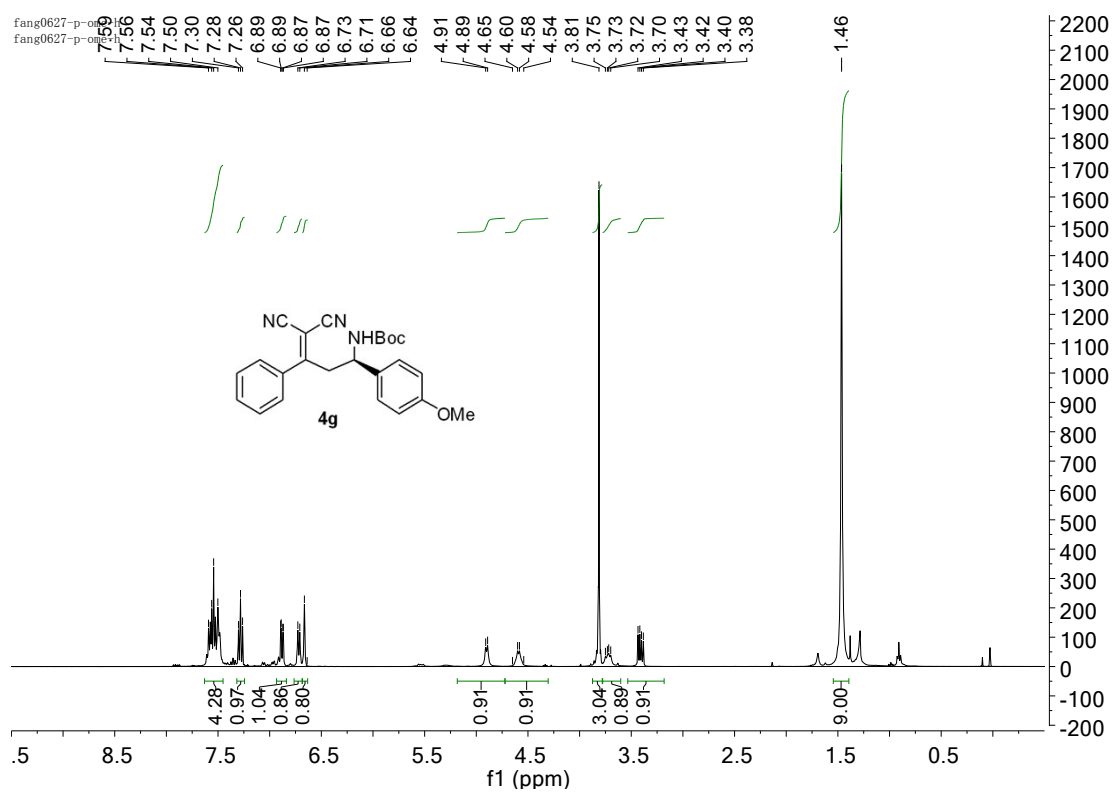



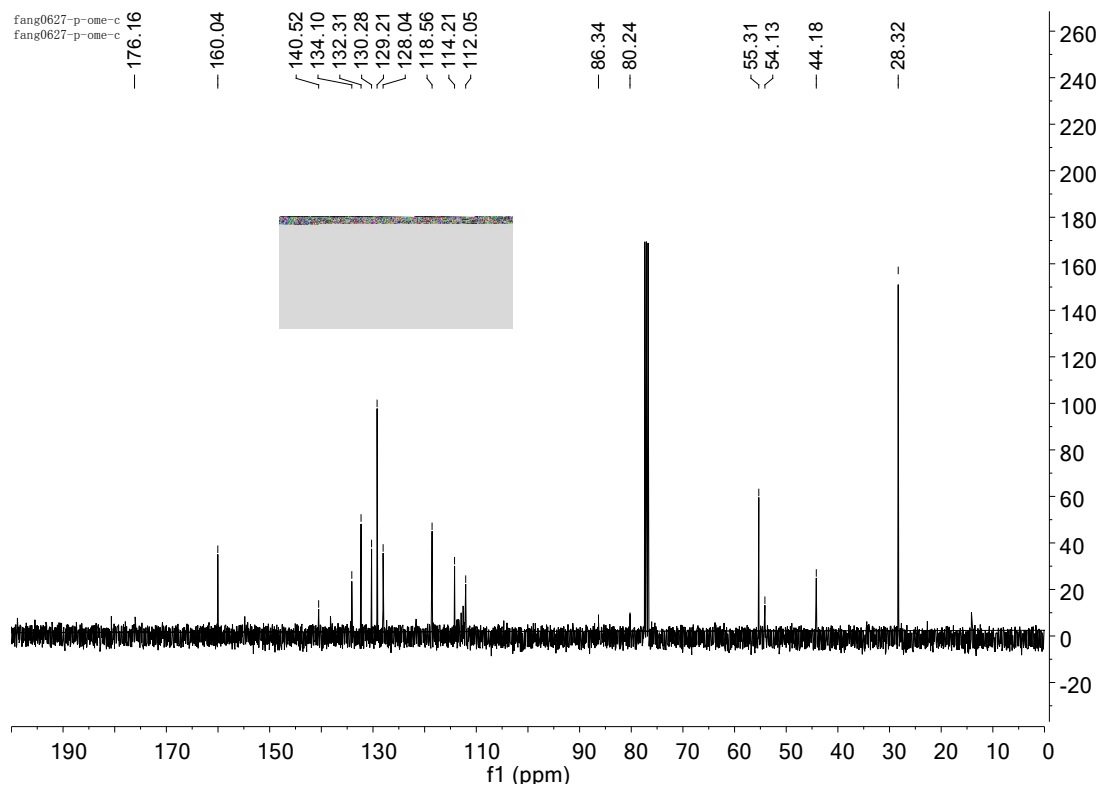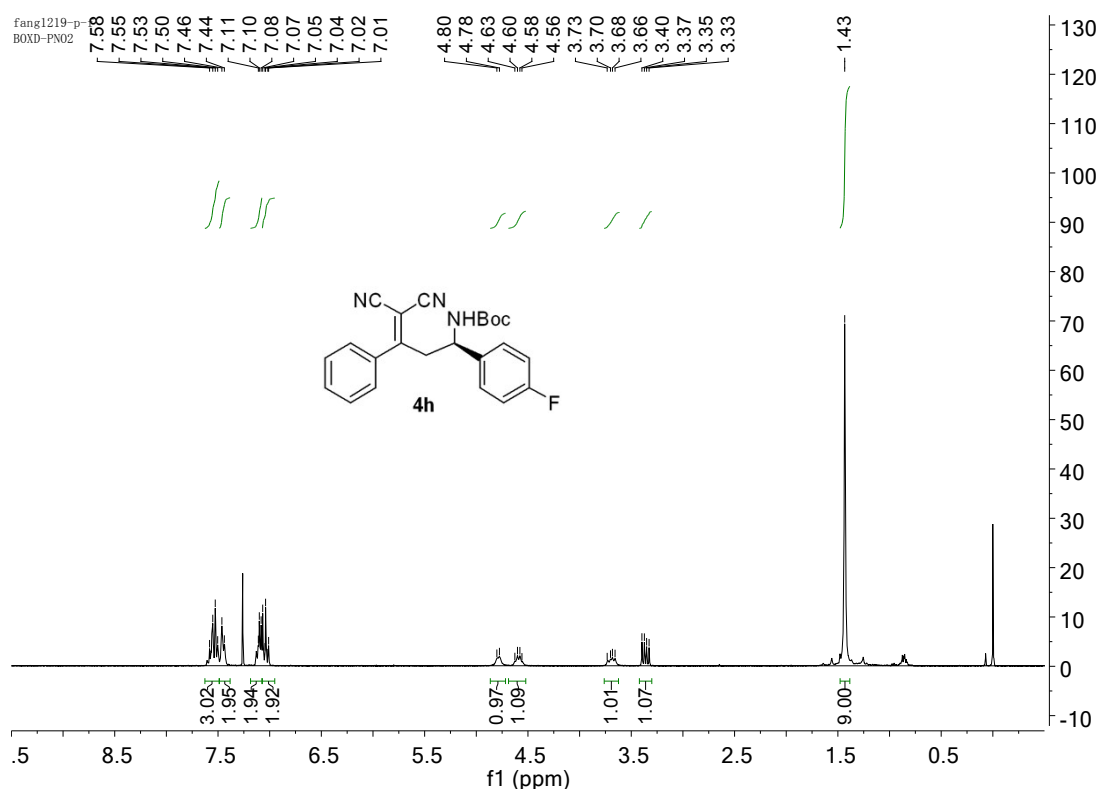

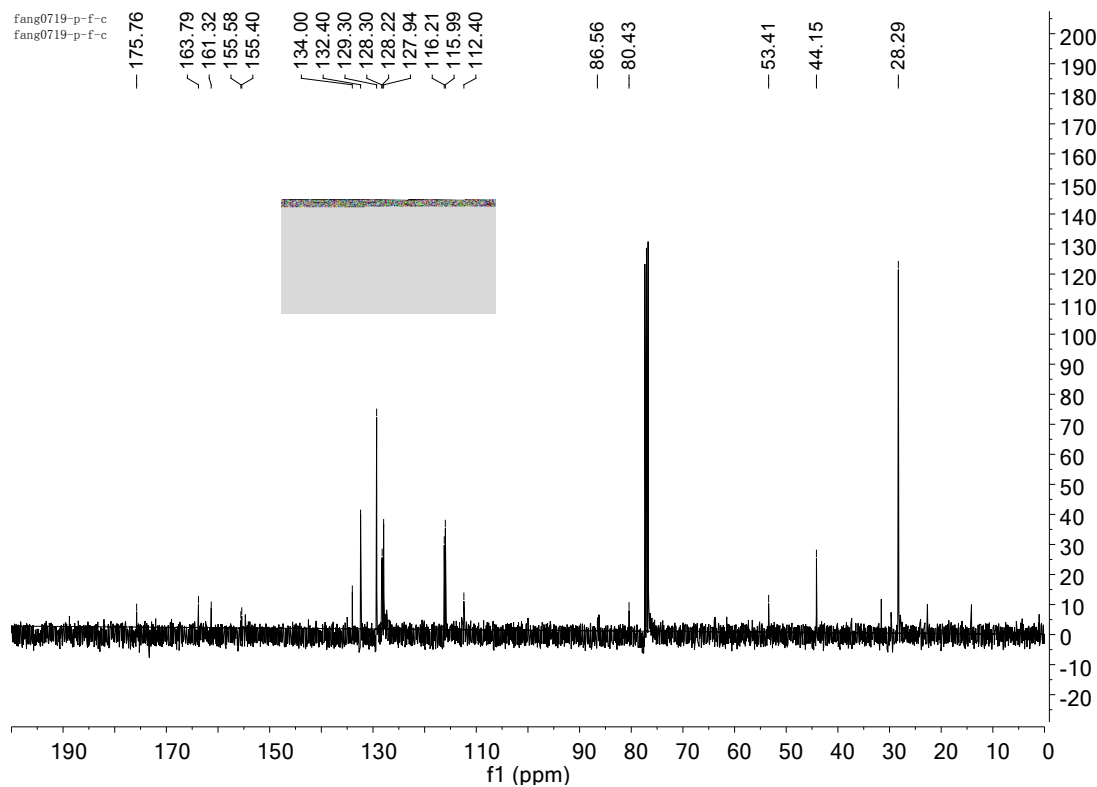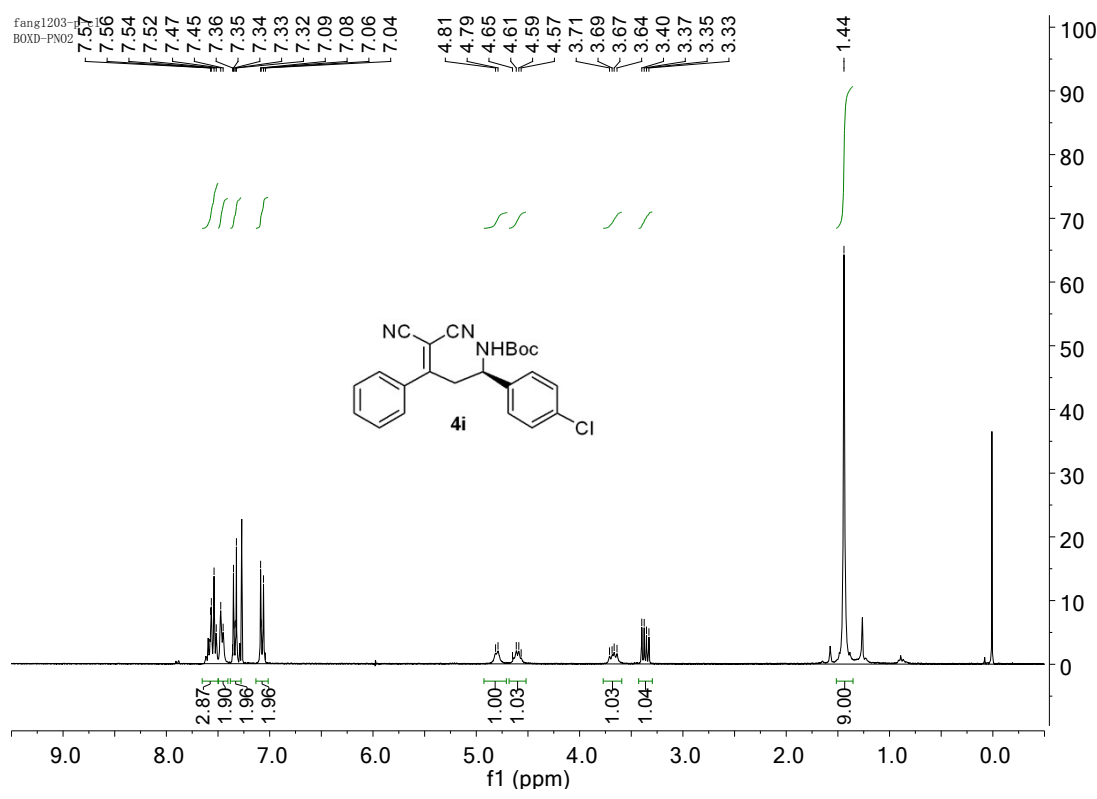

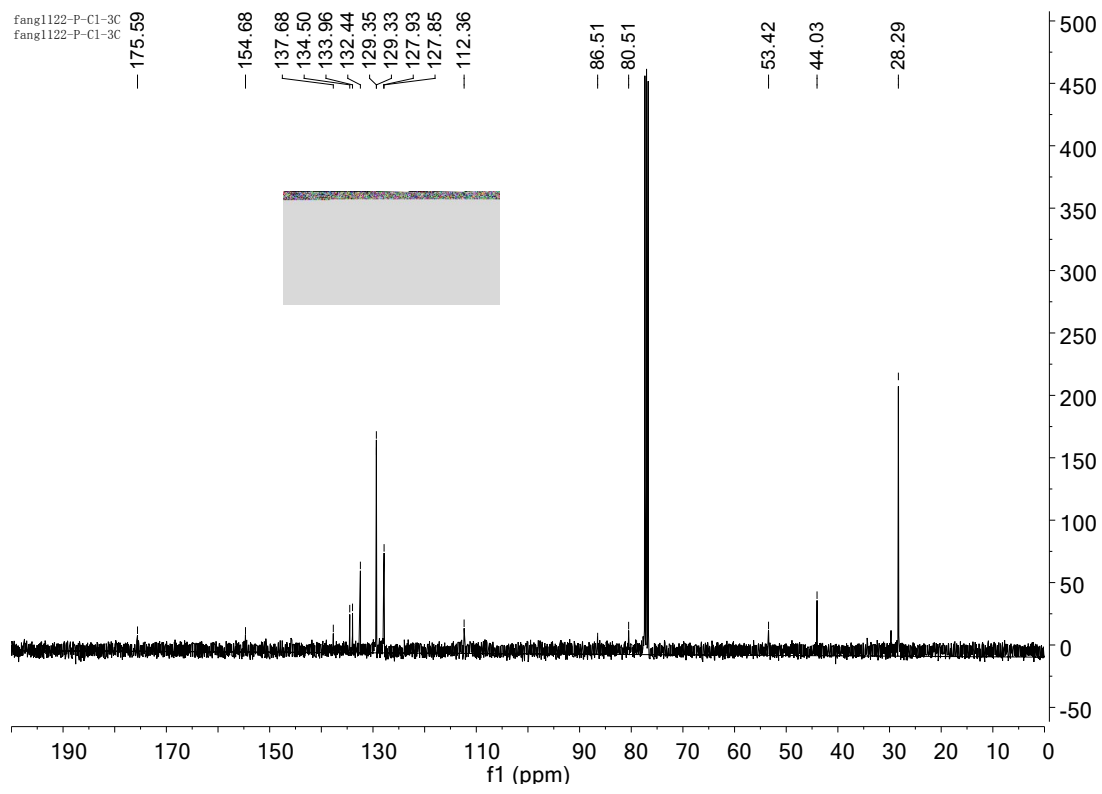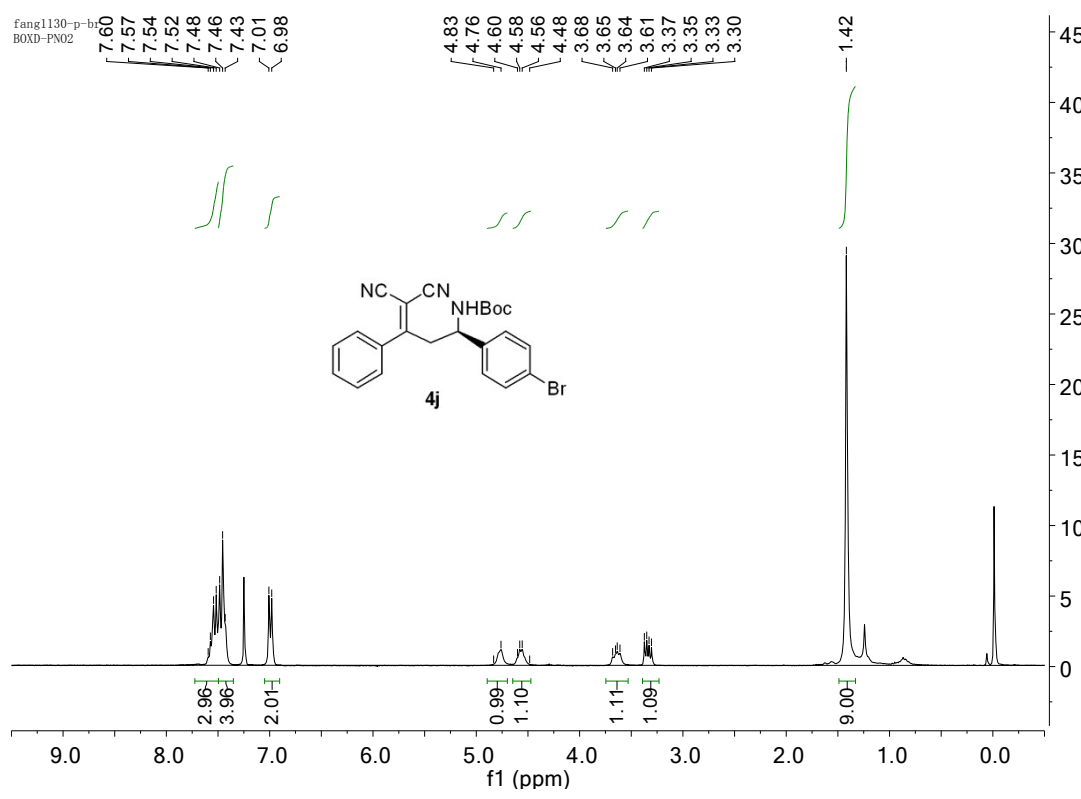

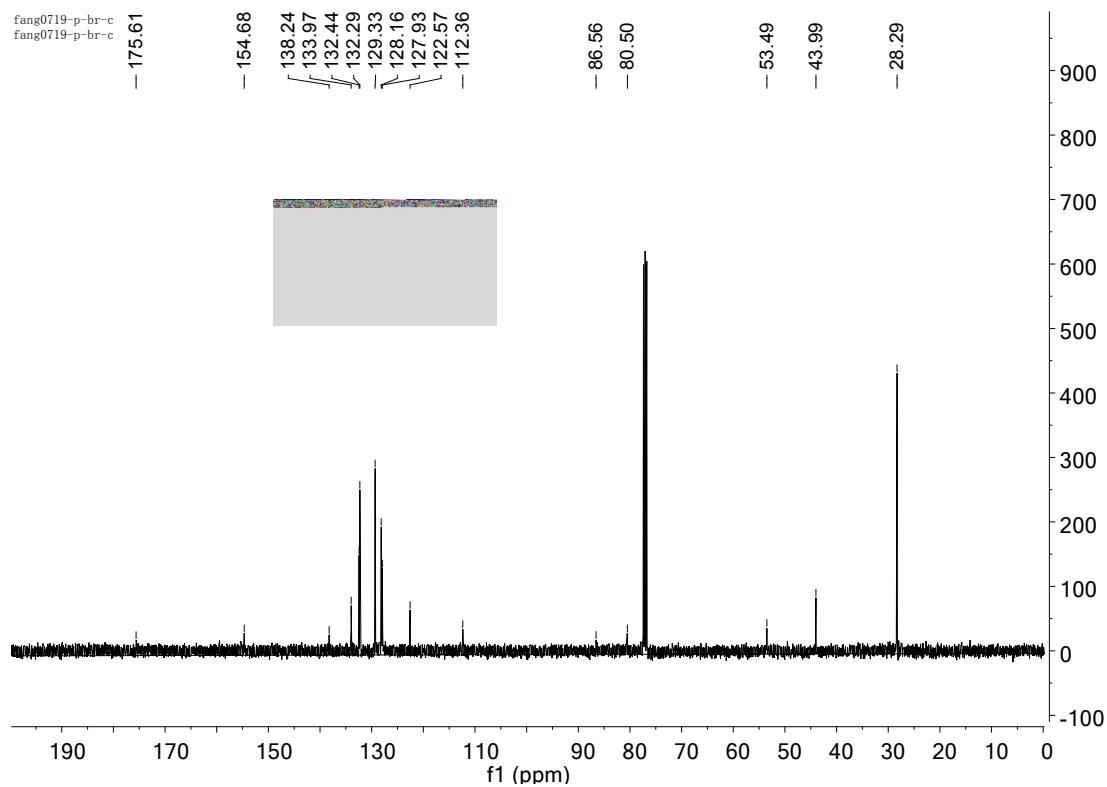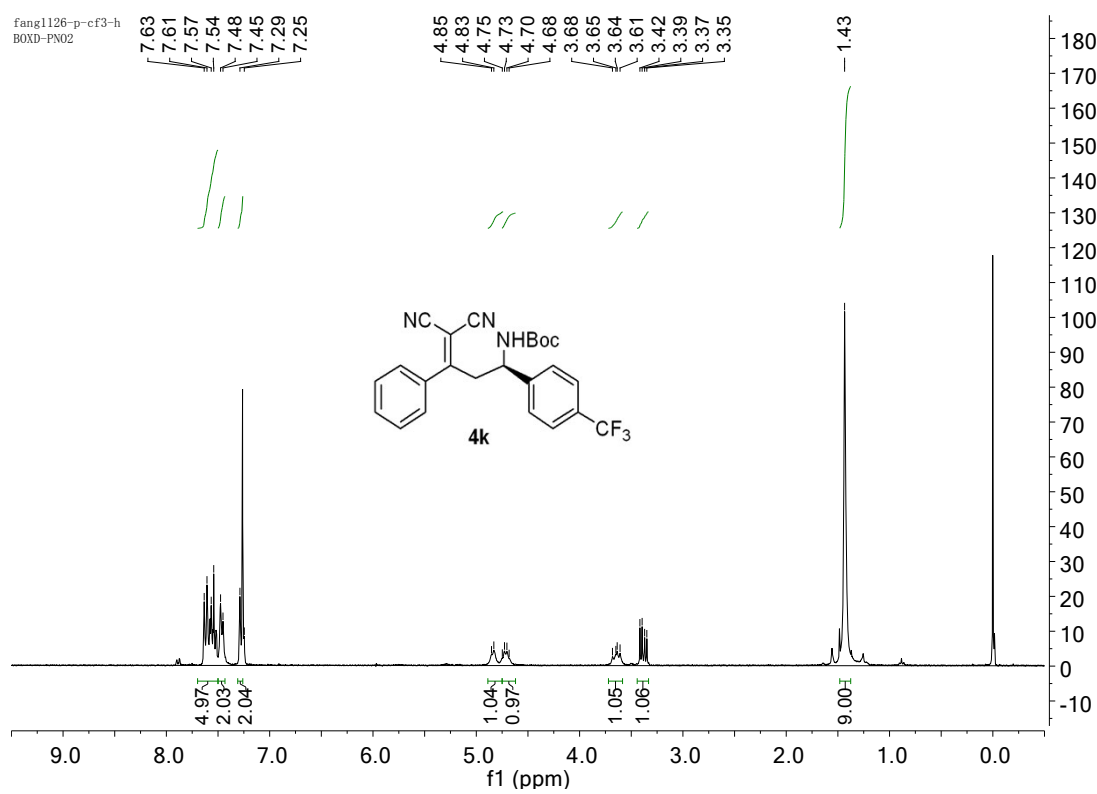

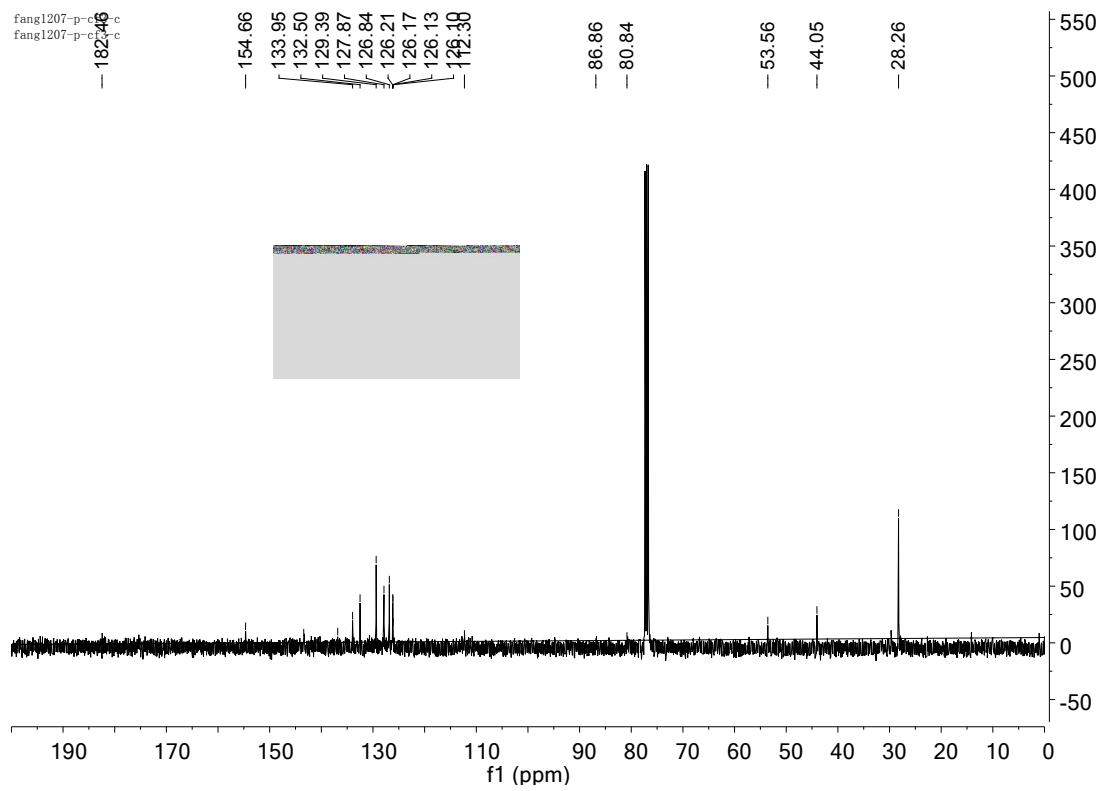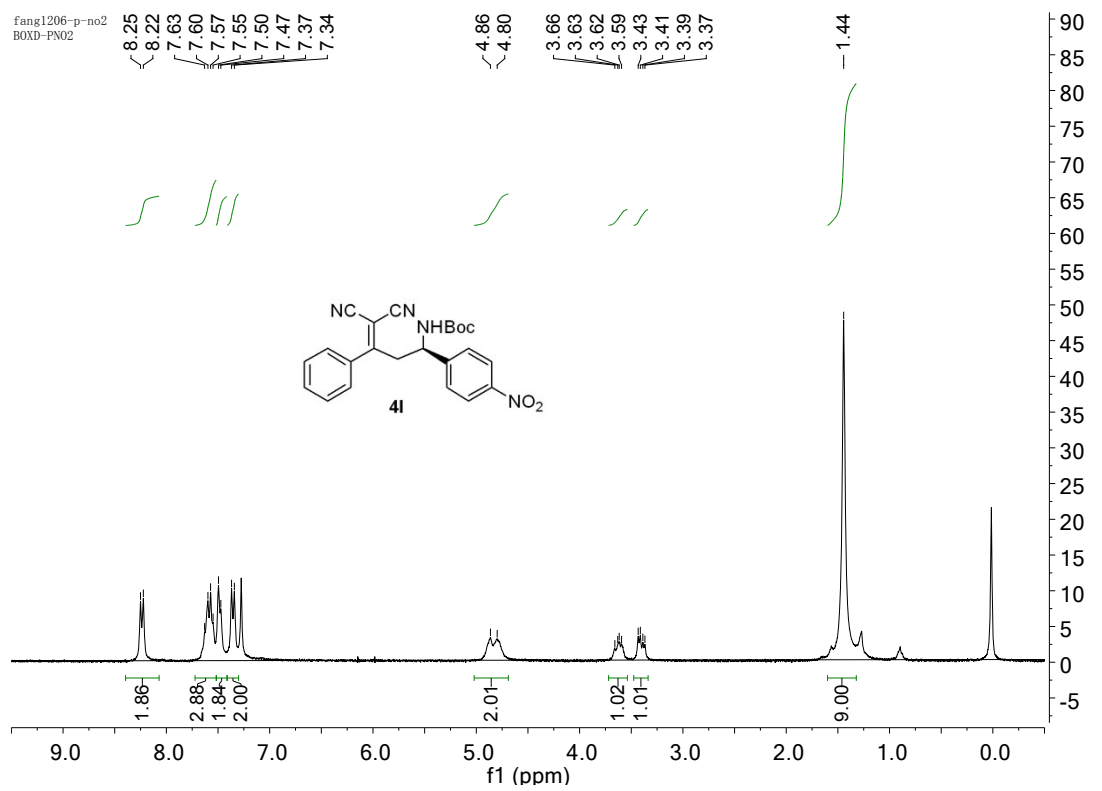

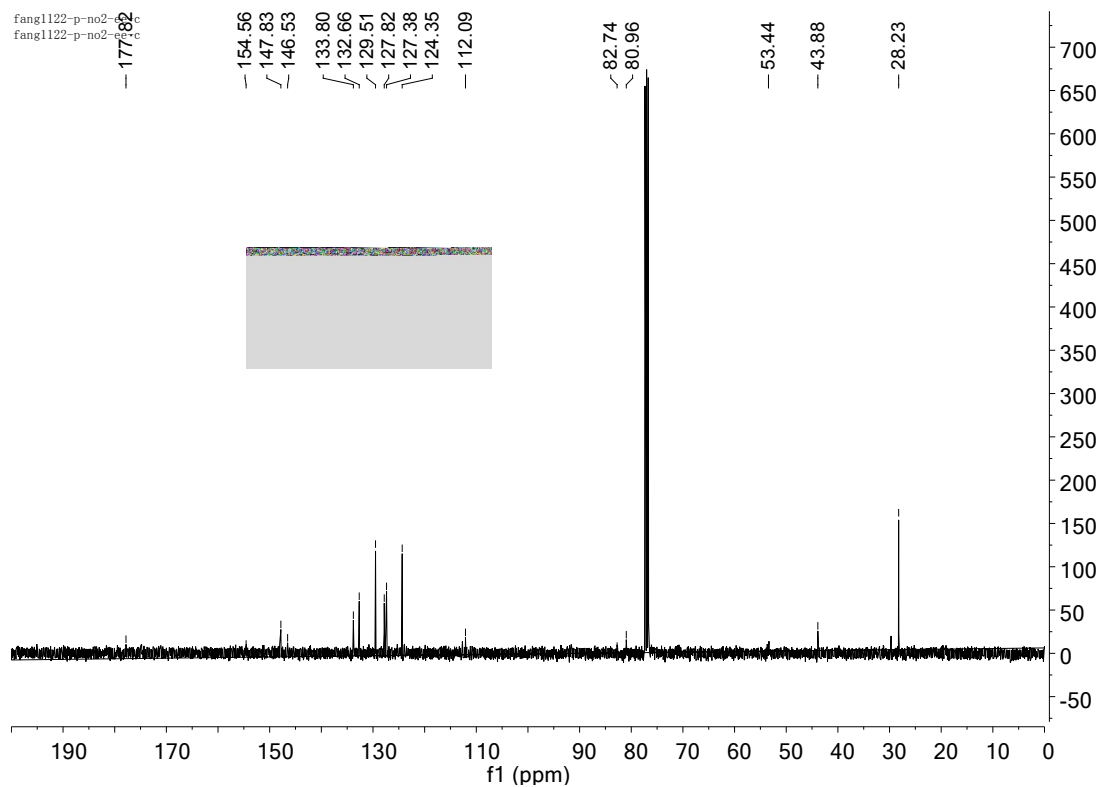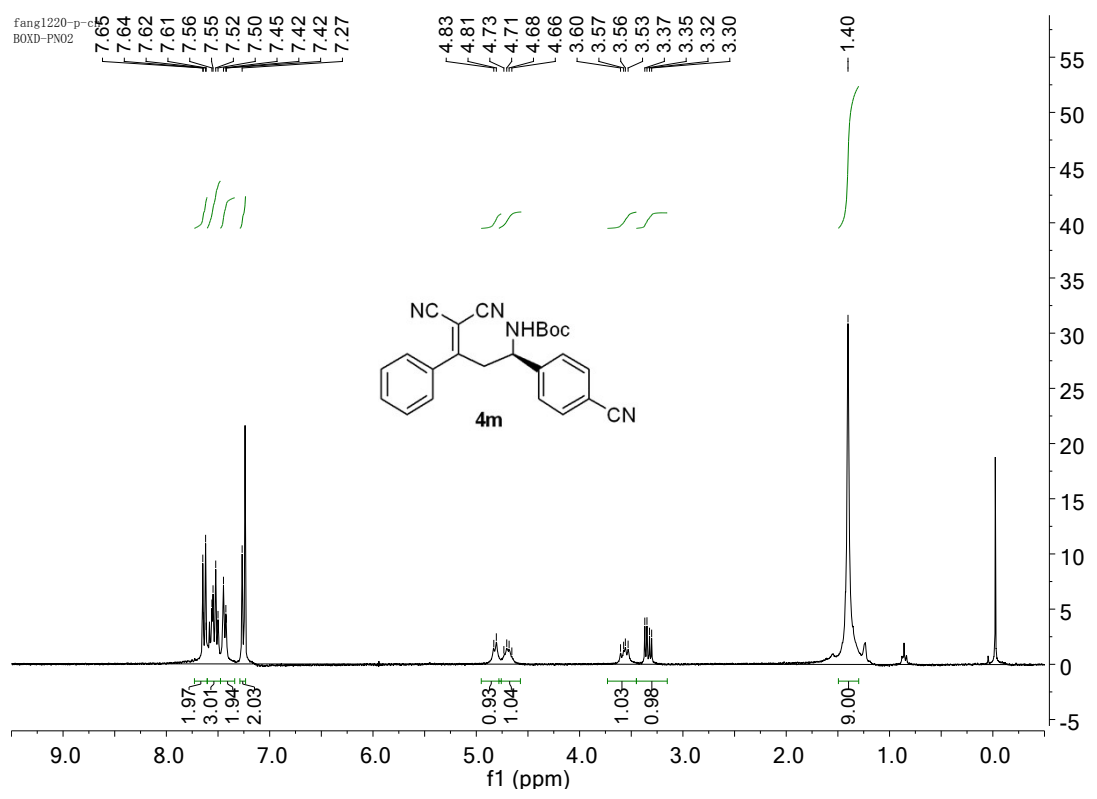

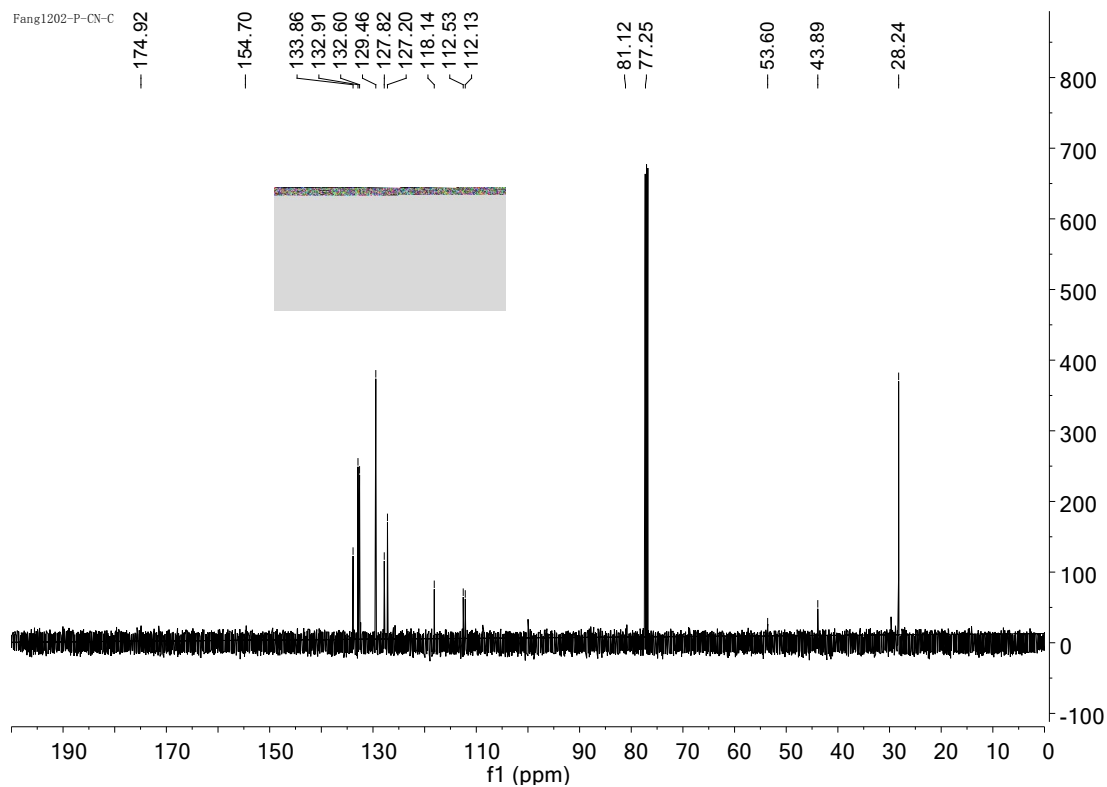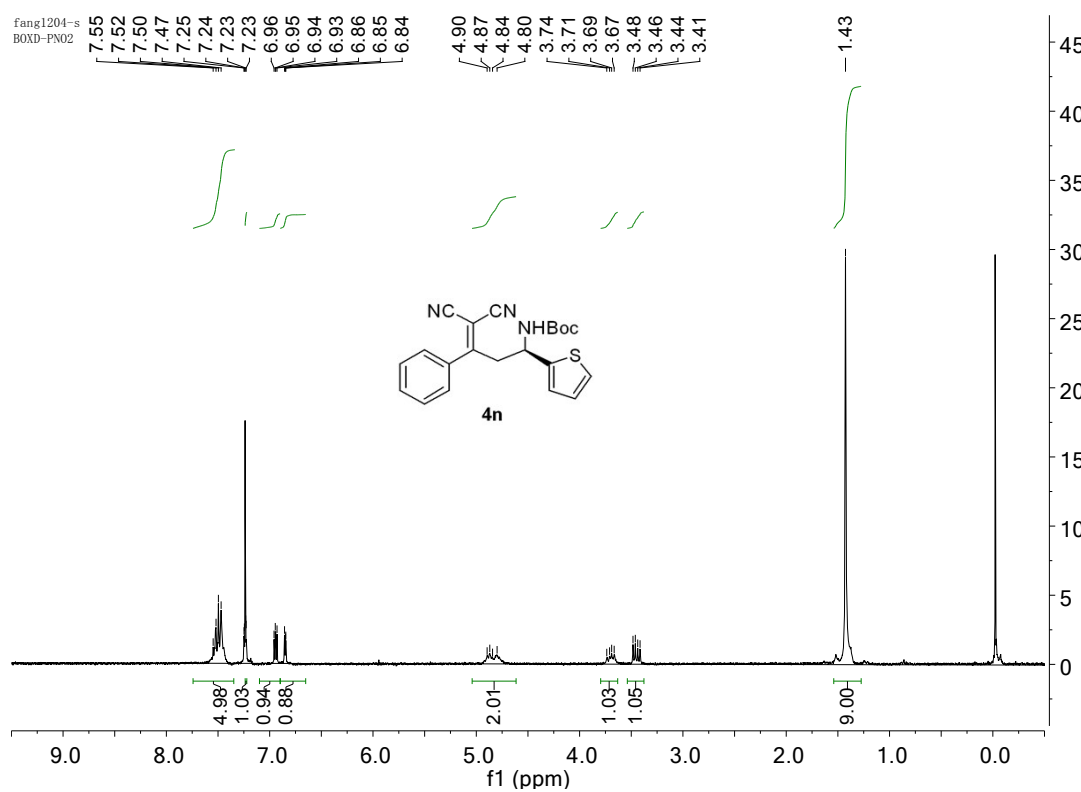

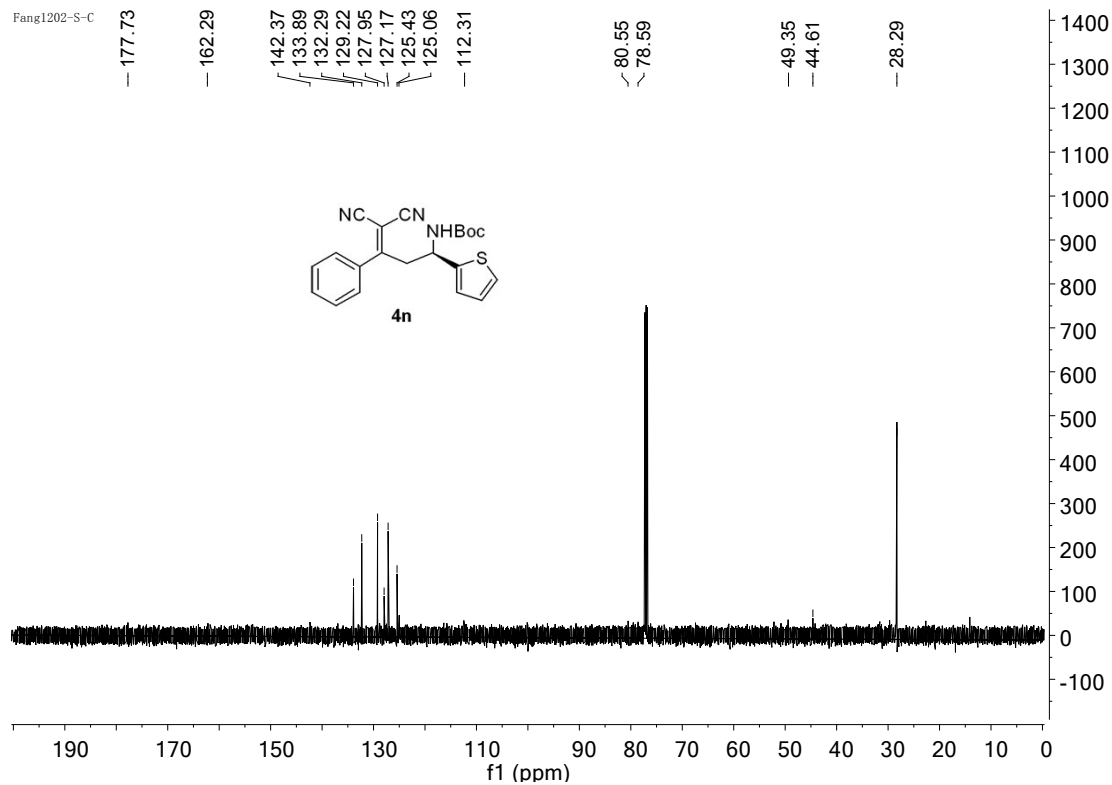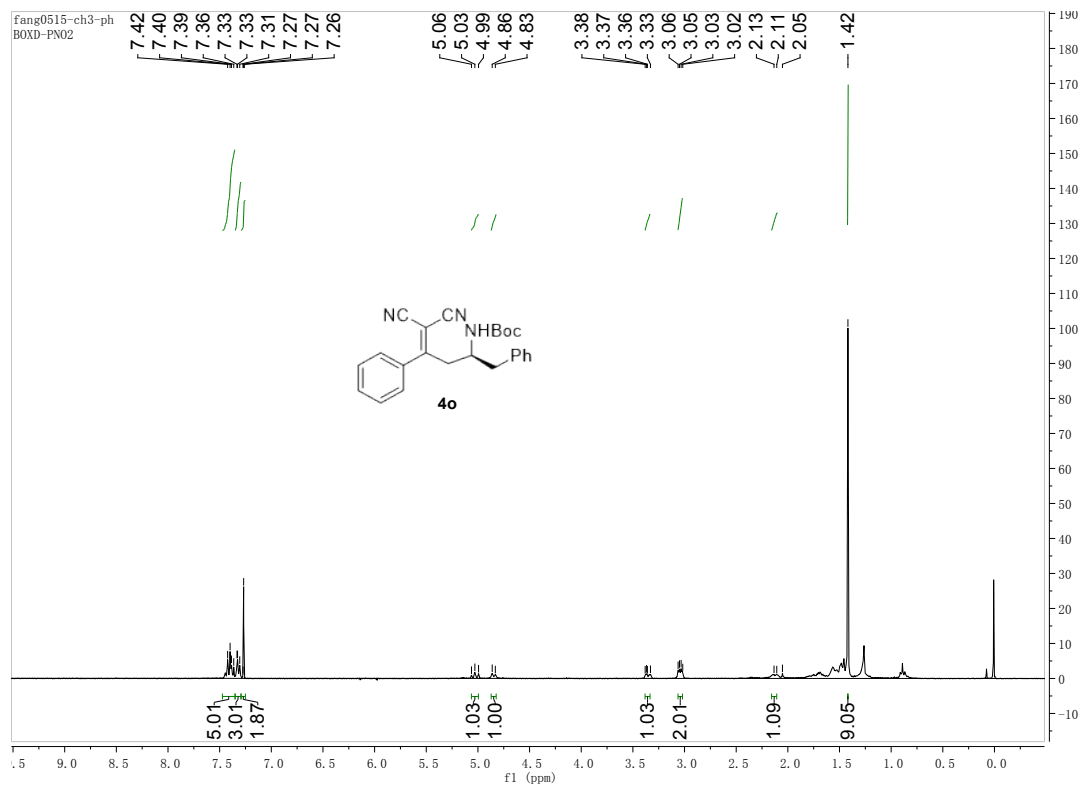



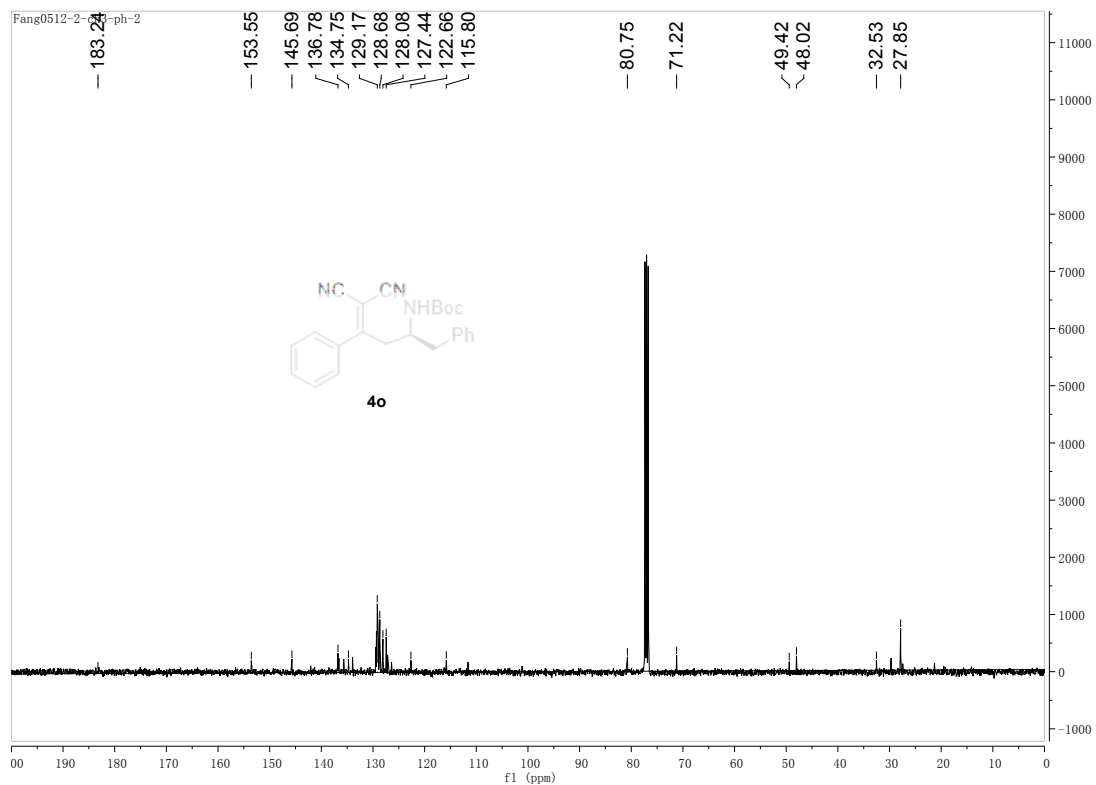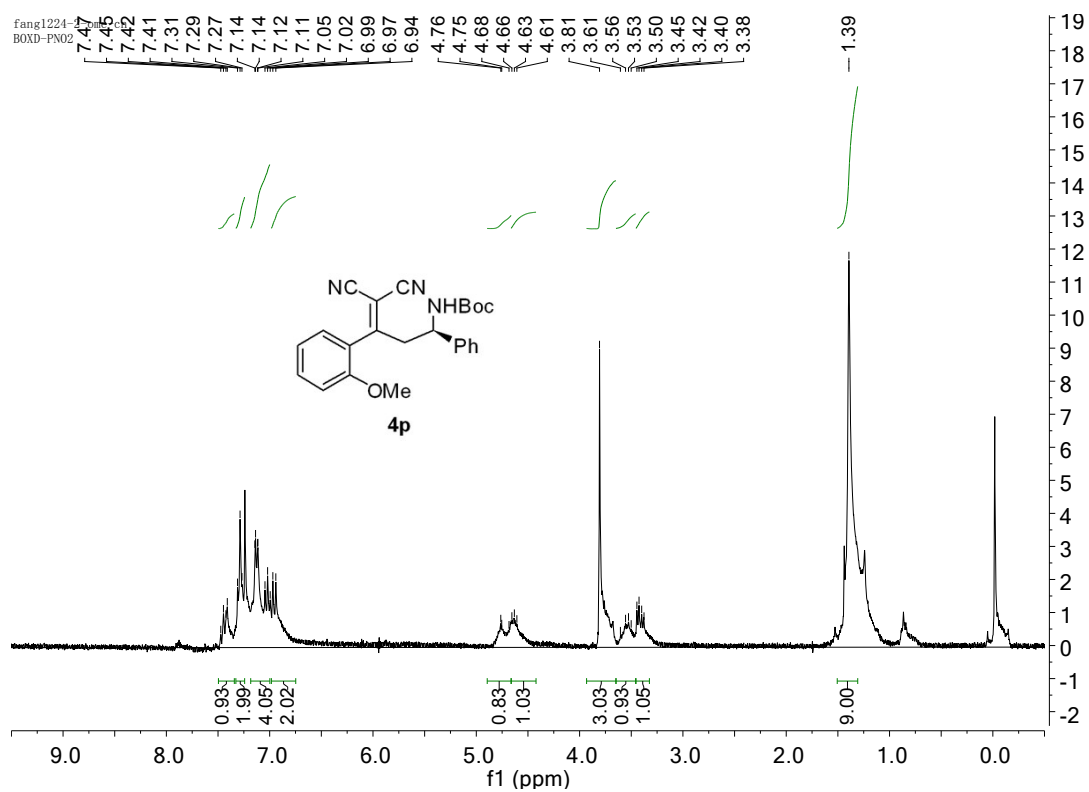

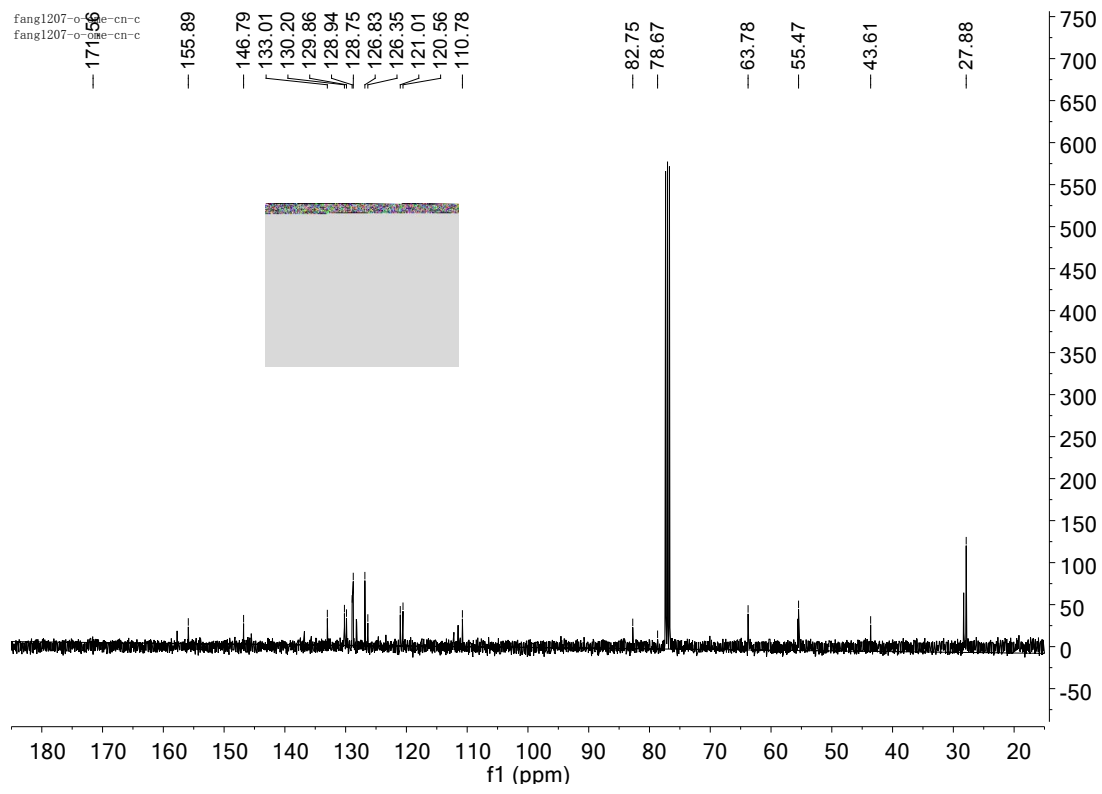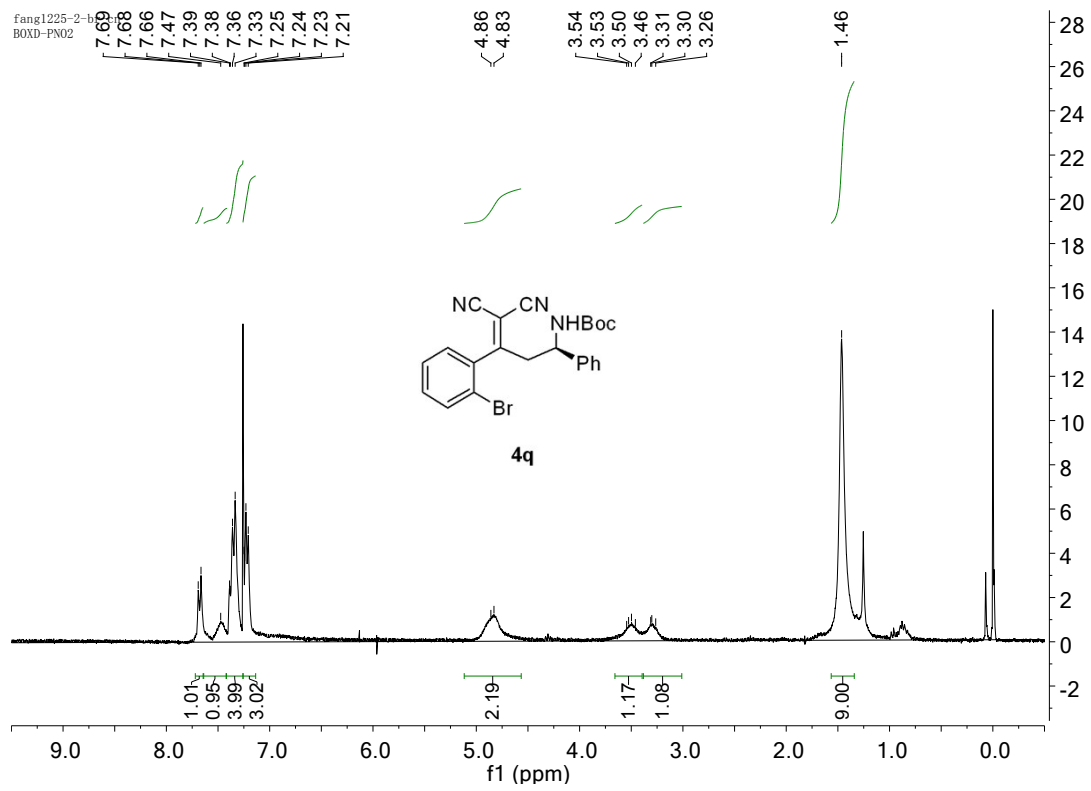

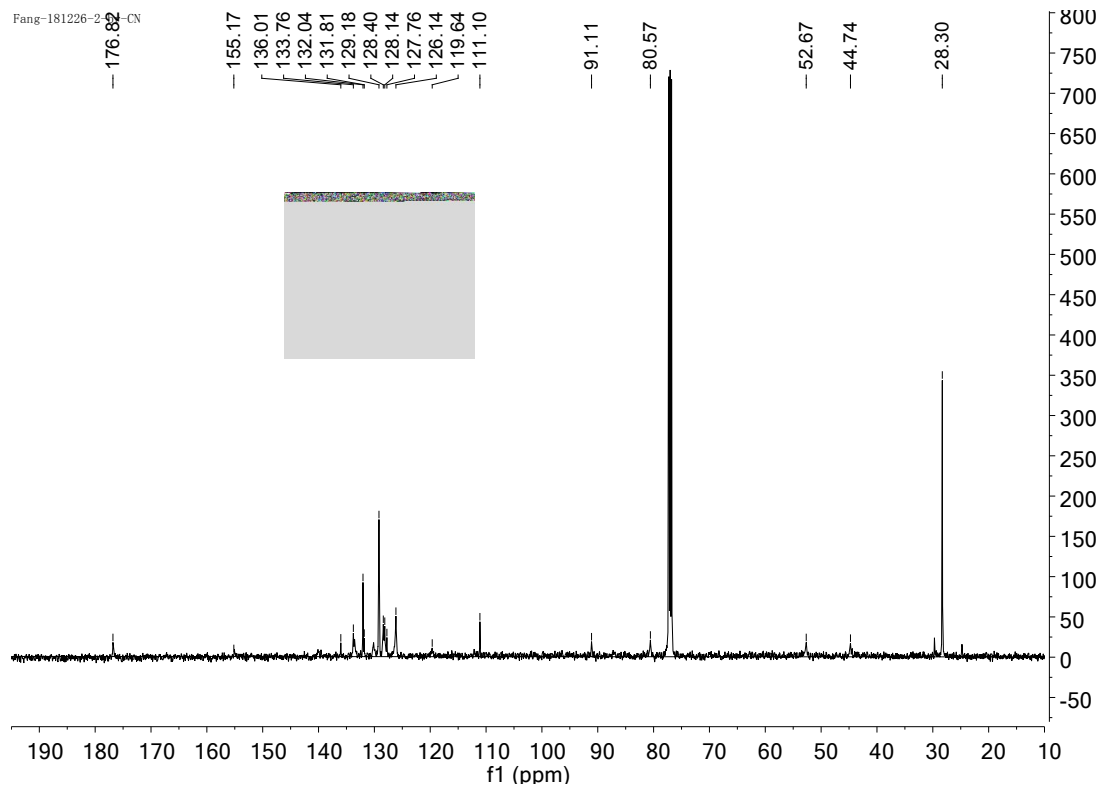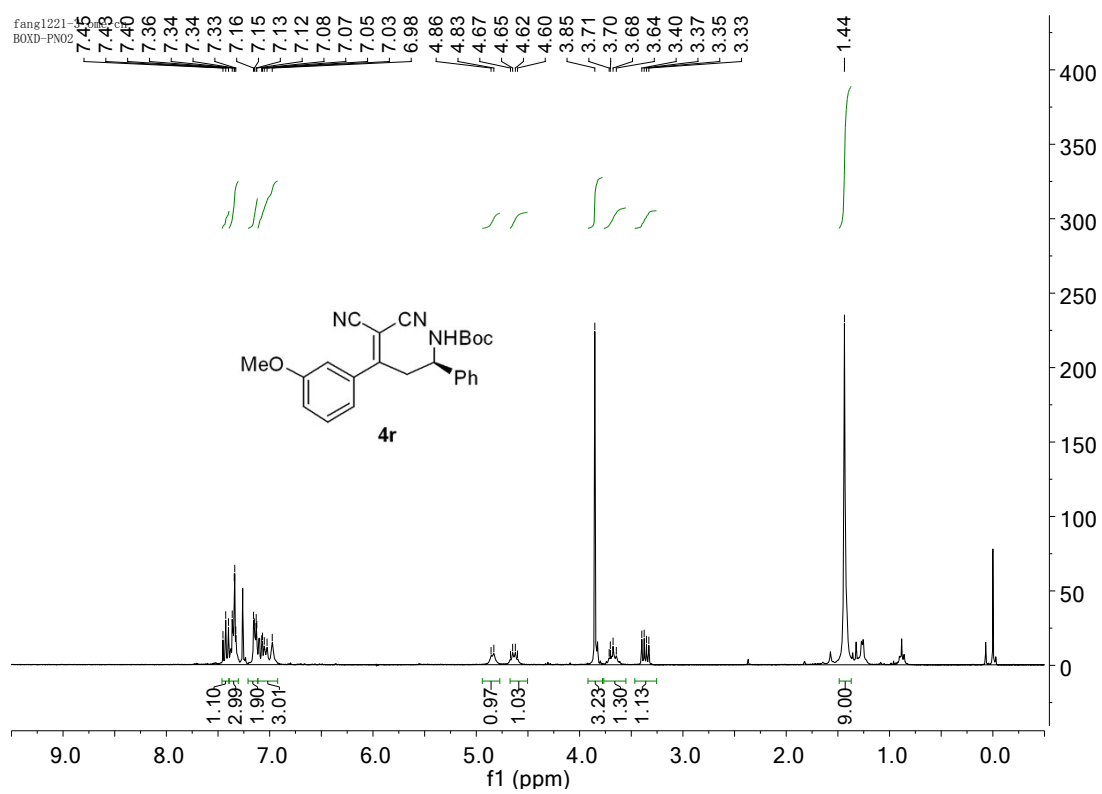

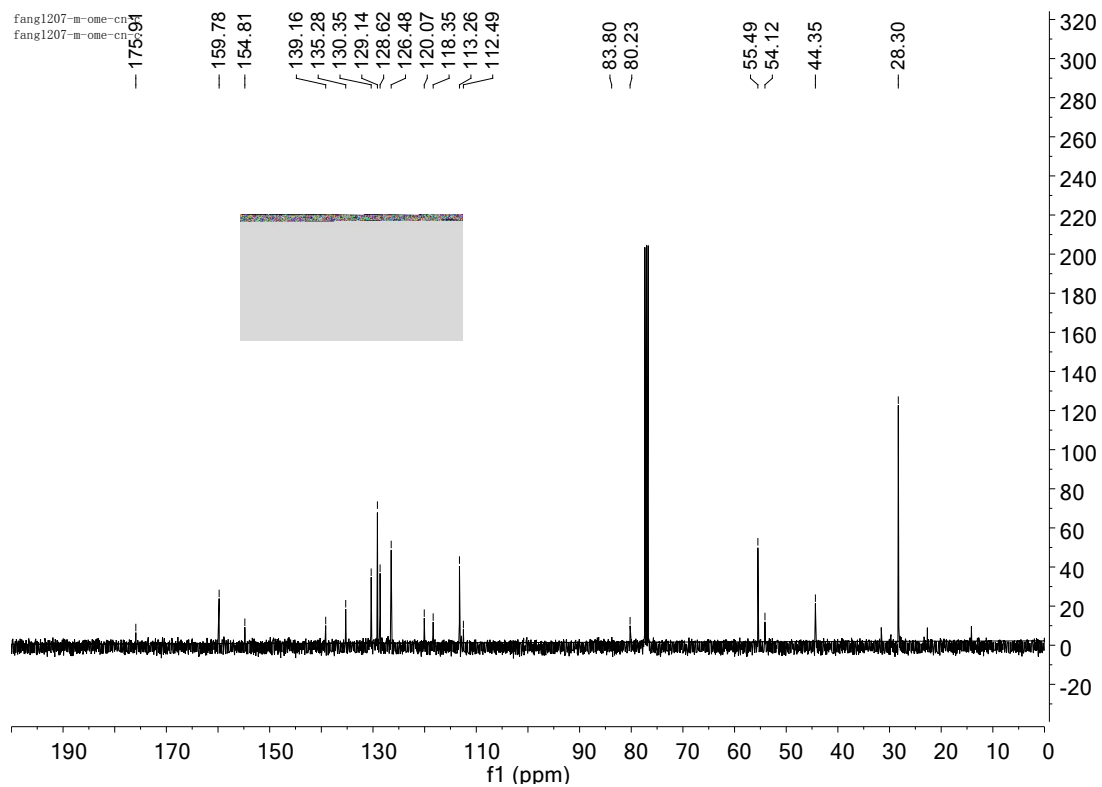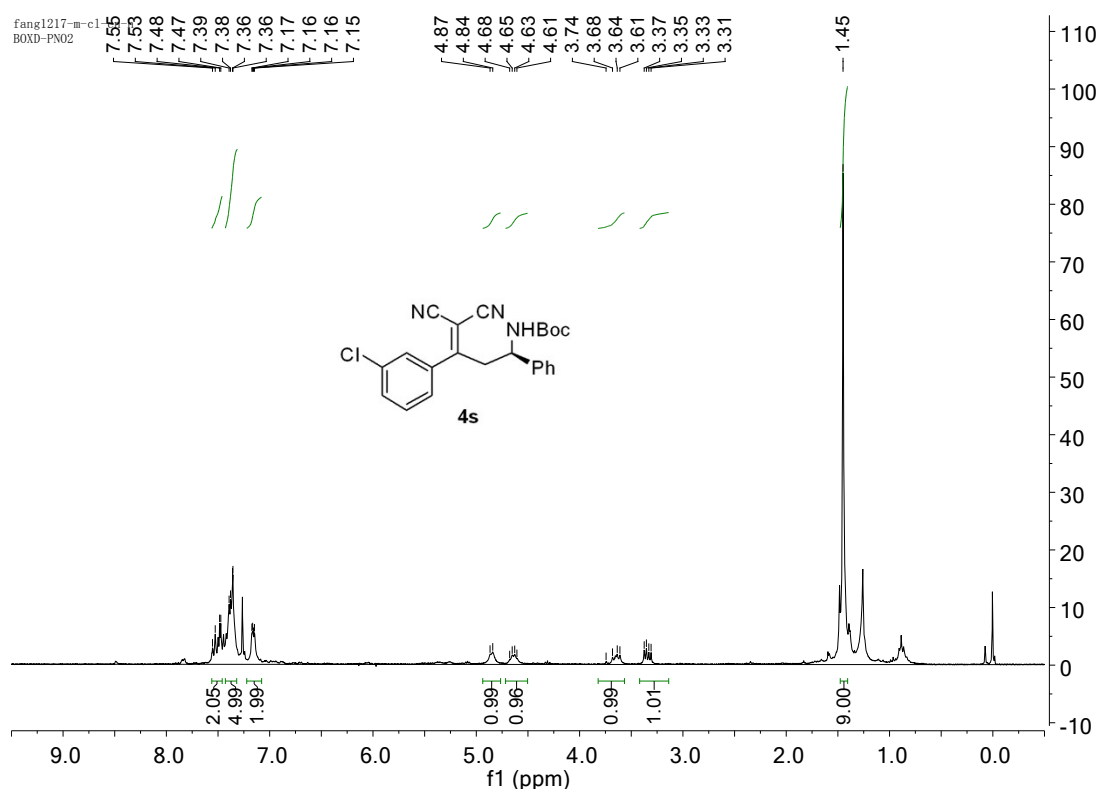

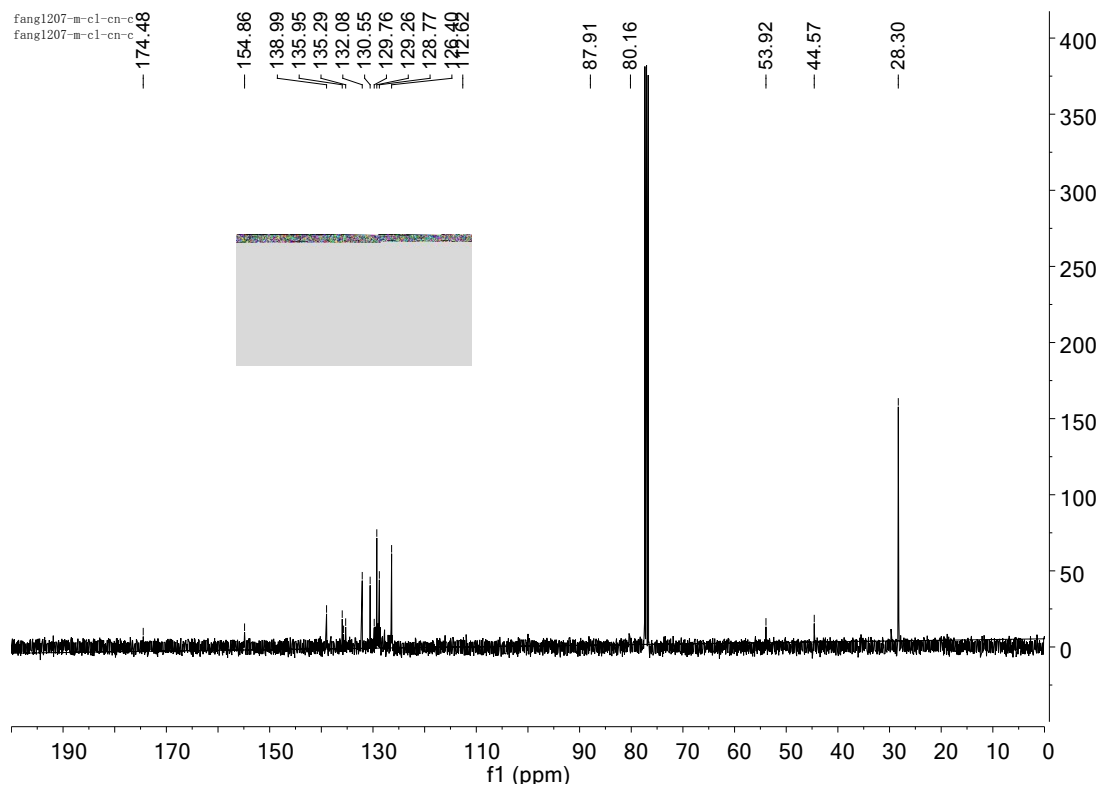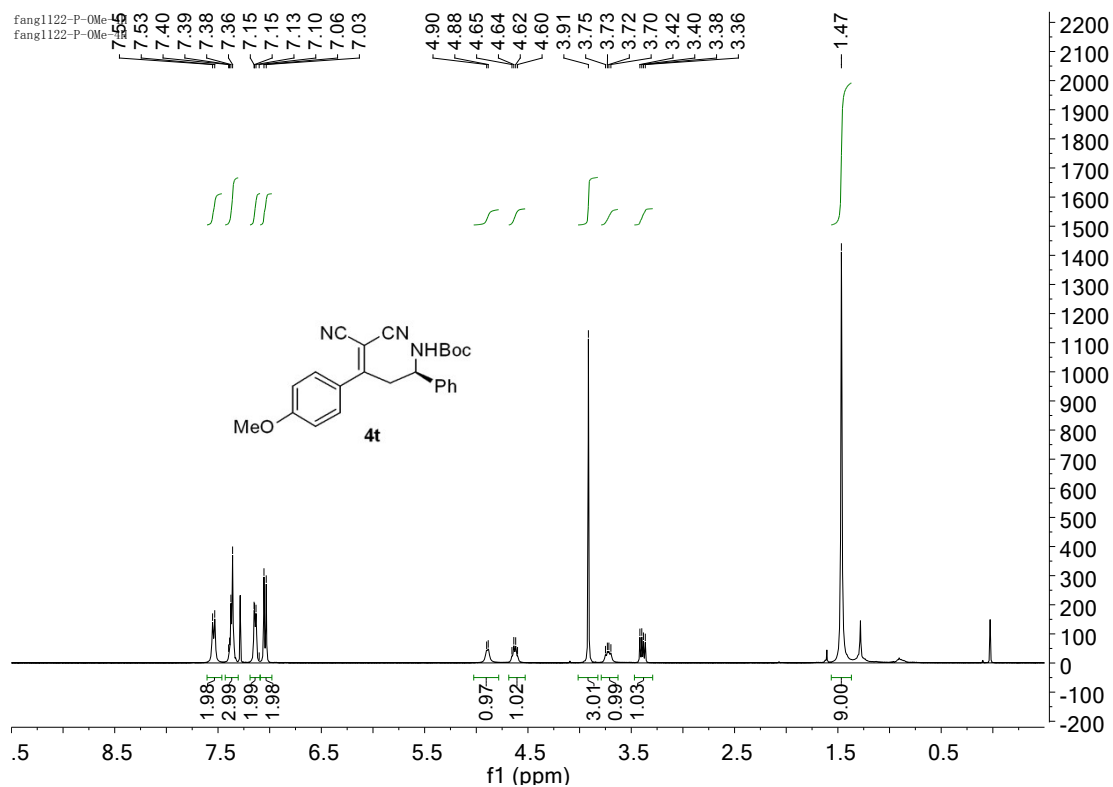

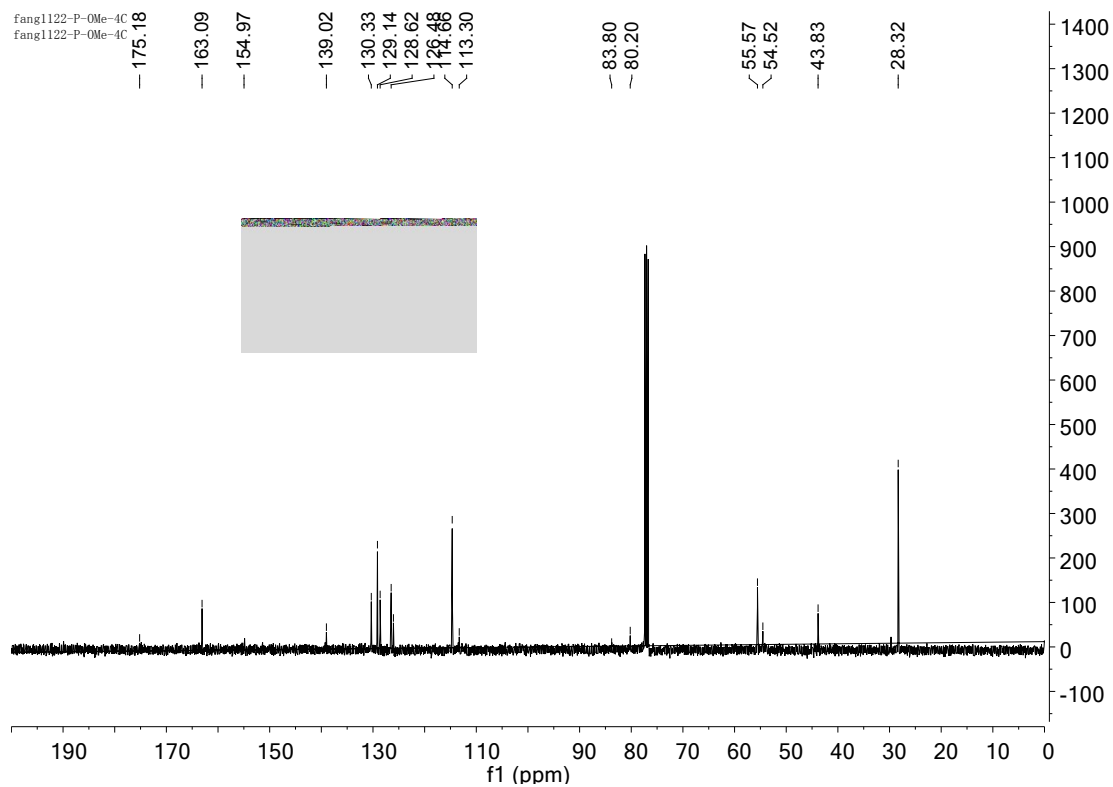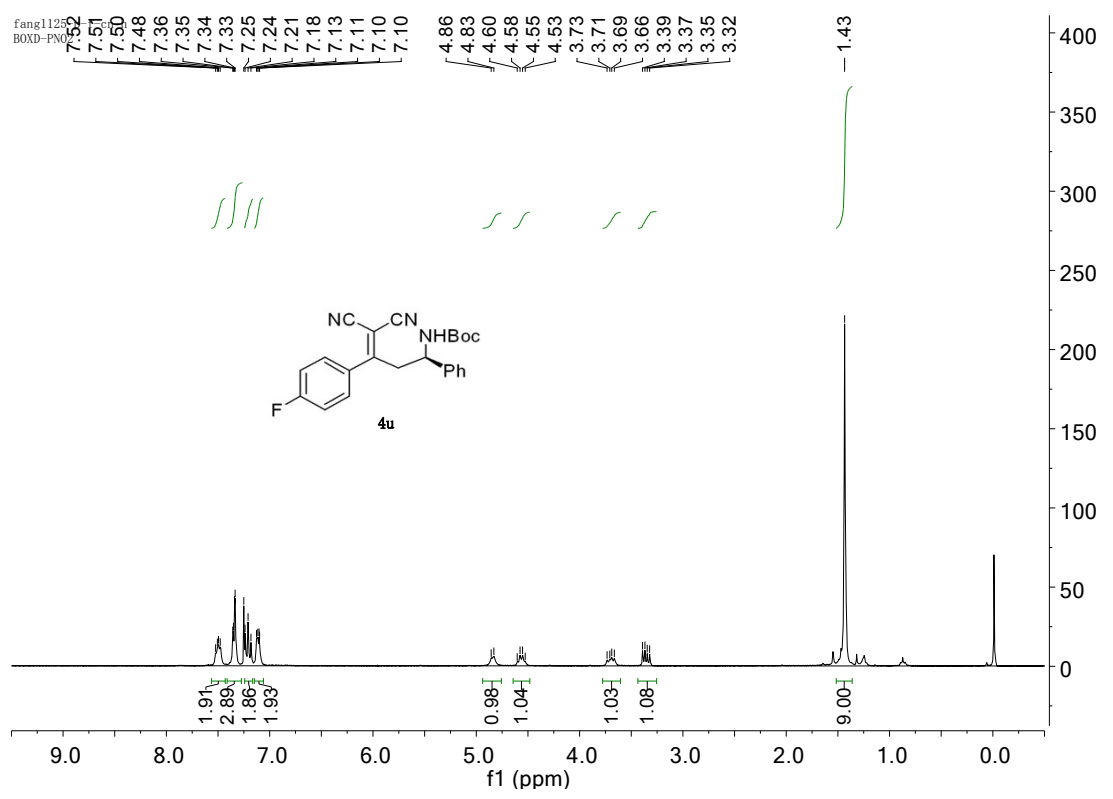

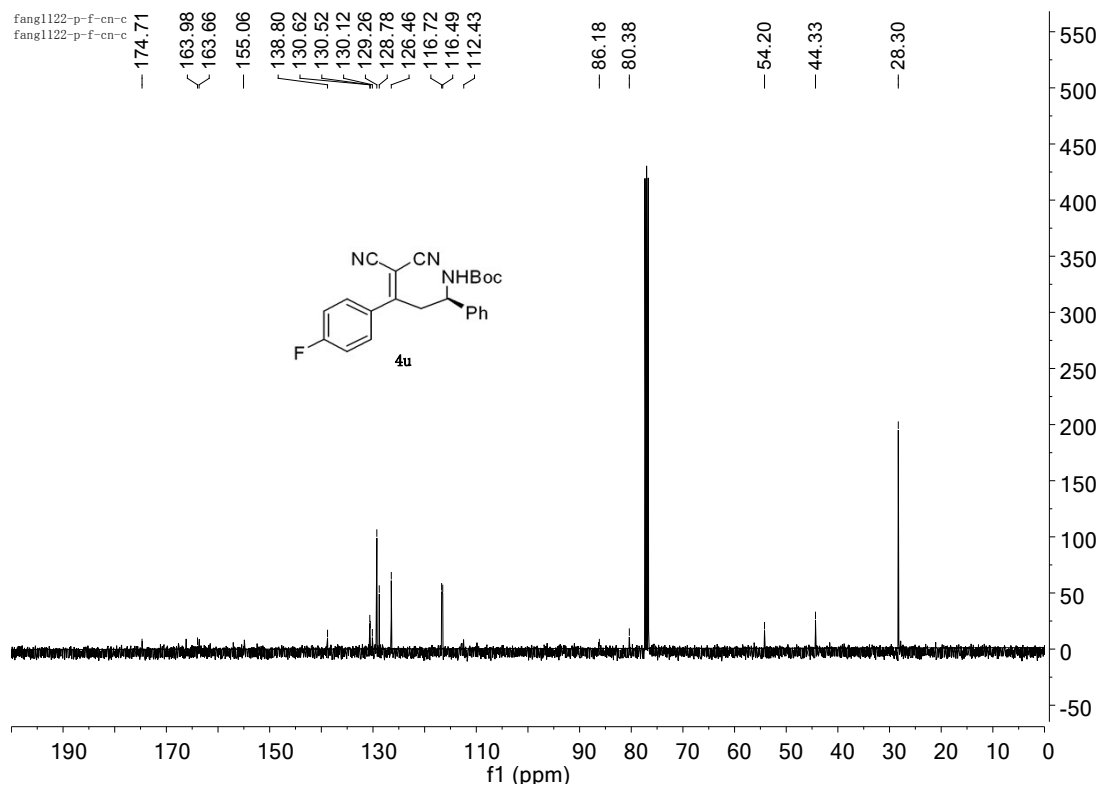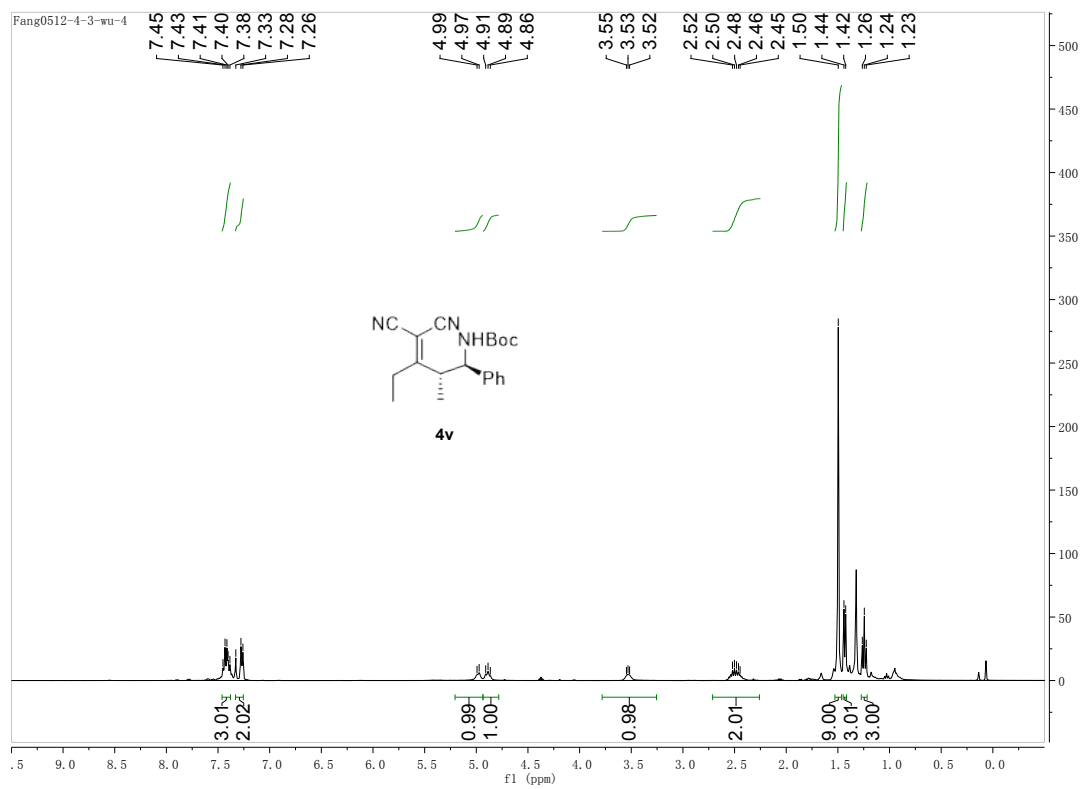

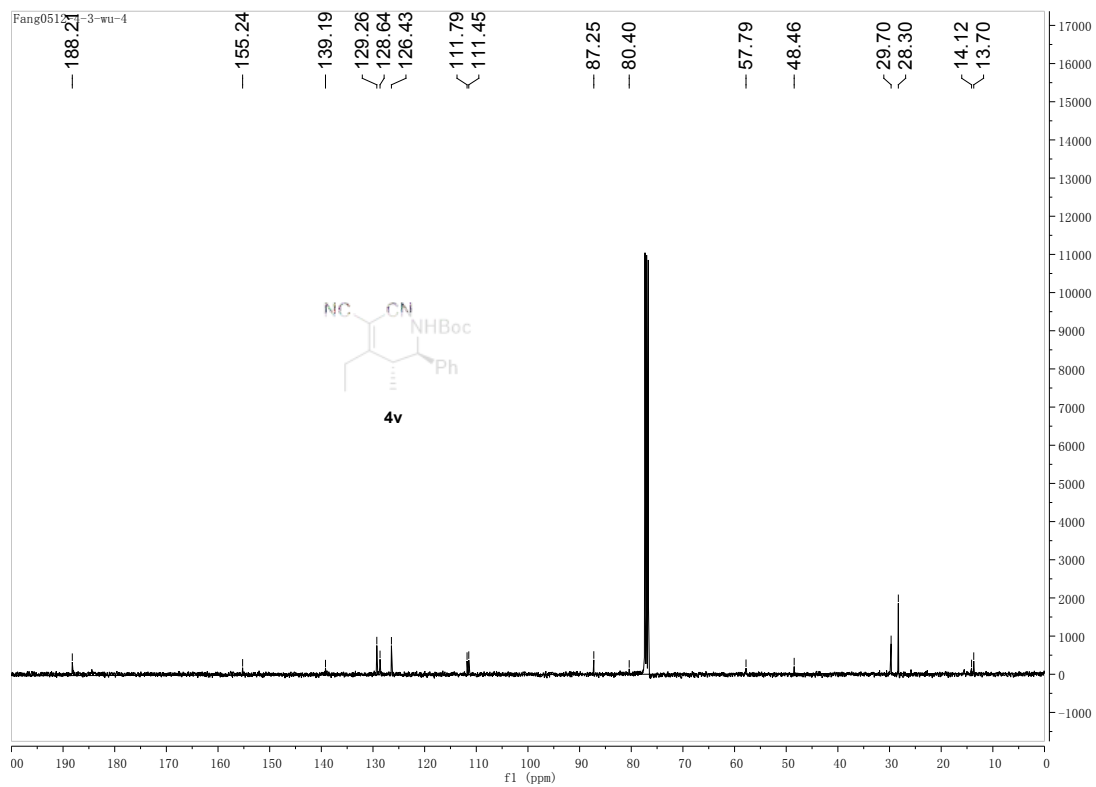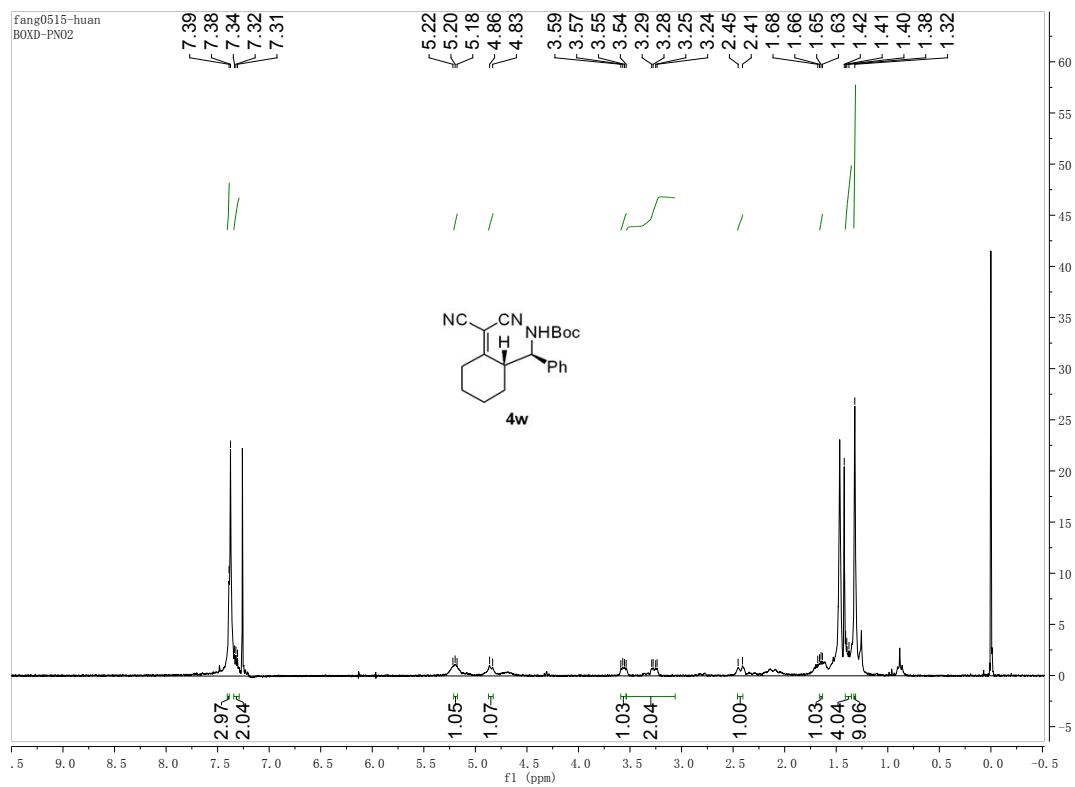



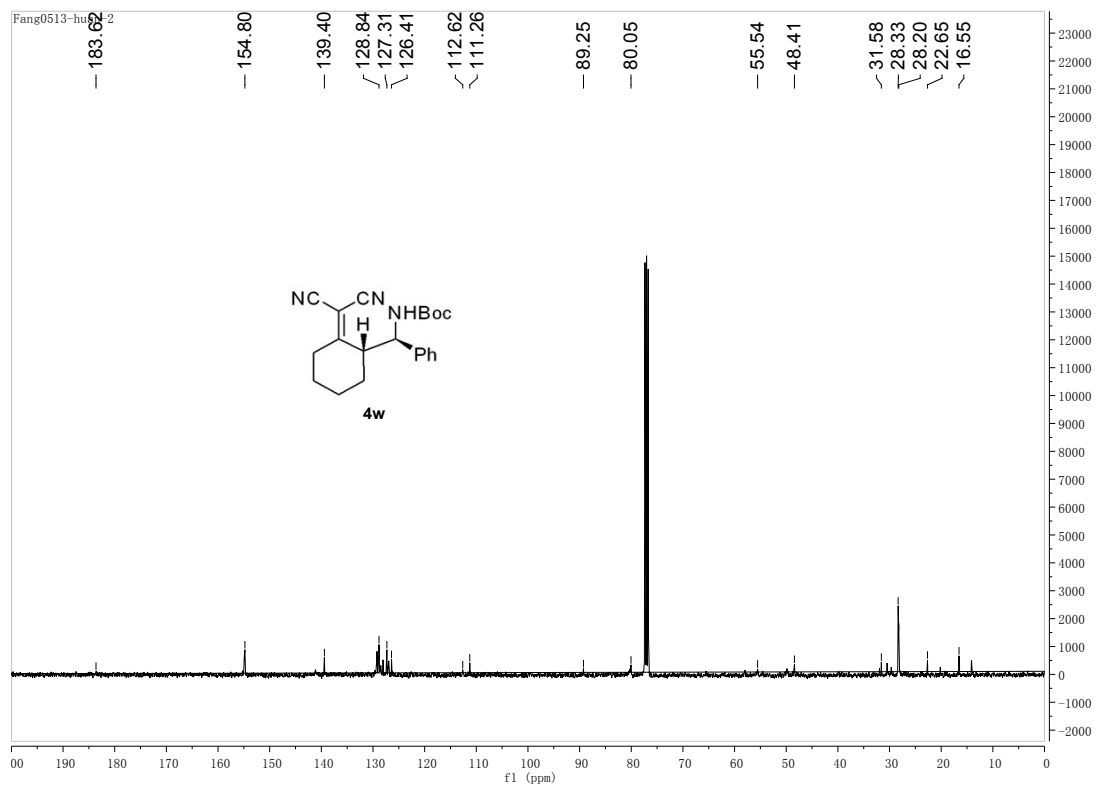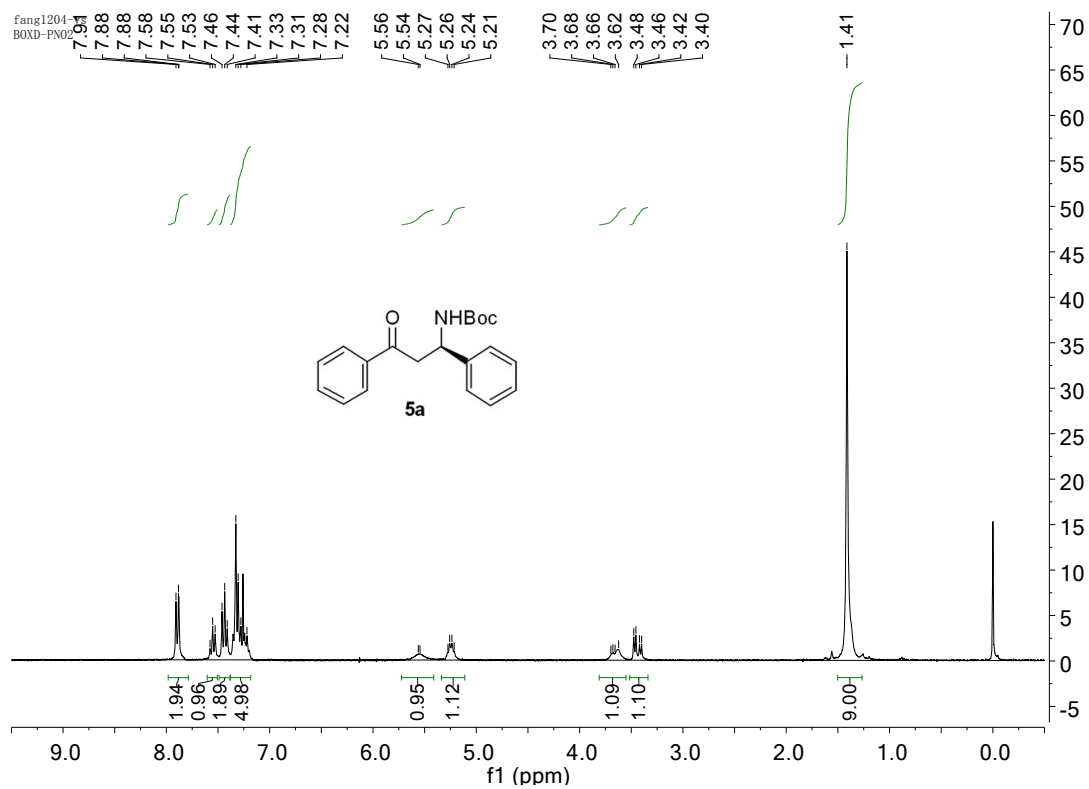

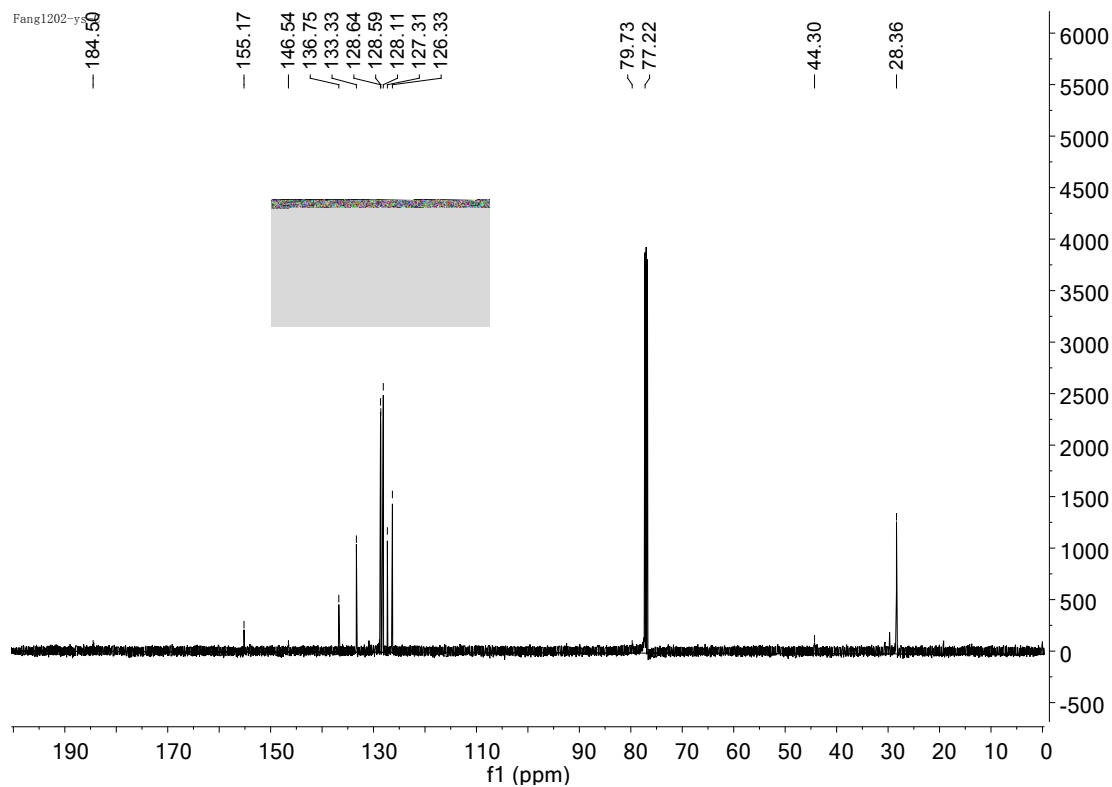

## 6. HPLC traces of all compounds 4a-4t and derivative 5a

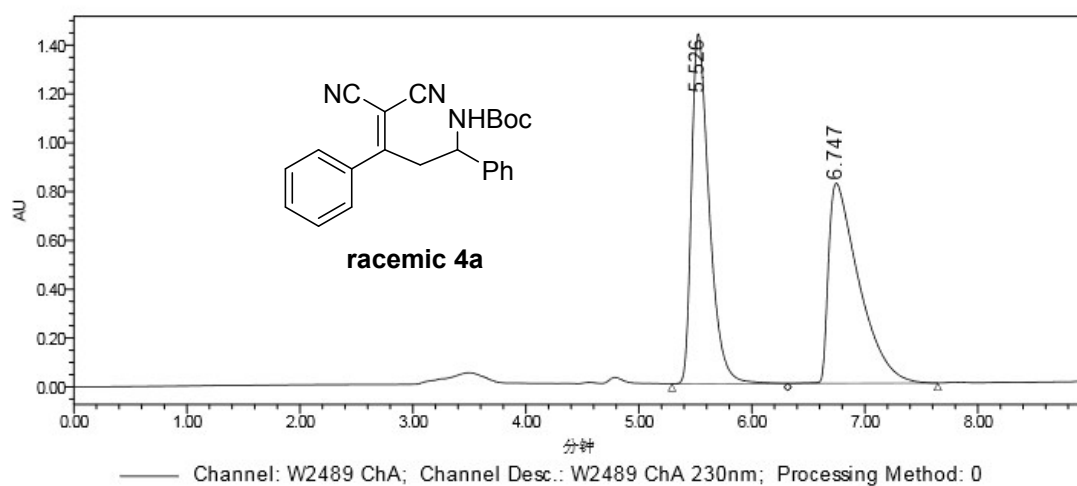

|   | Channel Description | RT (min) | Area (峰*sec) | % Area | Height (峰) |
|---|---------------------|----------|--------------|--------|------------|
| 1 | W2489 ChA 230nm     | 5.526    | 15621031     | 50.50  | 1432829    |
| 2 | W2489 ChA 230nm     | 6.747    | 15312509     | 49.50  | 819484     |

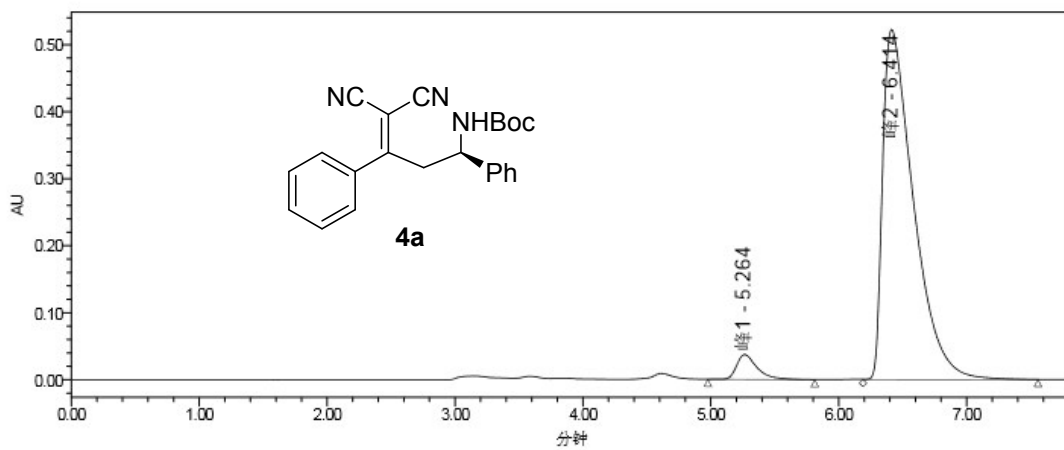

Channel: W2489 ChA; Channel Desc.: W2489 ChA 230nm; Processing Method: 0

|   | Channel Description | Peak Name | RT (min) | Area (峰*sec) | % Area | Height (峰) |
|---|---------------------|-----------|----------|--------------|--------|------------|
| 1 | W2489 ChA 230nm     | 峰1        | 5.264    | 406708       | 4.44   | 36906      |
| 2 | W2489 ChA 230nm     | 峰2        | 6.414    | 8747568      | 95.56  | 522093     |

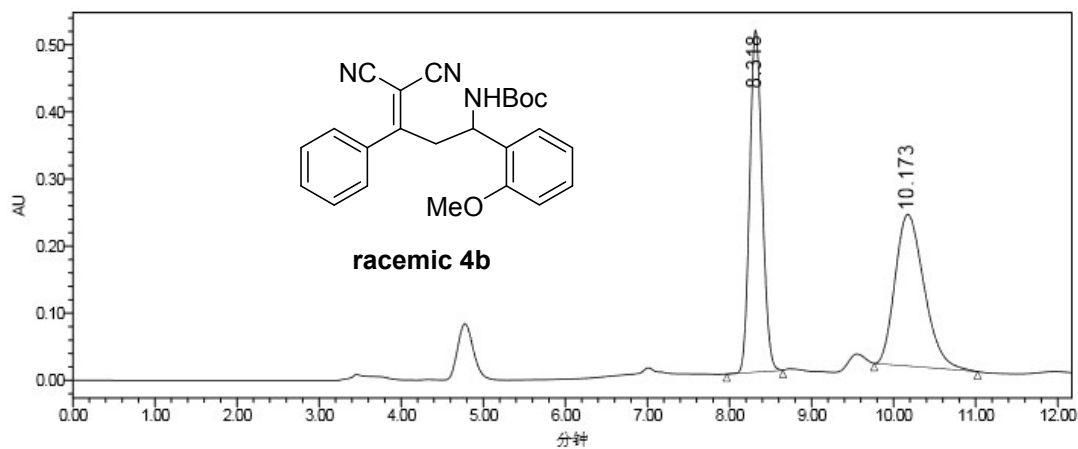

Channel: W2489 ChA; Channel Desc.: W2489 ChA 230nm; Processing Method: 0

|   | Channel Description | RT (min) | Area (峰*sec) | % Area | Height (峰) |
|---|---------------------|----------|--------------|--------|------------|
| 1 | W2489 ChA 230nm     | 8.318    | 5376731      | 49.14  | 509657     |
| 2 | W2489 ChA 230nm     | 10.173   | 5564872      | 50.86  | 225966     |

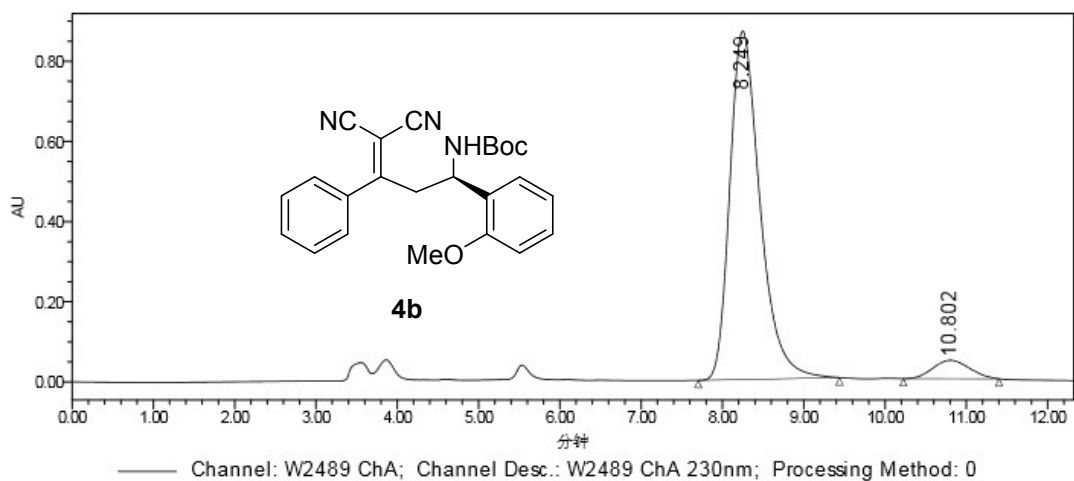

|   | Channel Description | RT (min) | Area (峰*sec) | % Area | Height (峰) |
|---|---------------------|----------|--------------|--------|------------|
| 1 | W2489 ChA 230nm     | 8.249    | 22424838     | 93.99  | 869221     |
| 2 | W2489 ChA 230nm     | 10.802   | 1432841      | 6.01   | 45841      |

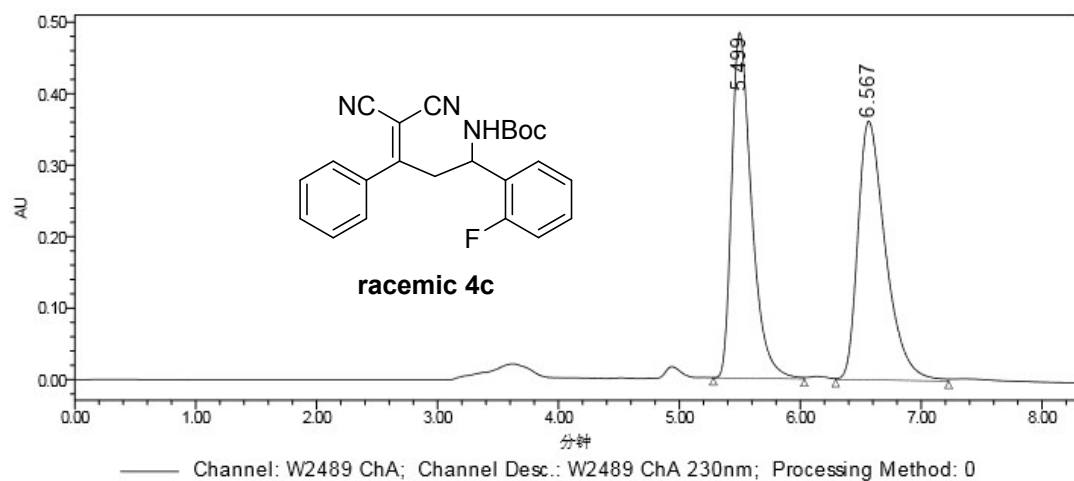

|   | Channel Description | RT (min) | Area (峰*sec) | % Area | Height (峰) |
|---|---------------------|----------|--------------|--------|------------|
| 1 | W2489 ChA 230nm     | 5.499    | 5541822      | 49.05  | 483303     |
| 2 | W2489 ChA 230nm     | 6.567    | 5756794      | 50.95  | 361808     |

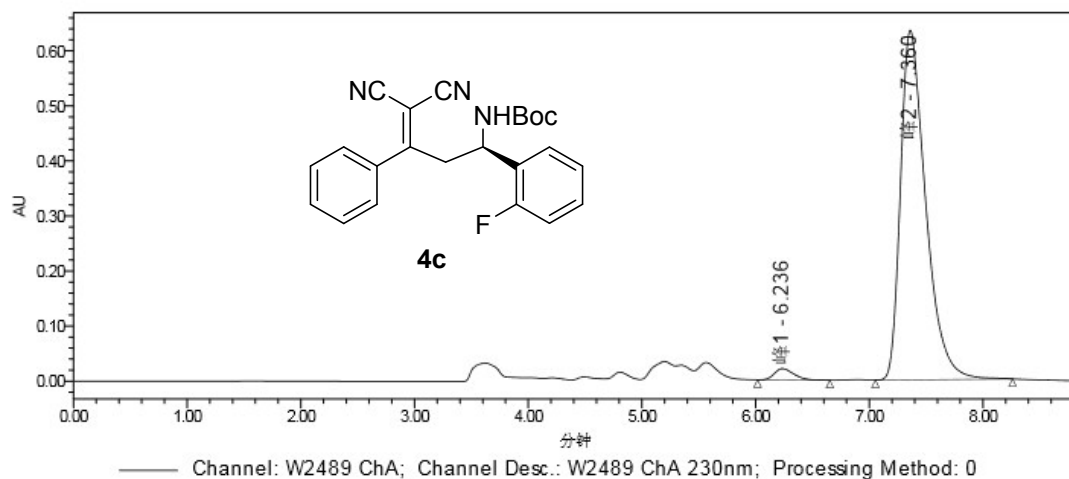

|   | Channel Description | Peak Name | RT (min) | Area (峰*sec) | % Area | Height (峰) |
|---|---------------------|-----------|----------|--------------|--------|------------|
| 1 | W2489 ChA 230nm     | 峰1        | 6.236    | 244260       | 2.44   | 20565      |
| 2 | W2489 ChA 230nm     | 峰2        | 7.360    | 9753718      | 97.56  | 634779     |

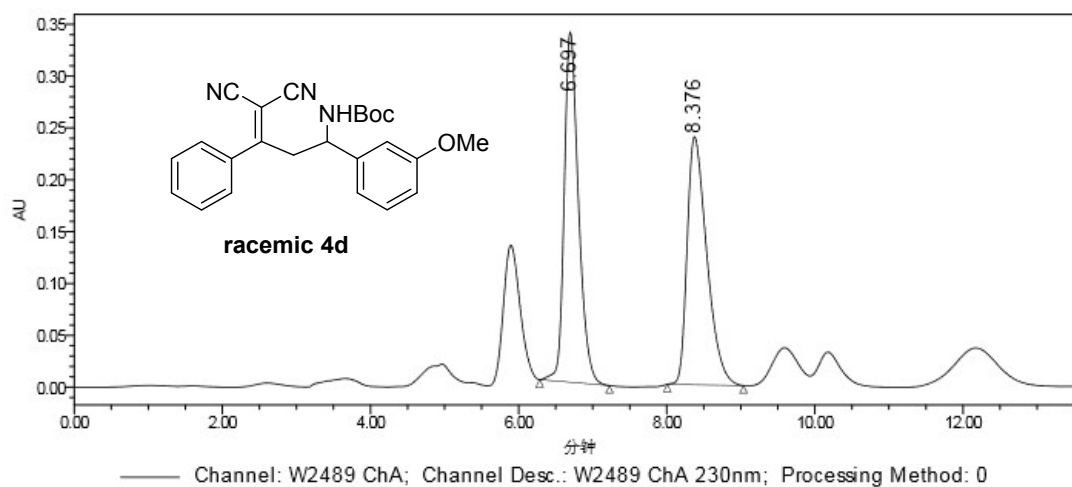

|   | Channel Description | RT (min) | Area (峰*sec) | % Area | Height (峰) |
|---|---------------------|----------|--------------|--------|------------|
| 1 | W2489 ChA 230nm     | 6.697    | 4508939      | 50.50  | 337567     |
| 2 | W2489 ChA 230nm     | 8.376    | 4419809      | 49.50  | 239033     |

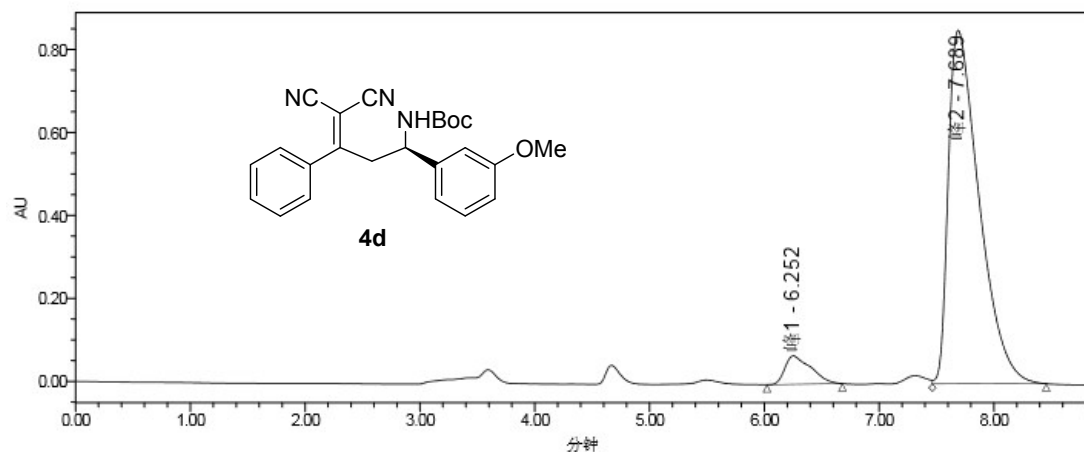

Channel: W2489 ChA; Channel Desc.: W2489 ChA 230nm; Processing Method: 0

|   | Channel Description | Peak Name | RT (min) | Area (峰*sec) | % Area | Height (峰) |
|---|---------------------|-----------|----------|--------------|--------|------------|
| 1 | W2489 ChA 230nm     | 峰1        | 6.252    | 1074575      | 6.32   | 68377      |
| 2 | W2489 ChA 230nm     | 峰2        | 7.689    | 15922986     | 93.68  | 851939     |

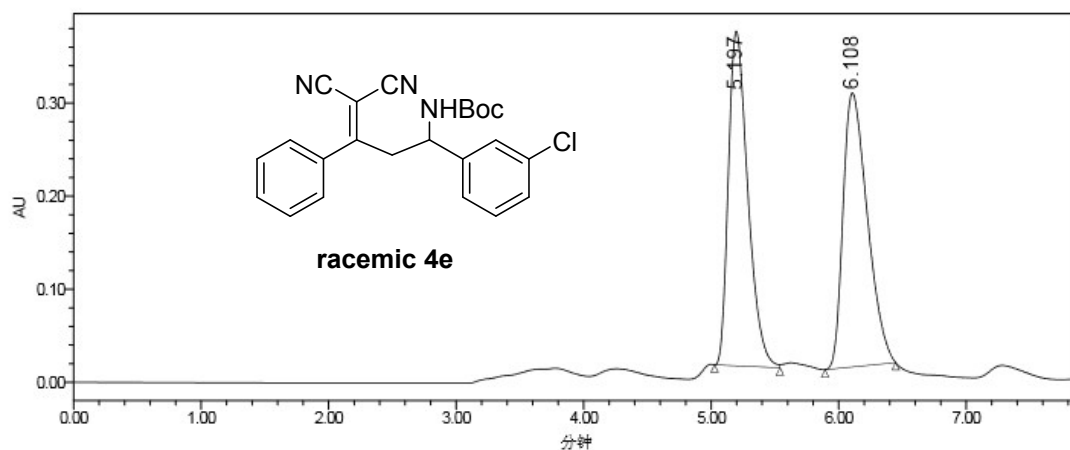

Channel: W2489 ChA; Channel Desc.: W2489 ChA 230nm; Processing Method: 0

|   | Channel Description | RT (min) | Area (峰*sec) | % Area | Height (峰) |
|---|---------------------|----------|--------------|--------|------------|
| 1 | W2489 ChA 230nm     | 5.197    | 3806297      | 49.38  | 359396     |
| 2 | W2489 ChA 230nm     | 6.108    | 3901400      | 50.62  | 294223     |

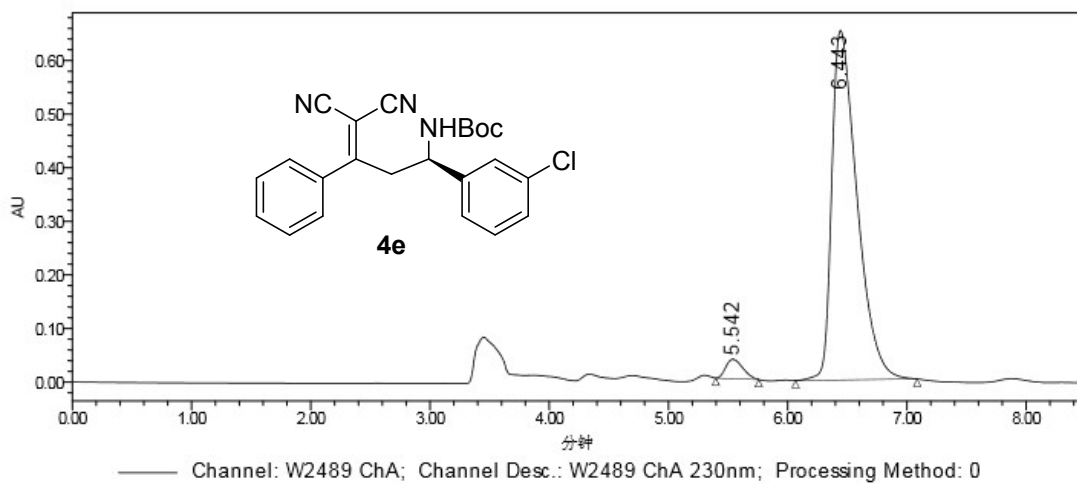

|   | Channel Description | RT (min) | Area (峰*sec) | % Area | Height (峰) |
|---|---------------------|----------|--------------|--------|------------|
| 1 | W2489 ChA 230nm     | 5.542    | 357365       | 3.59   | 36161      |
| 2 | W2489 ChA 230nm     | 6.443    | 9600649      | 96.41  | 651842     |

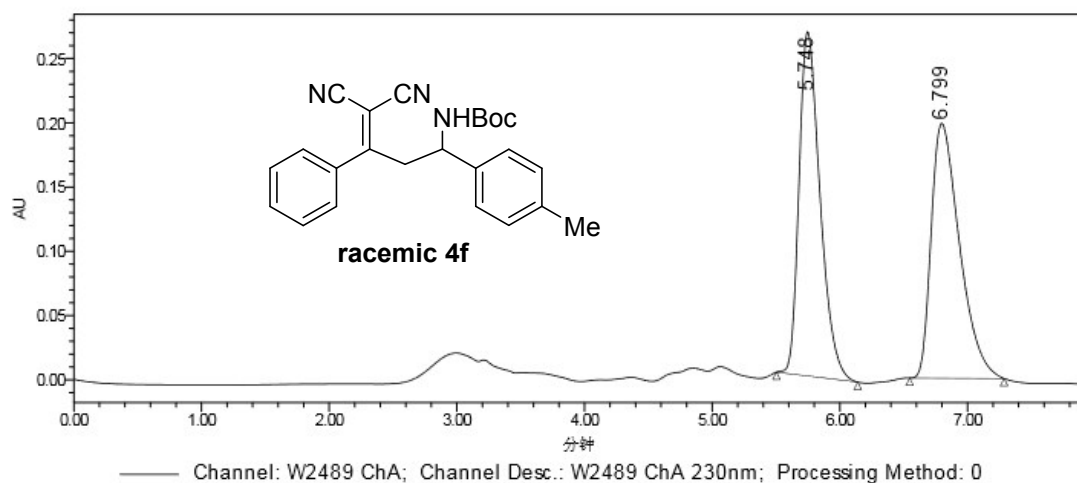

|   | Channel Description | RT (min) | Area (峰*sec) | % Area | Height (峰) |
|---|---------------------|----------|--------------|--------|------------|
| 1 | W2489 ChA 230nm     | 5.748    | 3065494      | 50.04  | 267677     |
| 2 | W2489 ChA 230nm     | 6.799    | 3060306      | 49.96  | 198189     |

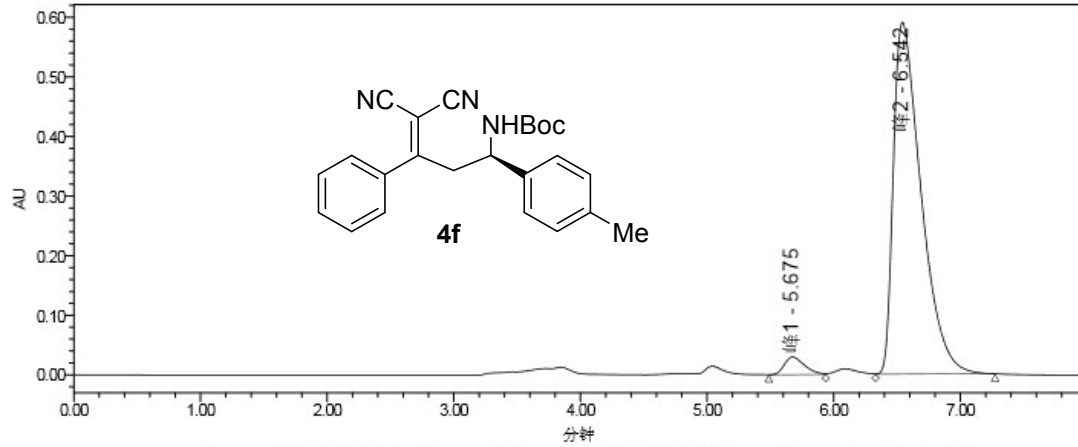

Channel: W2489 ChA; Channel Desc.: W2489 ChA 230nm; Processing Method: 0

|   | Channel Description | Peak Name | RT (min) | Area (礦*sec) | % Area | Height (礦) |
|---|---------------------|-----------|----------|--------------|--------|------------|
| 1 | W2489 ChA 230nm     | 峰1        | 5.675    | 325879       | 3.50   | 29556      |
| 2 | W2489 ChA 230nm     | 峰2        | 6.542    | 8973194      | 96.50  | 590411     |

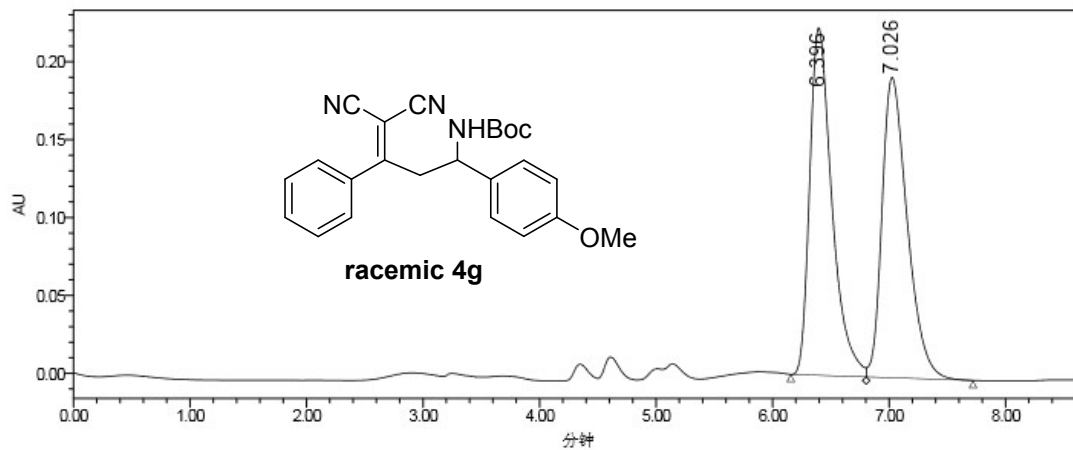

Channel: W2489 ChA; Channel Desc.: W2489 ChA 230nm; Processing Method: 0

|   | Channel Description | RT (min) | Area (礦*sec) | % Area | Height (礦) |
|---|---------------------|----------|--------------|--------|------------|
| 1 | W2489 ChA 230nm     | 6.396    | 2957632      | 50.47  | 222868     |
| 2 | W2489 ChA 230nm     | 7.026    | 2902422      | 49.53  | 192630     |



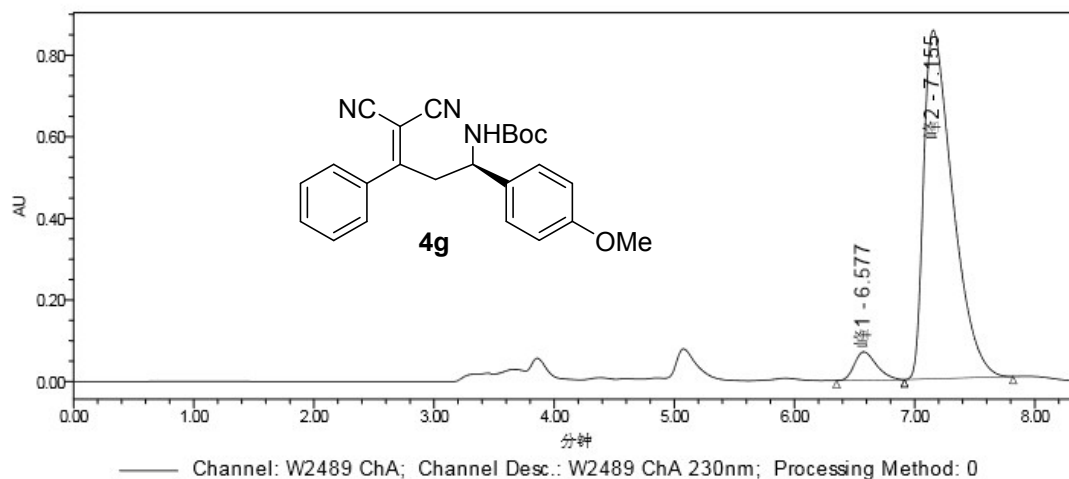

|   | Channel Description | Peak Name | RT (min) | Area (AU*sec) | % Area | Height (AU) |
|---|---------------------|-----------|----------|---------------|--------|-------------|
| 1 | W2489 ChA 230nm     | 峰1        | 6.577    | 886482        | 5.82   | 69329       |
| 2 | W2489 ChA 230nm     | 峰2        | 7.155    | 14345980      | 94.18  | 854693      |

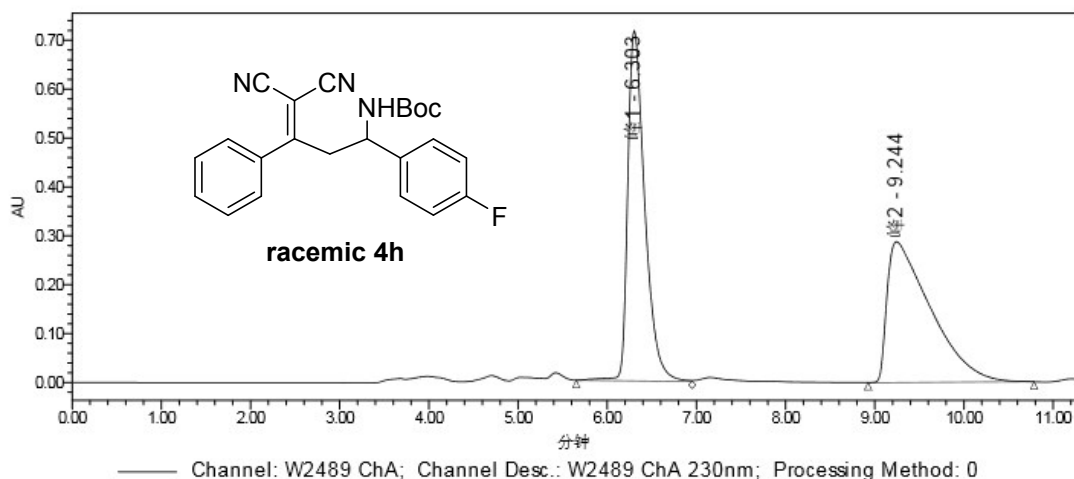

|   | Channel Description | Peak Name | RT (min) | Area (AU*sec) | % Area | Height (AU) |
|---|---------------------|-----------|----------|---------------|--------|-------------|
| 1 | W2489 ChA 230nm     | 峰1        | 6.303    | 9473002       | 49.29  | 715829      |
| 2 | W2489 ChA 230nm     | 峰2        | 9.244    | 9743971       | 50.71  | 287685      |

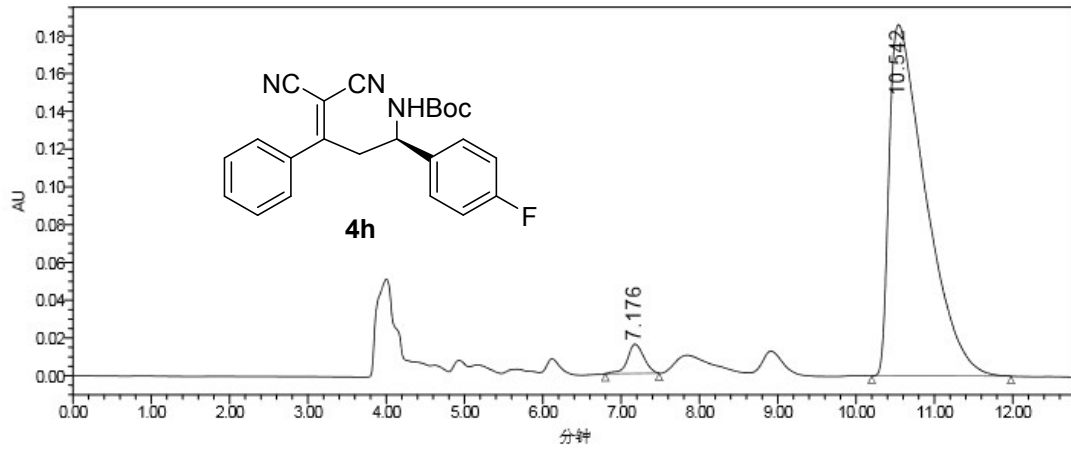

Channel: W2489 ChA; Channel Desc.: W2489 ChA 230nm; Processing Method: 0

|   | Channel Description | RT (min) | Area (礦*sec) | % Area | Height (礦) |
|---|---------------------|----------|--------------|--------|------------|
| 1 | W2489 ChA 230nm     | 7.176    | 225028       | 3.60   | 15463      |
| 2 | W2489 ChA 230nm     | 10.542   | 6023730      | 96.40  | 185951     |

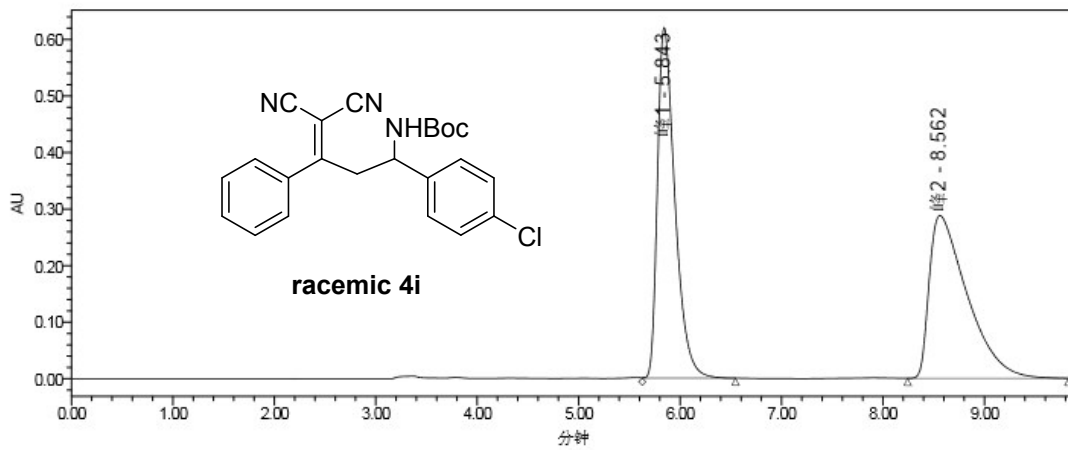

Channel: W2489 ChA; Channel Desc.: W2489 ChA 230nm; Processing Method: 0

|   | Channel Description | Peak Name | RT (min) | Area (礦*sec) | % Area | Height (礦) |
|---|---------------------|-----------|----------|--------------|--------|------------|
| 1 | W2489 ChA 230nm     | 峰1        | 5.843    | 7410726      | 49.80  | 619642     |
| 2 | W2489 ChA 230nm     | 峰2        | 8.562    | 7471520      | 50.20  | 287795     |

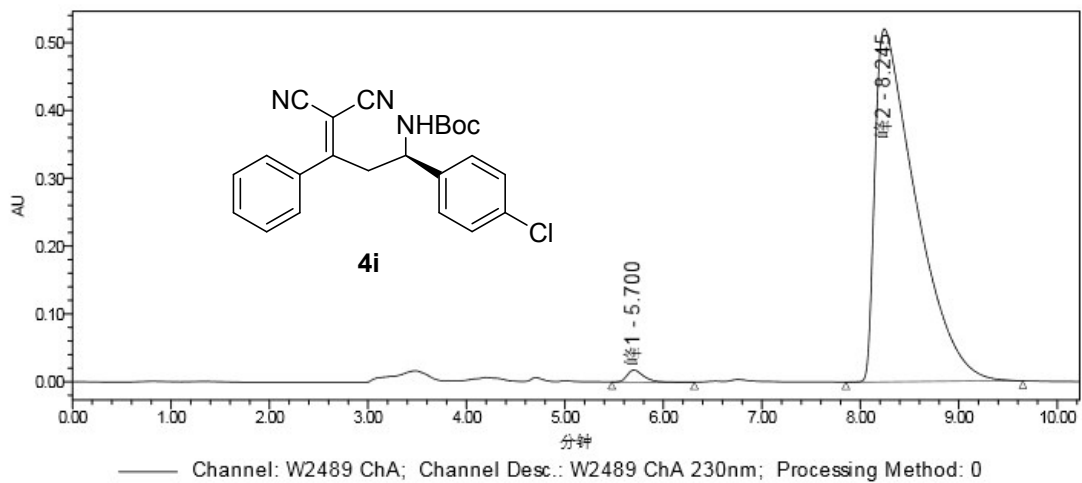

|   | Channel Description | Peak Name | RT (min) | Area (峰*sec) | % Area | Height (峰) |
|---|---------------------|-----------|----------|--------------|--------|------------|
| 1 | W2489 ChA 230nm     | 峰1        | 5.700    | 200784       | 1.32   | 17520      |
| 2 | W2489 ChA 230nm     | 峰2        | 8.245    | 15014281     | 98.68  | 520221     |

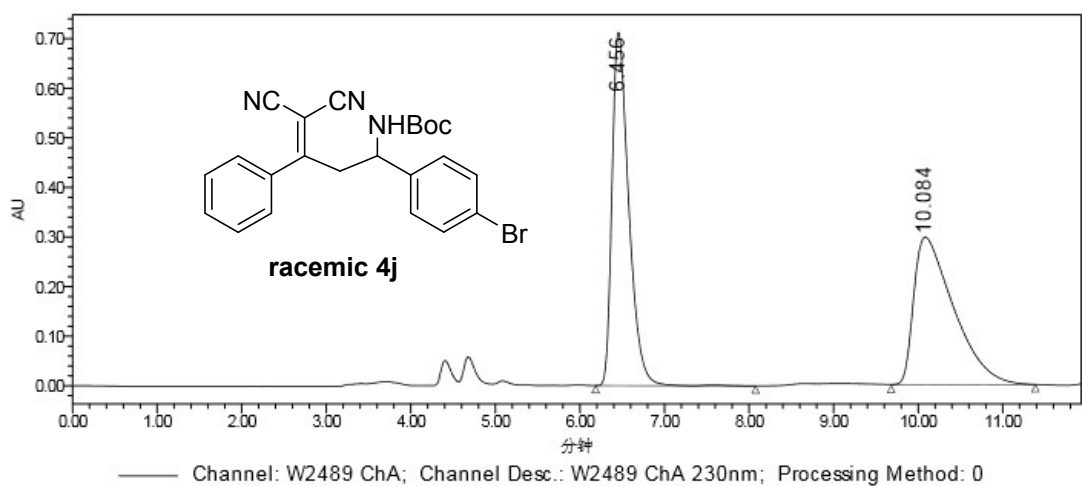

|   | Channel Description | RT (min) | Area (峰*sec) | % Area | Height (峰) |
|---|---------------------|----------|--------------|--------|------------|
| 1 | W2489 ChA 230nm     | 6.456    | 9788873      | 49.99  | 712311     |
| 2 | W2489 ChA 230nm     | 10.084   | 9793105      | 50.01  | 298027     |

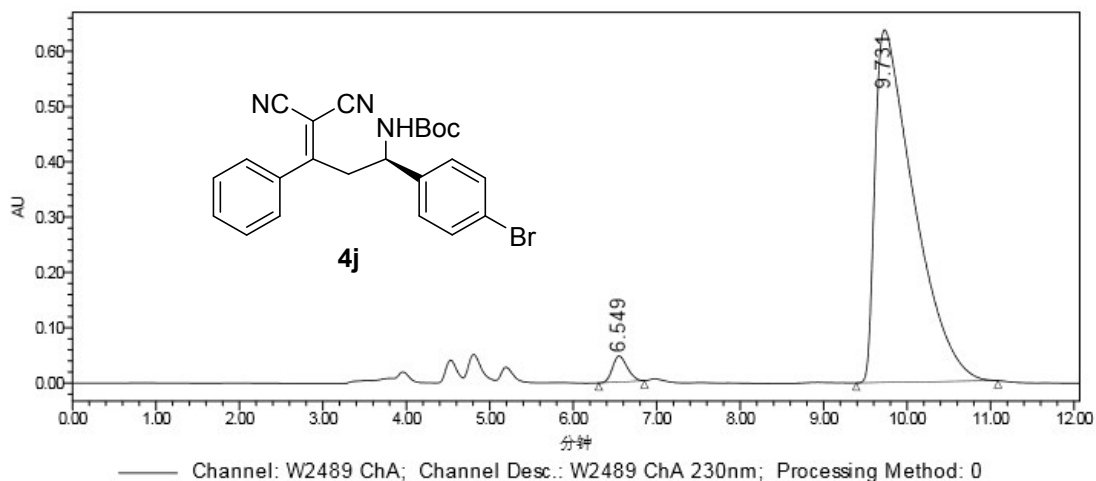

|   | Channel Description | RT (min) | Area (峰*sec) | % Area | Height (峰) |
|---|---------------------|----------|--------------|--------|------------|
| 1 | W2489 ChA 230nm     | 6.549    | 575253       | 2.71   | 46749      |
| 2 | W2489 ChA 230nm     | 9.731    | 20631796     | 97.29  | 637038     |

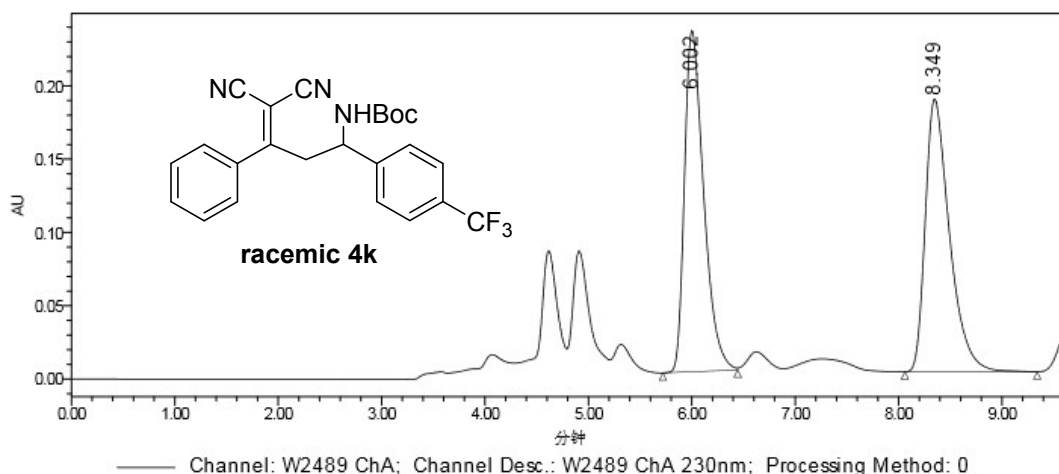

|   | Channel Description | RT (min) | Area (峰*sec) | % Area | Height (峰) |
|---|---------------------|----------|--------------|--------|------------|
| 1 | W2489 ChA 230nm     | 6.002    | 3007666      | 49.78  | 232639     |
| 2 | W2489 ChA 230nm     | 8.349    | 3034043      | 50.22  | 186117     |

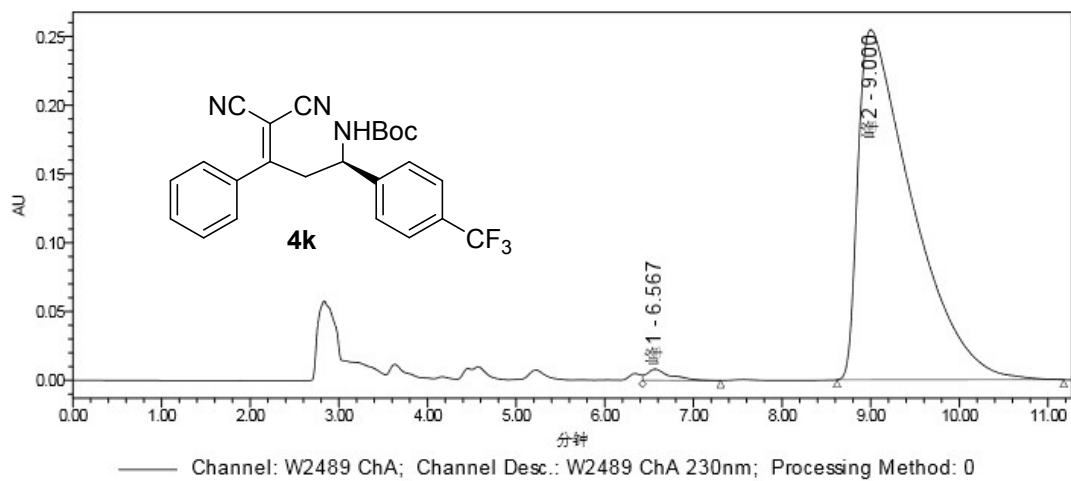

|   | Channel Description | Peak Name | RT (min) | Area (峰*sec) | % Area | Height (峰) |
|---|---------------------|-----------|----------|--------------|--------|------------|
| 1 | W2489 ChA 230nm     | 峰1        | 6.567    | 143714       | 1.31   | 8046       |
| 2 | W2489 ChA 230nm     | 峰2        | 9.000    | 10807292     | 98.69  | 254465     |

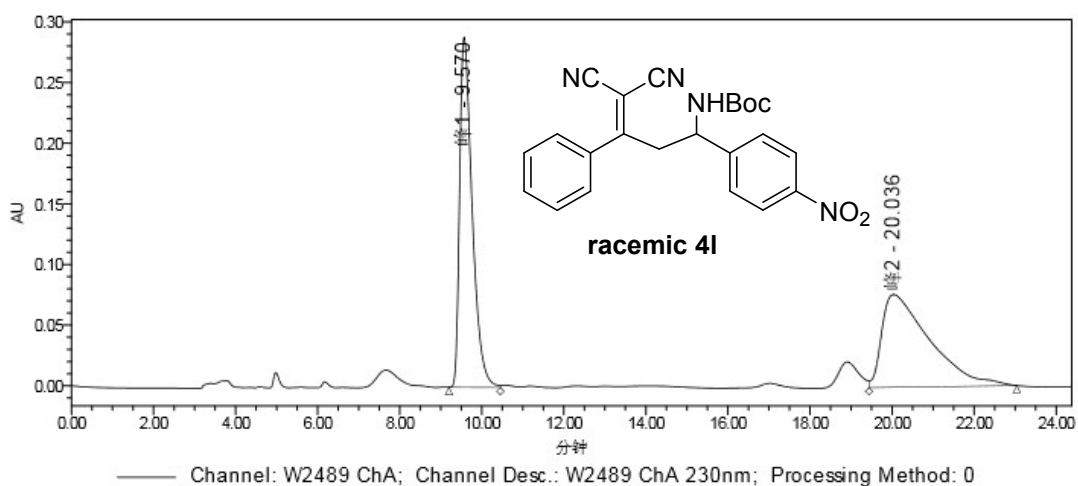

|   | Channel Description | Peak Name | RT (min) | Area (峰*sec) | % Area | Height (峰) |
|---|---------------------|-----------|----------|--------------|--------|------------|
| 1 | W2489 ChA 230nm     | 峰1        | 9.570    | 6108227      | 49.74  | 288635     |
| 2 | W2489 ChA 230nm     | 峰2        | 20.036   | 6173151      | 50.26  | 76452      |

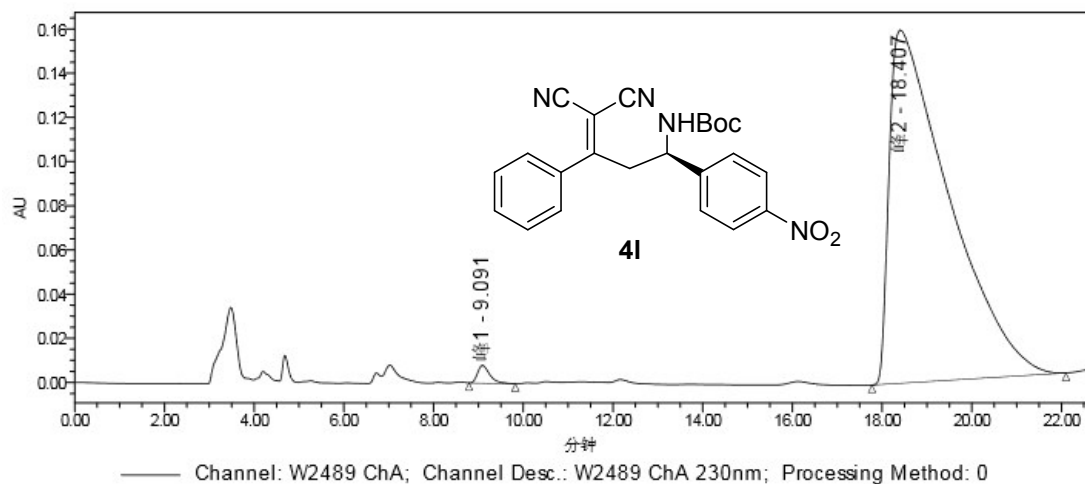

|   | Channel Description | Peak Name | RT (min) | Area (磺*sec) | % Area | Height (磺) |
|---|---------------------|-----------|----------|--------------|--------|------------|
| 1 | W2489 ChA 230nm     | 峰1        | 9.091    | 150560       | 1.01   | 8035       |
| 2 | W2489 ChA 230nm     | 峰2        | 18.407   | 14783321     | 98.99  | 159820     |

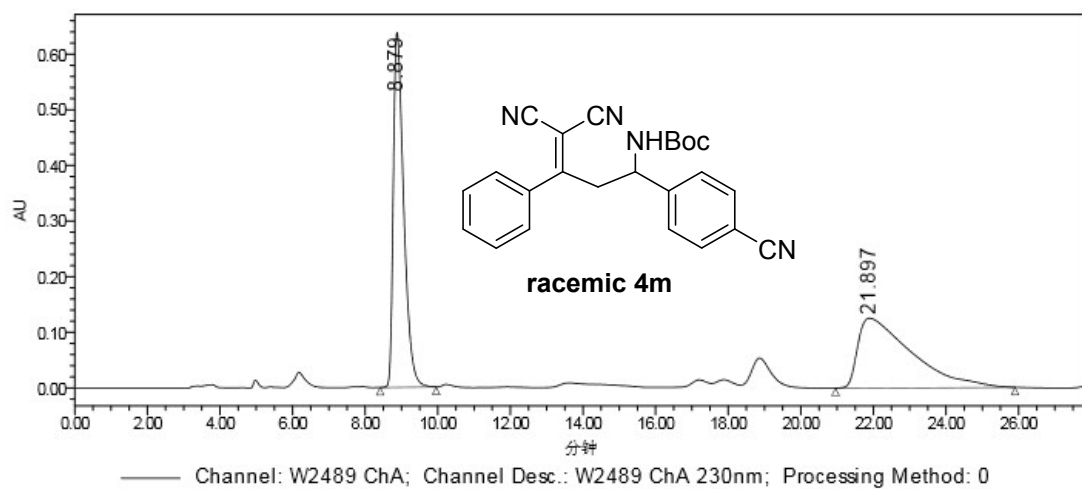

|   | Channel Description | RT (min) | Area (磺*sec) | % Area | Height (磺) |
|---|---------------------|----------|--------------|--------|------------|
| 1 | W2489 ChA 230nm     | 8.879    | 12679704     | 49.77  | 638348     |
| 2 | W2489 ChA 230nm     | 21.897   | 12795476     | 50.23  | 125310     |

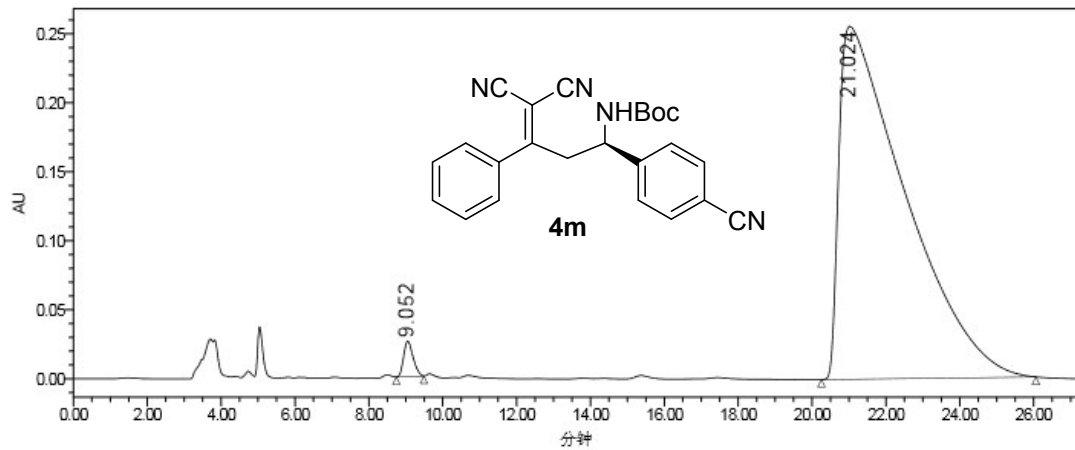

Channel: W2489 ChA; Channel Desc.: W2489 ChA 230nm; Processing Method: 0

|   | Channel Description | RT (min) | Area (AU*sec) | % Area | Height (AU) |
|---|---------------------|----------|---------------|--------|-------------|
| 1 | W2489 ChA 230nm     | 9.052    | 459948        | 1.42   | 25723       |
| 2 | W2489 ChA 230nm     | 21.024   | 31920405      | 98.58  | 255735      |

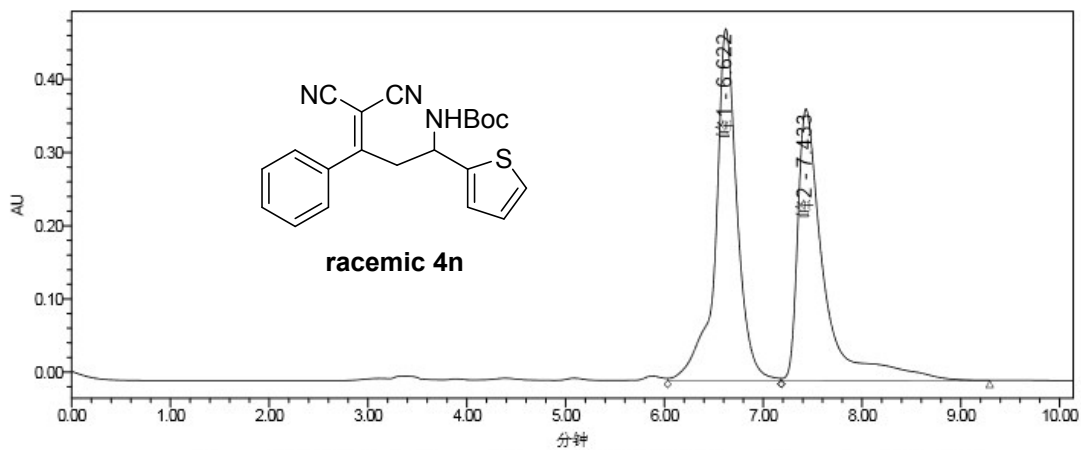

Channel: W2489 ChA; Channel Desc.: W2489 ChA 230nm; Processing Method: 0

|   | Channel Description | Peak Name | RT (min) | Area (AU*sec) | % Area | Height (AU) |
|---|---------------------|-----------|----------|---------------|--------|-------------|
| 1 | W2489 ChA 230nm     | 峰1        | 6.622    | 7353939       | 51.82  | 480284      |
| 2 | W2489 ChA 230nm     | 峰2        | 7.433    | 6836650       | 48.18  | 370782      |

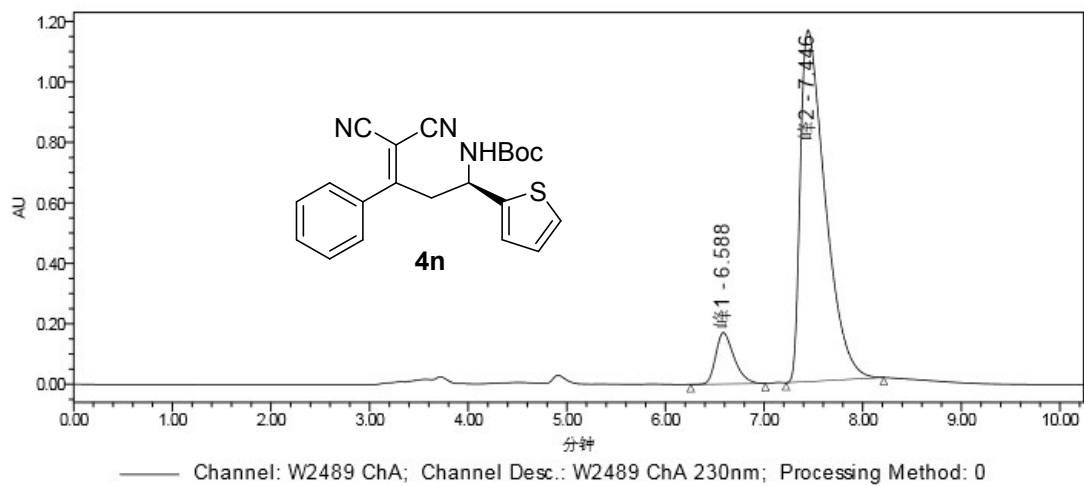

|   | Channel Description | Peak Name | RT (min) | Area (AU*sec) | % Area | Height (AU) |
|---|---------------------|-----------|----------|---------------|--------|-------------|
| 1 | W2489 ChA 230nm     | 峰1        | 6.588    | 2193944       | 9.71   | 169514      |
| 2 | W2489 ChA 230nm     | 峰2        | 7.446    | 20395393      | 90.29  | 1162082     |

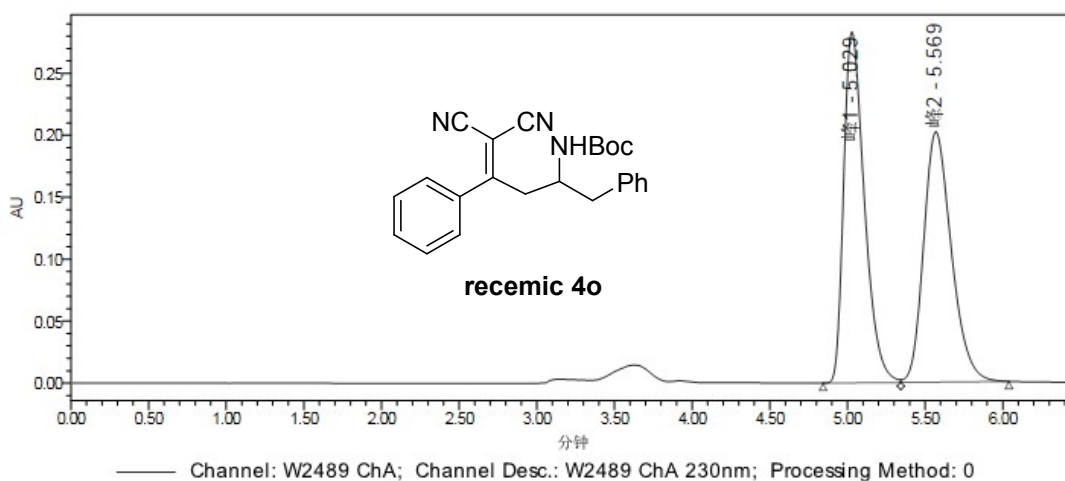

|   | Channel Description | Peak Name | RT (min) | Area (AU*sec) | % Area | Height (AU) |
|---|---------------------|-----------|----------|---------------|--------|-------------|
| 1 | W2489 ChA 230nm     | 峰1        | 5.029    | 2620125       | 51.09  | 282847      |
| 2 | W2489 ChA 230nm     | 峰2        | 5.569    | 2508190       | 48.91  | 201942      |



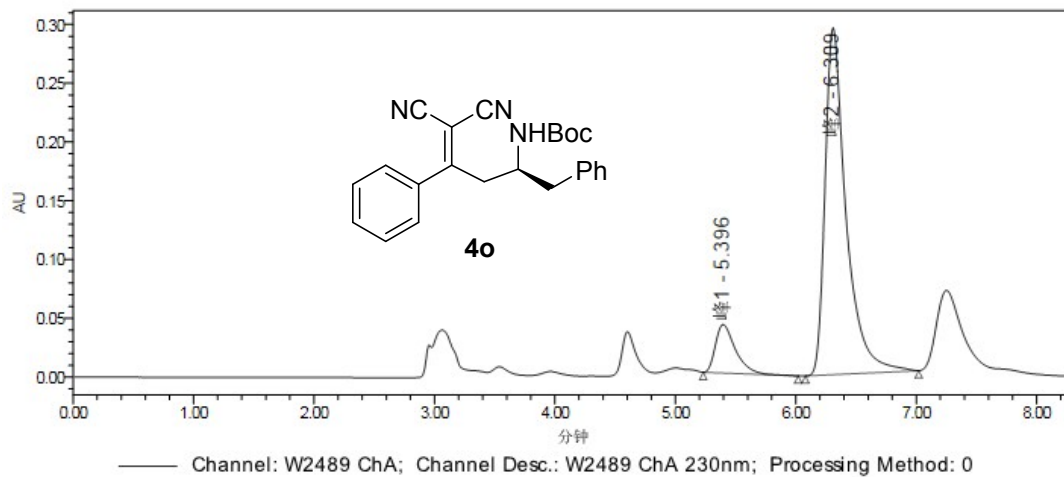

|   | Channel Description | Peak Name | RT (min) | Area (峰*sec) | % Area | Height (峰) |
|---|---------------------|-----------|----------|--------------|--------|------------|
| 1 | W2489 ChA 230nm     | 峰1        | 5.396    | 479027       | 11.81  | 41289      |
| 2 | W2489 ChA 230nm     | 峰2        | 6.309    | 3576281      | 88.19  | 294786     |

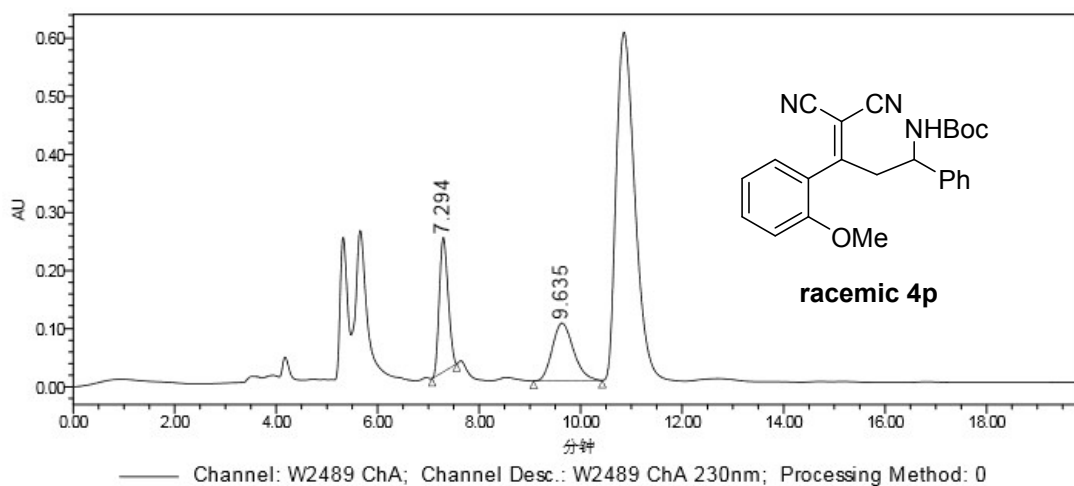

|   | Channel Description | RT (min) | Area (峰*sec) | % Area | Height (峰) |
|---|---------------------|----------|--------------|--------|------------|
| 1 | W2489 ChA 230nm     | 7.294    | 2794210      | 49.19  | 231045     |
| 2 | W2489 ChA 230nm     | 9.635    | 2886330      | 50.81  | 99213      |

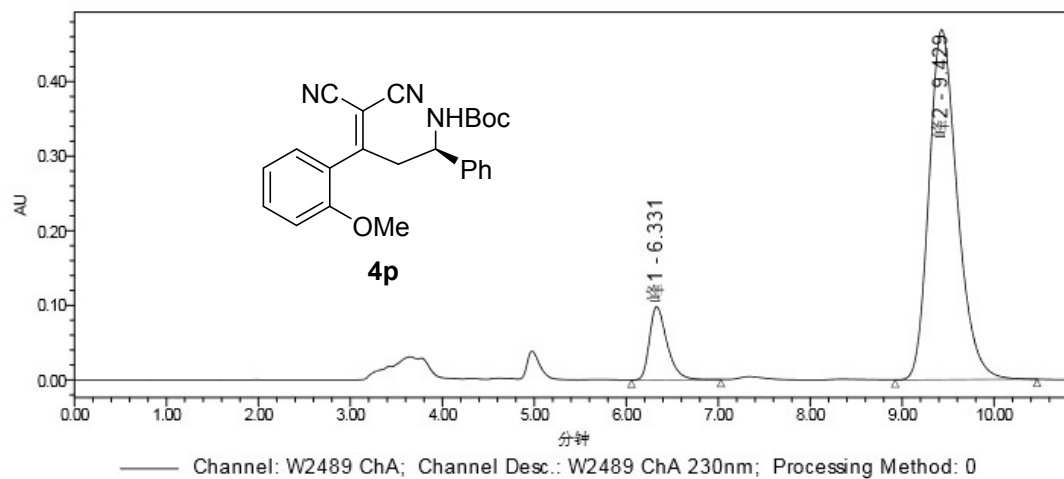

|   | Channel Description | Peak Name | RT (min) | Area (峰*sec) | % Area | Height (峰) |
|---|---------------------|-----------|----------|--------------|--------|------------|
| 1 | W2489 ChA 230nm     | 峰1        | 6.331    | 1296806      | 11.44  | 98208      |
| 2 | W2489 ChA 230nm     | 峰2        | 9.429    | 10040423     | 88.56  | 469272     |

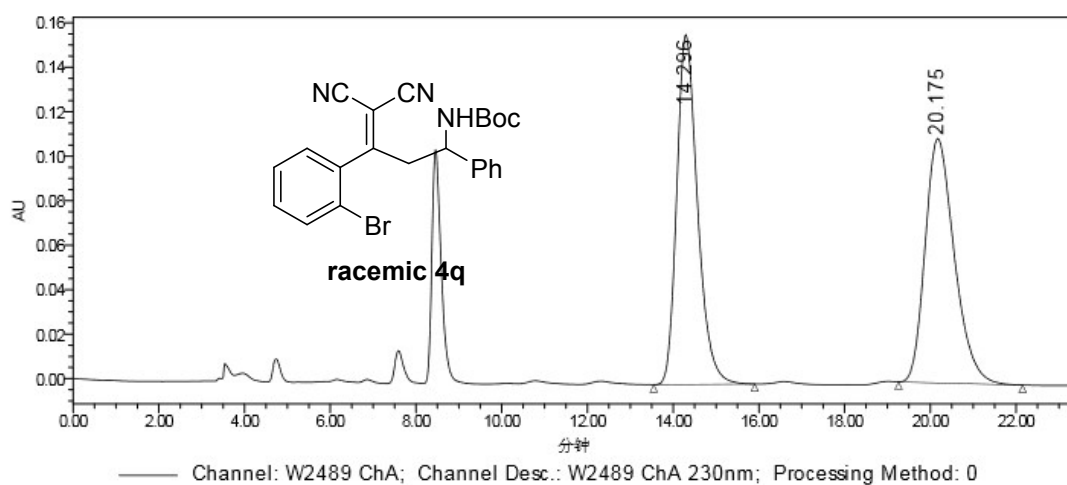

|   | Channel Description | RT (min) | Area (峰*sec) | % Area | Height (峰) |
|---|---------------------|----------|--------------|--------|------------|
| 1 | W2489 ChA 230nm     | 14.296   | 5288355      | 50.36  | 157215     |
| 2 | W2489 ChA 230nm     | 20.175   | 5213429      | 49.64  | 109810     |

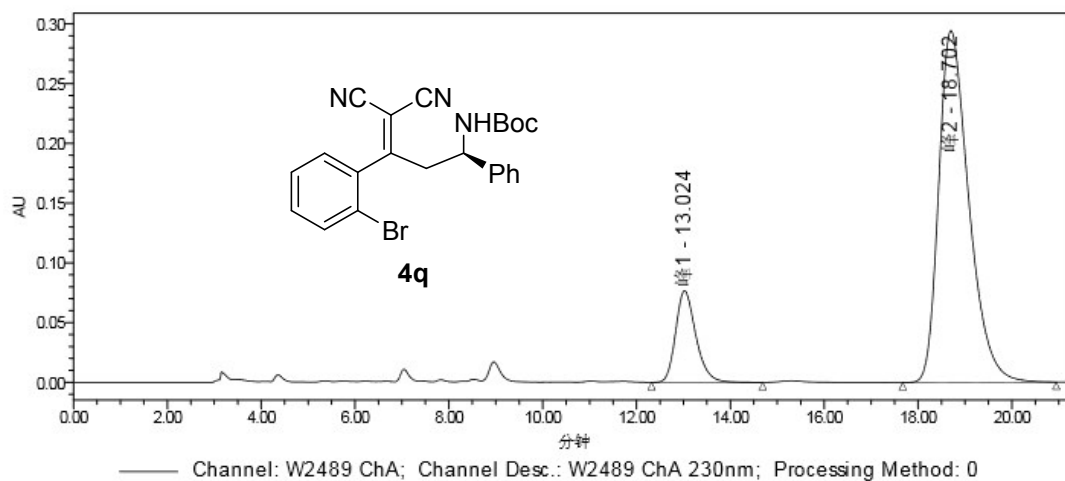

|   | Channel Description | Peak Name | RT (min) | Area (峰*sec) | % Area | Height (峰) |
|---|---------------------|-----------|----------|--------------|--------|------------|
| 1 | W2489 ChA 230nm     | 峰1        | 13.024   | 2296810      | 14.91  | 76691      |
| 2 | W2489 ChA 230nm     | 峰2        | 18.702   | 13110814     | 85.09  | 294217     |

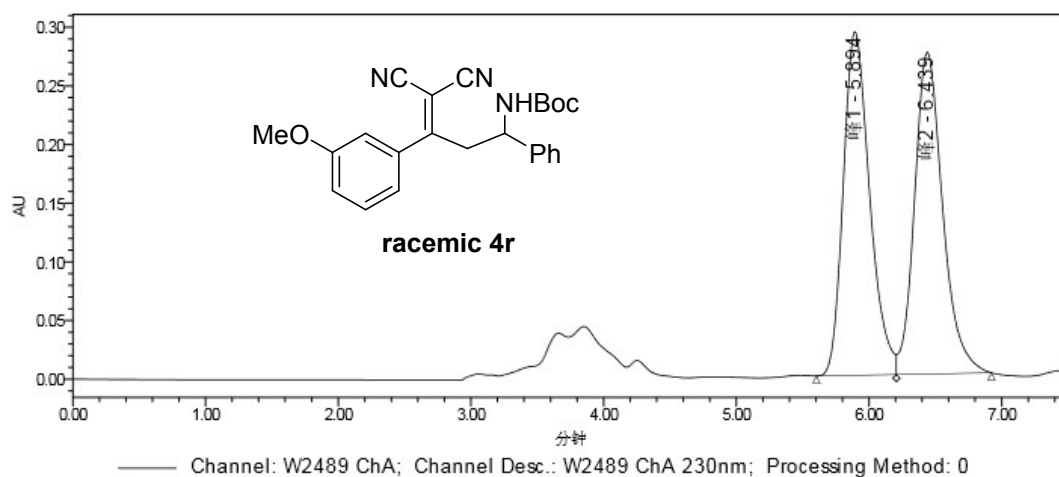

|   | Channel Description | Peak Name | RT (min) | Area (峰*sec) | % Area | Height (峰) |
|---|---------------------|-----------|----------|--------------|--------|------------|
| 1 | W2489 ChA 230nm     | 峰1        | 5.894    | 4041531      | 50.02  | 292668     |
| 2 | W2489 ChA 230nm     | 峰2        | 6.439    | 4037886      | 49.98  | 274196     |

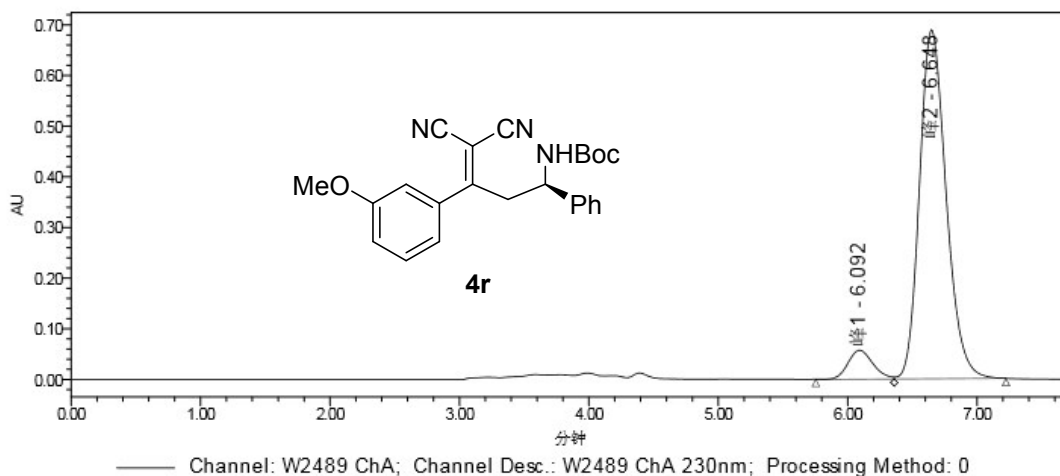

|   | Channel Description | Peak Name | RT (min) | Area (礦*sec) | % Area | Height (礦) |
|---|---------------------|-----------|----------|--------------|--------|------------|
| 1 | W2489 ChA 230nm     | 峰1        | 6.092    | 755993       | 7.14   | 56883      |
| 2 | W2489 ChA 230nm     | 峰2        | 6.648    | 9839179      | 92.86  | 688401     |

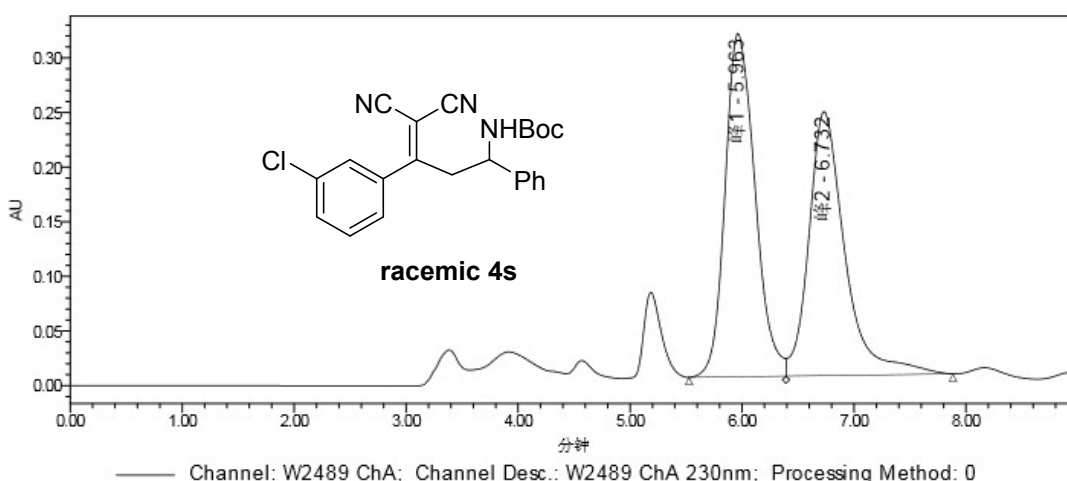

|   | Channel Description | Peak Name | RT (min) | Area (礦*sec) | % Area | Height (礦) |
|---|---------------------|-----------|----------|--------------|--------|------------|
| 1 | W2489 ChA 230nm     | 峰1        | 5.963    | 5842232      | 51.94  | 313969     |
| 2 | W2489 ChA 230nm     | 峰2        | 6.732    | 5405224      | 48.06  | 241578     |

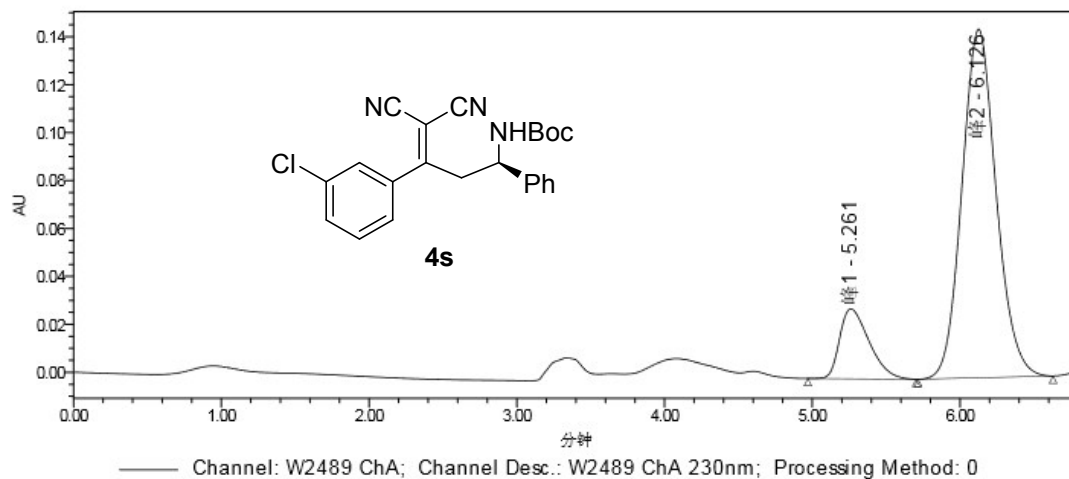

|   | Channel Description | Peak Name | RT (min) | Area (礦*sec) | % Area | Height (礦) |
|---|---------------------|-----------|----------|--------------|--------|------------|
| 1 | W2489 ChA 230nm     | 峰1        | 5.261    | 404013       | 14.74  | 29188      |
| 2 | W2489 ChA 230nm     | 峰2        | 6.126    | 2337644      | 85.26  | 145388     |

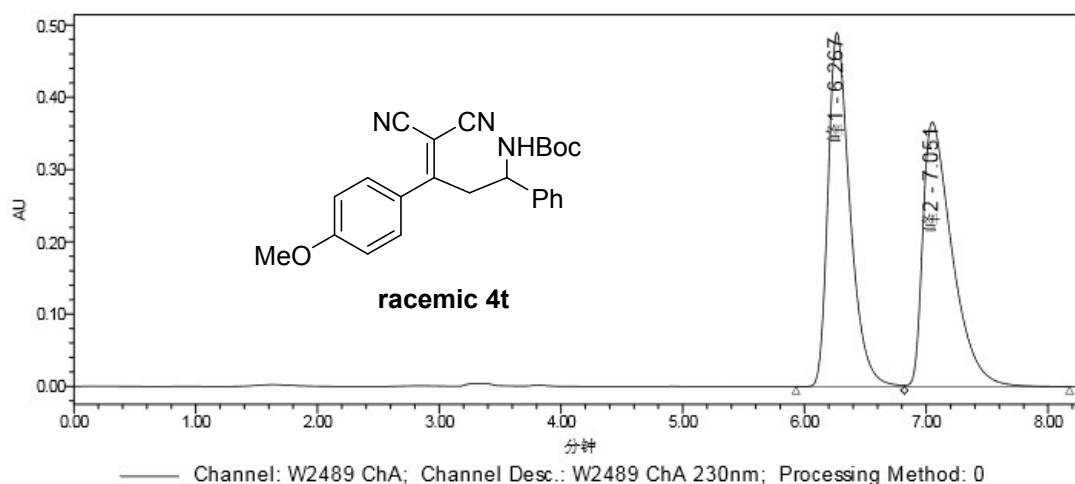

|   | Channel Description | Peak Name | RT (min) | Area (礦*sec) | % Area | Height (礦) |
|---|---------------------|-----------|----------|--------------|--------|------------|
| 1 | W2489 ChA 230nm     | 峰1        | 6.267    | 6138956      | 50.00  | 489935     |
| 2 | W2489 ChA 230nm     | 峰2        | 7.051    | 6138059      | 50.00  | 365870     |

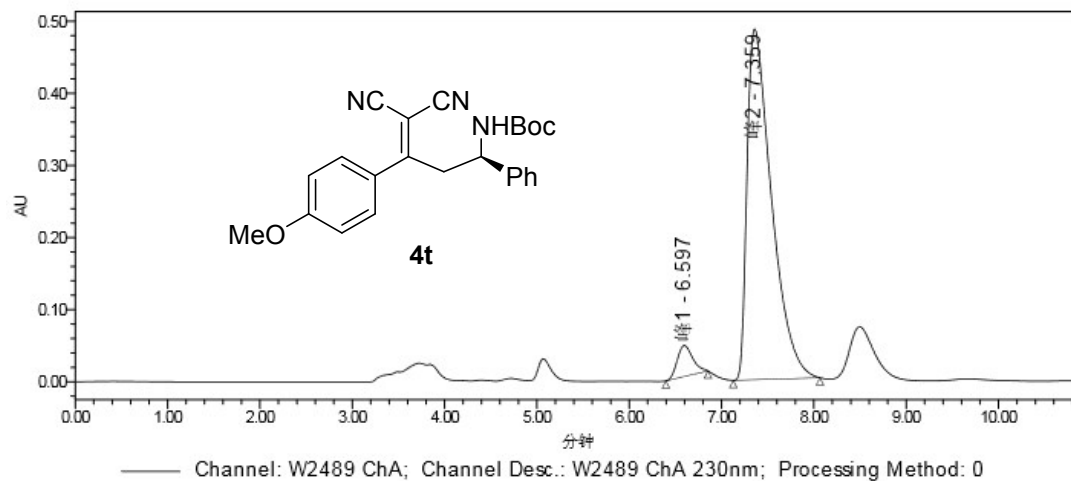

|   | Channel Description | Peak Name | RT (min) | Area (礦*sec) | % Area | Height (礦) |
|---|---------------------|-----------|----------|--------------|--------|------------|
| 1 | W2489 ChA 230nm     | 峰1        | 6.597    | 501983       | 5.32   | 42939      |
| 2 | W2489 ChA 230nm     | 峰2        | 7.359    | 8938872      | 94.68  | 485997     |

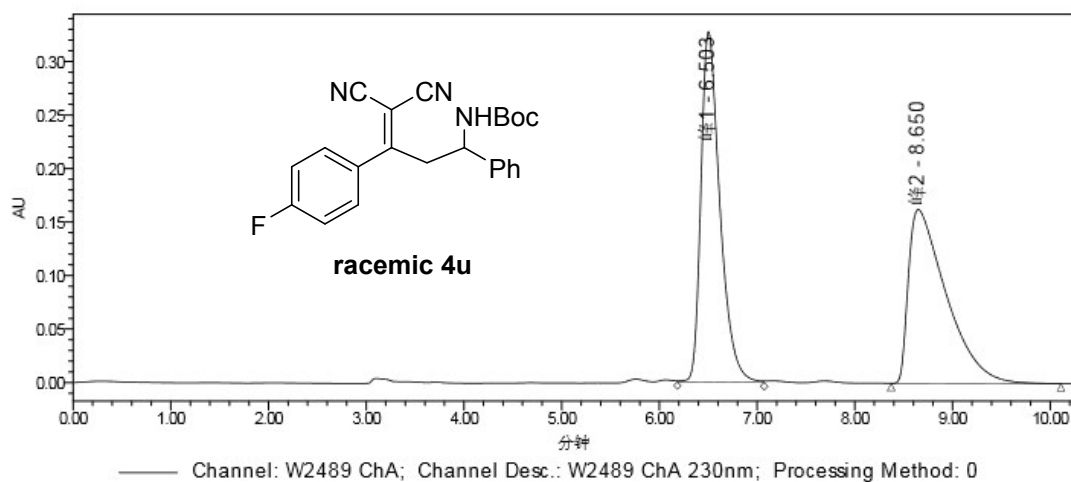

|   | Channel Description | Peak Name | RT (min) | Area (礦*sec) | % Area | Height (礦) |
|---|---------------------|-----------|----------|--------------|--------|------------|
| 1 | W2489 ChA 230nm     | 峰1        | 6.503    | 4416492      | 50.32  | 327353     |
| 2 | W2489 ChA 230nm     | 峰2        | 8.650    | 4361053      | 49.68  | 162449     |

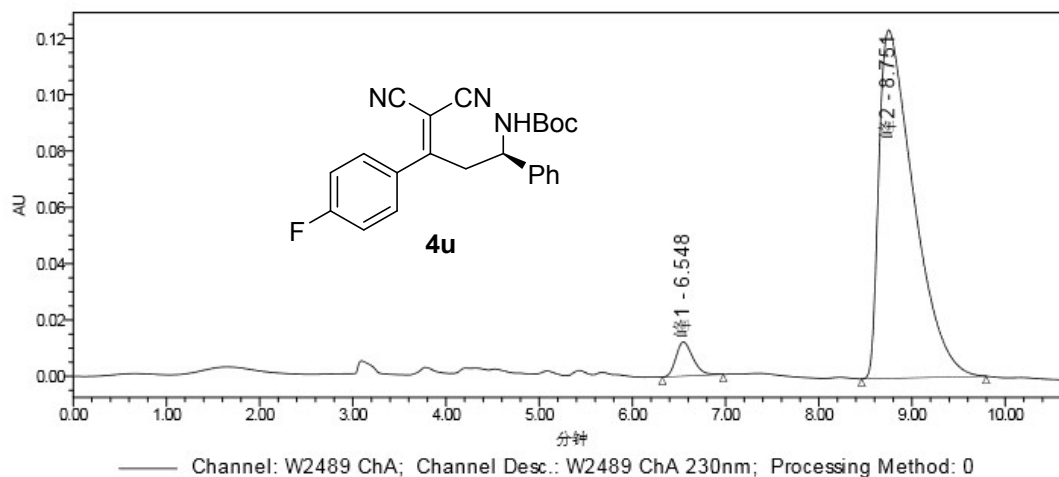

|   | Channel Description | Peak Name | RT (min) | Area (礦*sec) | % Area | Height (礦) |
|---|---------------------|-----------|----------|--------------|--------|------------|
| 1 | W2489 ChA 230nm     | 峰1        | 6.548    | 153144       | 4.57   | 12126      |
| 2 | W2489 ChA 230nm     | 峰2        | 8.751    | 3201026      | 95.43  | 123621     |

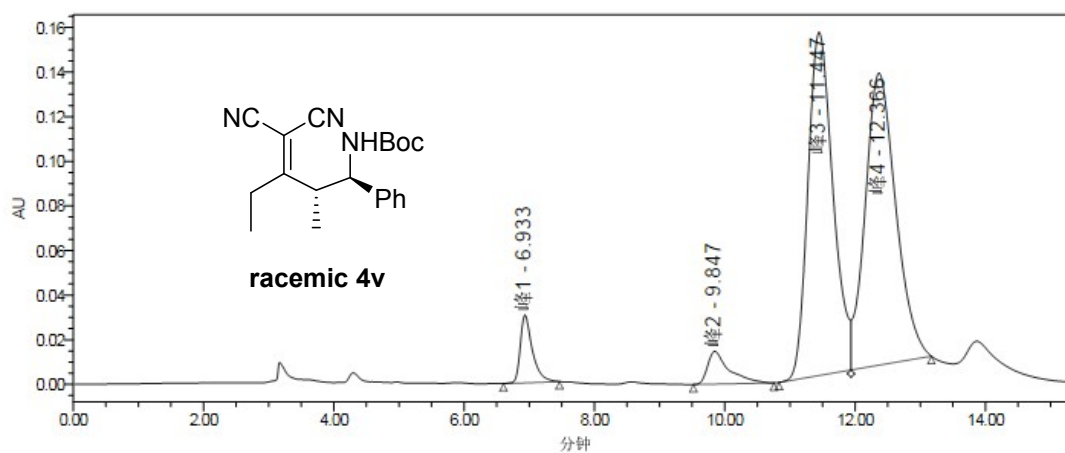

|   | Channel Description | Peak Name | RT (min) | Area (礦*sec) | % Area | Height (礦) |
|---|---------------------|-----------|----------|--------------|--------|------------|
| 1 | W2489 ChA 230nm     | 峰1        | 6.933    | 394554       | 4.33   | 30375      |
| 2 | W2489 ChA 230nm     | 峰2        | 9.847    | 334354       | 3.67   | 14638      |
| 3 | W2489 ChA 230nm     | 峰3        | 11.447   | 4104366      | 45.02  | 153824     |
| 4 | W2489 ChA 230nm     | 峰4        | 12.366   | 4283365      | 46.98  | 130900     |

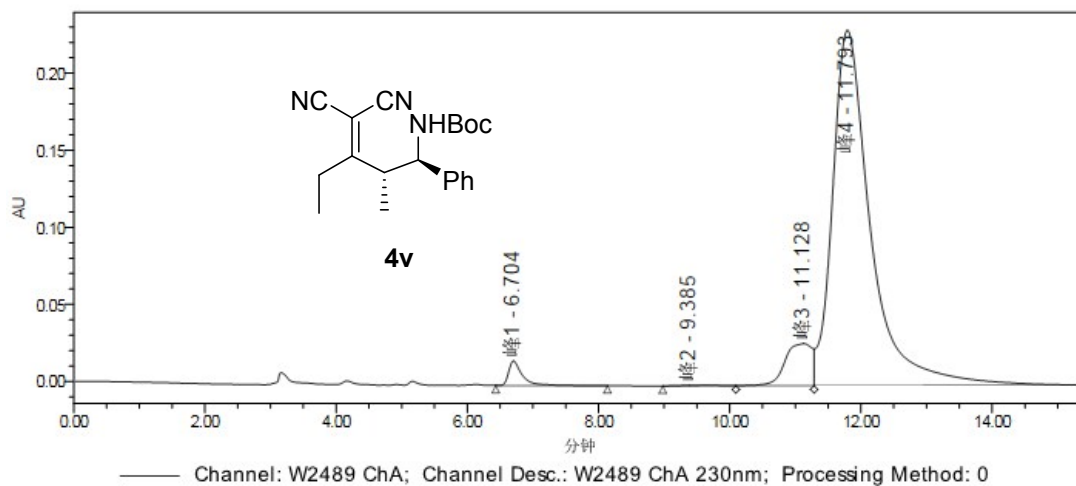

|   | Channel Description | Peak Name | RT (min) | Area (磺*sec) | % Area | Height (磺) |
|---|---------------------|-----------|----------|--------------|--------|------------|
| 1 | W2489 ChA 230nm     | 峰1        | 6.704    | 231652       | 2.24   | 15946      |
| 2 | W2489 ChA 230nm     | 峰2        | 9.385    | 10733        | 0.10   | 302        |
| 3 | W2489 ChA 230nm     | 峰3        | 11.128   | 772061       | 7.48   | 27257      |
| 4 | W2489 ChA 230nm     | 峰4        | 11.793   | 9307646      | 90.17  | 230463     |

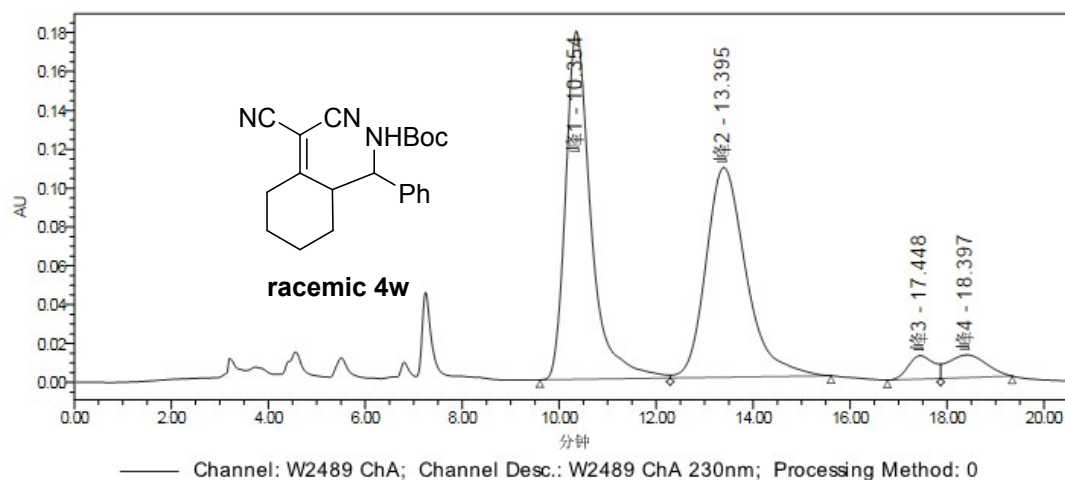

|   | Channel Description | Peak Name | RT (min) | Area (磺*sec) | % Area | Height (磺) |
|---|---------------------|-----------|----------|--------------|--------|------------|
| 1 | W2489 ChA 230nm     | 峰1        | 10.354   | 6506488      | 47.15  | 179113     |
| 2 | W2489 ChA 230nm     | 峰2        | 13.395   | 6213052      | 45.02  | 107990     |
| 3 | W2489 ChA 230nm     | 峰3        | 17.448   | 441282       | 3.20   | 12024      |
| 4 | W2489 ChA 230nm     | 峰4        | 18.397   | 639113       | 4.63   | 11636      |



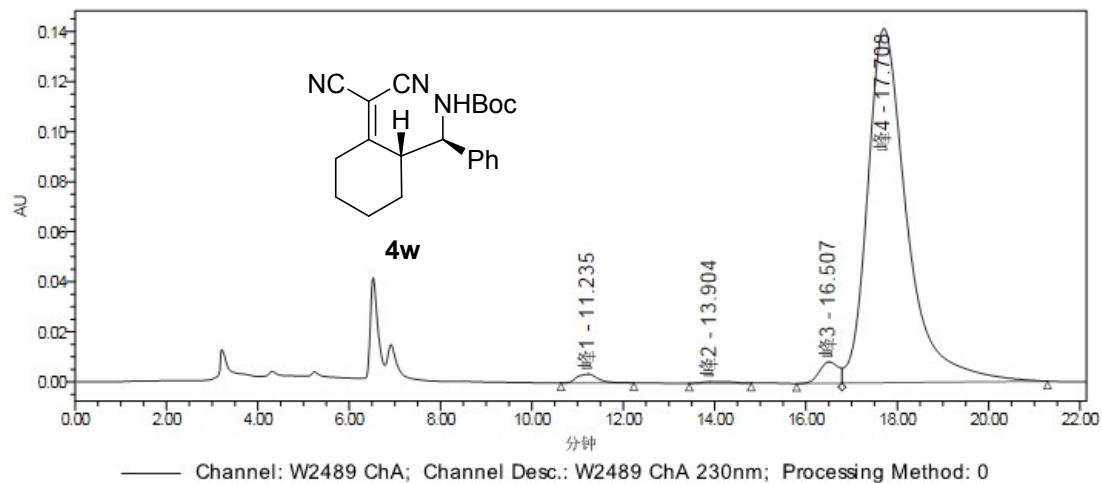

|   | Channel Description | Peak Name | RT (min) | Area (面积*sec) | % Area | Height (面积) |
|---|---------------------|-----------|----------|---------------|--------|-------------|
| 1 | W2489 ChA 230nm     | 峰1        | 11.235   | 111460        | 1.26   | 3499        |
| 2 | W2489 ChA 230nm     | 峰2        | 13.904   | 27641         | 0.31   | 639         |
| 3 | W2489 ChA 230nm     | 峰3        | 16.507   | 247537        | 2.80   | 8534        |
| 4 | W2489 ChA 230nm     | 峰4        | 17.708   | 8468310       | 95.63  | 141506      |

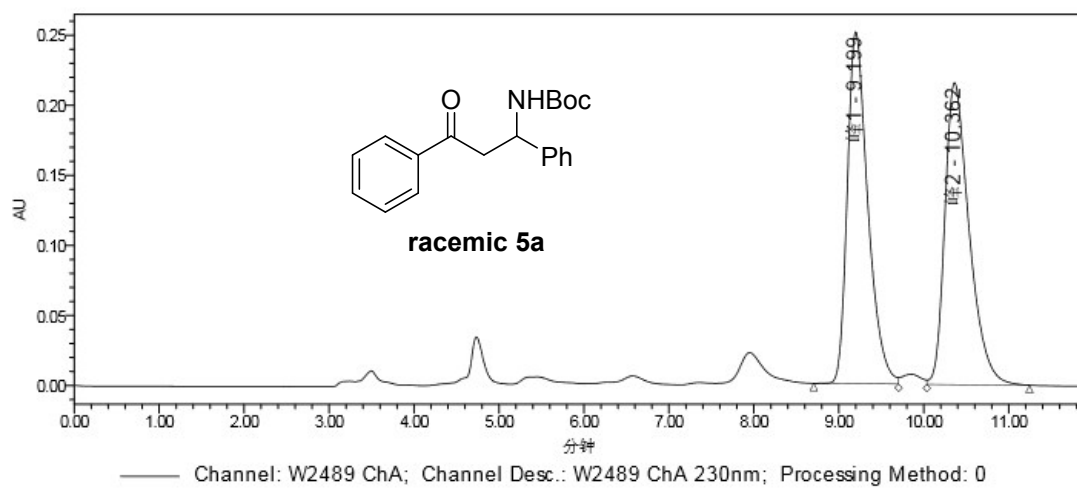

|   | Channel Description | Peak Name | RT (min) | Area (面积*sec) | % Area | Height (面积) |
|---|---------------------|-----------|----------|---------------|--------|-------------|
| 1 | W2489 ChA 230nm     | 峰1        | 9.199    | 4210769       | 49.53  | 250995      |
| 2 | W2489 ChA 230nm     | 峰2        | 10.362   | 4290116       | 50.47  | 215404      |

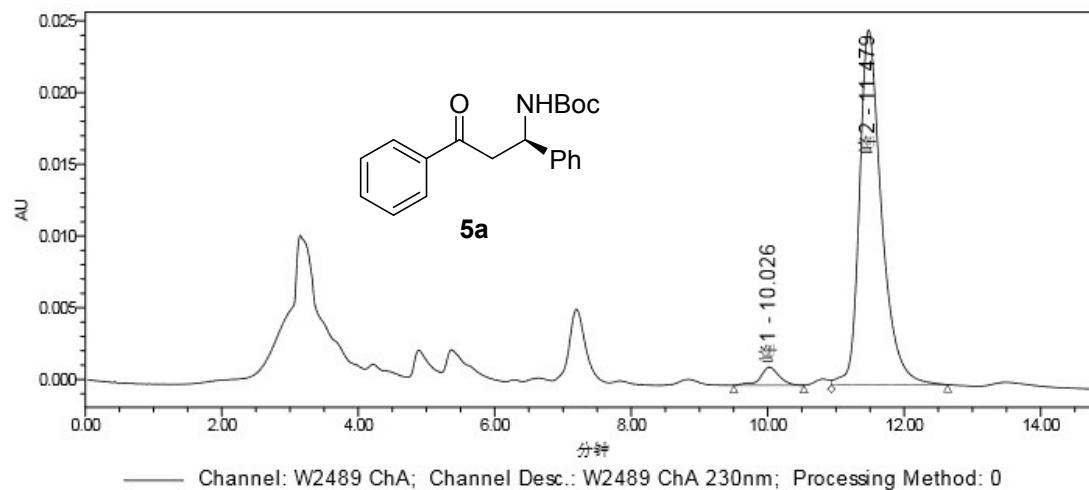

|   | Channel Description | Peak Name | RT (min) | Area (峰*sec) | % Area | Height (峰) |
|---|---------------------|-----------|----------|--------------|--------|------------|
| 1 | W2489 ChA 230nm     | 峰1        | 10.026   | 24126        | 4.14   | 1264       |
| 2 | W2489 ChA 230nm     | 峰2        | 11.479   | 559139       | 95.86  | 24739      |

## 7. Reference

1. A. F. Kyle, P. Jakubec, D. M. Cockfield, E. Cleator, J. Skidmore and D. J. Dixon, *Chem. Commun.*, 2011, **47**, 10037-10039.
2. W. Peng, J. Wan, B. Xie and X. Ma, *Org. Biomol. Chem.*, 2014, **12**, 8336-8345.
3. D. Villemin, Z. Belhadj, N. Cheikh, N. Choukchou-Braham, N. Bar and J.-F. Lohier, *Tetrahedron Letters*, 2013, **54**, 1664-1668.
4. A. G. Wenzel and E. N. Jacobsen, *J. Am. Chem. Soc.*, 2002, **124**, 12964-12965.
5. L. Huang and W. D. Wulff, *J. Am. Chem. Soc.*, 2011, **133**, 8892-8895.
6. T. Mecozzi and M. Petrini, *J. Org. Chem.*, 1999, **64**, 8970-8972.
7. N. Lu, R. Li, Z. Wei, J. Cao, D. Liang, Y. Lin and H. Duan, *J. Org. Chem.*, 2017, **82**, 4668-4676.
8. K. M. Johnson, M. S. Rattley, F. Sladojevich, D. M. Barber, M. G. Nuñez, A. M. Goldys and D. J. Dixon, *Org. Lett.*, 2012, **14**, 2492-2495.
9. B. Wang, T. Xu, L. Zhu, Y. Lan, J. Wang, N. Lu, Z. Wei, Y. Lin and H. Duan, *Org. Chem. Front.*, 2017, **4**, 1266-1271.
